# Supplementary material for: Chiral N-tert-butanesulfinyl α,β-unsaturated ketimine: a simple and highly effective olefin/sulfinimide hybrid ligand for asymmetric 1,4-additions
Source: Royal Society of Chemistry journal article supplement (doi:10.1039/c1ob05971h), 2011-01-01

## Chiral *N*-*tert*-Butanesulfinyl $\alpha,\beta$ -Unsaturated Ketimine: A Simple and Highly Effective Olefin/Sulfinimide Hybrid Ligand for Asymmetric 1,4-Additions

Xiangqing Feng,<sup>a</sup> Beibei Wei,<sup>b</sup> Jing Yang\*<sup>b</sup> and Haifeng Du\*<sup>a</sup>

<sup>a</sup> Beijing National Laboratory of Molecular Sciences, CAS Key laboratory of Molecular Recognition and Function, Institute of Chemistry, Chinese Academy of Sciences, Beijing 100190.

<sup>b</sup> State Key Laboratory of Chemical Resource, College of Life Science and Technology, Beijing University of Chemical Technology, Beijing 100029, China

### Supporting Information

#### Table of contents:

|                                                                                   |         |
|-----------------------------------------------------------------------------------|---------|
| General procedure for the synthesis of chiral olefin/sulfinimide ligands <b>4</b> | S2      |
| Characterization of <b>4a-l</b>                                                   | S2-S4   |
| General procedure for <b>4a</b> /Rh-catalyzed asymmetric 1,4-additions            | S4      |
| Characterization of adducts <b>7</b>                                              | S4-S8   |
| The chromatography for the determination of enantiomeric excess                   | S9-S19  |
| NMR spectra for ligands <b>4</b>                                                  | S20-S43 |
| NMR spectra for products <b>7</b>                                                 | S44-S85 |

**General procedure for the synthesis of chiral olefin/sulfinamide ligands 4.** To a solution of (*R*)-*tert*-butanesulfinamide (0.727 g, 6.0 mmol) in THF (12.0 mL) under argon was added  $\alpha,\beta$ -unsaturated ketone or aldehyde (6.6 mmol), and then Ti(OEt)<sub>4</sub> (2.5 mL, 12.0 mmol) was added. The resulting mixture was heated at 80 °C overnight before cooled to room temperature. Brine (12.0 mL) was then added and the mixture was stirred at room temperature for 5 min before filtered through celite. The filter cake was washed with ethyl acetate and the aqueous layer was extracted with ethyl acetate twice. The combined organic layer was washed with brine, dried over Na<sub>2</sub>SO<sub>4</sub>, filtered, and concentrated under vacuum to give the crude product. The residue was then purified by flash chromatography on silica gel (hexanes/ethyl acetate = 10/1 to 5/1, v/v) to afford the corresponding products **4**.

**(*R*)-*N*-[(*E*)-1,3-diphenylprop-2-enylidene]-*tert*-butanesulfinamide (**4a**):** 71% yield, yellow solid;  $[\alpha]_{\text{D}}^{20} = -378.3$  (*c* 0.95, CHCl<sub>3</sub>); <sup>1</sup>H NMR (400 MHz, CDCl<sub>3</sub>):  $\delta$  8.07 (d, *J* = 16.0 Hz, 1H), 7.75-7.57 (m, 2H), 7.56-7.41 (m, 5H), 7.40-7.31 (m, 3H), 6.90 (d, *J* = 16.0 Hz, 1H), 1.34 (s, 9H); <sup>13</sup>C NMR (100 MHz, CDCl<sub>3</sub>):  $\delta$  175.1, 143.6, 138.5, 135.0, 130.5, 129.9, 129.0, 128.6, 128.1, 127.8, 122.2, 58.1, 22.6.

J. P. McMahon and J. A. Ellman, *Org. Lett.*, 2005, **7**, 5393.

**(*R*)-*N*-[(*E*)-1,3-bis(*p*-tolyl)prop-2-enylidene]-*tert*-butanesulfinamide (**4b**):** 57% yield, yellow oil;  $[\alpha]_{\text{D}}^{20} = -390.7$  (*c* 0.89, CHCl<sub>3</sub>); IR (film): 1538, 1088 cm<sup>-1</sup>; <sup>1</sup>H NMR (400 MHz, CDCl<sub>3</sub>):  $\delta$  7.97 (d, *J* = 13.6 Hz, 1H), 7.66-7.45 (m, 2H), 7.29-7.17 (m, 2H), 7.16-7.06 (m, 2H), 6.89 (d, *J* = 16.0 Hz, 1H), 2.40 (s, 3H), 2.33 (s, 3H), 1.32 (s, 9H); <sup>13</sup>C NMR (100 MHz, CDCl<sub>3</sub>):  $\delta$  175.8, 143.9, 141.1, 140.4, 136.1, 132.6, 129.6, 129.4, 129.0, 128.1, 121.6, 58.0, 22.7, 21.5, 21.5; HRMS (EI) calcd for C<sub>21</sub>H<sub>25</sub>NOS (M): 339.1657; Found: 339.1661.

**(*R*)-*N*-[(*E*)-1,3-bis(3-chlorophenyl)prop-2-enylidene]-*tert*-butanesulfinamide (**4c**):** 89% yield, yellow oil;  $[\alpha]_{\text{D}}^{20} = -300.7$  (*c* 1.00, CHCl<sub>3</sub>); IR (film): 1473, 1275, 1074 cm<sup>-1</sup>; <sup>1</sup>H NMR (400 MHz, CDCl<sub>3</sub>):  $\delta$  8.12 (d, *J* = 14.4 Hz, 1H), 7.73-7.08 (m, 8H), 6.78 (d, *J* = 16.4 Hz, 1H), 1.34 (s, 9H); <sup>13</sup>C NMR (100 MHz, CDCl<sub>3</sub>):  $\delta$  172.8, 142.1, 140.1, 136.8, 134.8, 134.4, 130.6, 130.0, 129.9, 129.6, 128.9, 127.8, 127.2, 126.1, 123.2, 58.8, 22.8; HRMS (EI) calcd for C<sub>19</sub>H<sub>19</sub>NOSCl<sub>2</sub> (M): 379.0564; Found: 379.0569.

**(*R*)-*N*-[(*E*)-1-phenyl-3-(*p*-tolyl)prop-2-enylidene]-*tert*-butanesulfinamide (**4d**):** 63% yield, yellow solid; mp 79-81 °C;  $[\alpha]_{\text{D}}^{20} = -395.7$  (*c* 1.00, CHCl<sub>3</sub>); IR (film): 1540, 1069 cm<sup>-1</sup>; <sup>1</sup>H NMR (400 MHz, CDCl<sub>3</sub>):  $\delta$  8.02 (d, *J* = 15.2 Hz, 1H), 7.74-7.33 (m, 7H), 7.17 (d, *J* = 17.6 Hz, 2H), 6.88 (d, *J* = 16.0 Hz, 1H), 2.36 (s, 3H), 1.34 (s, 9H); <sup>13</sup>C NMR (100 MHz, CDCl<sub>3</sub>):  $\delta$  175.9, 144.4, 140.7, 139.0, 132.6, 130.7, 129.8, 129.4, 128.4, 128.3, 121.6, 58.3, 22.9, 21.6; Anal. Calcd for C<sub>20</sub>H<sub>23</sub>NOS: C, 73.81; H, 7.12; N, 4.30. Found: C, 73.88; H, 7.16; N, 4.21.

**(*R*)-*N*-[(*E*)-3-(4-nitrophenyl)-1-phenylprop-2-enylidene]-*tert*-butanesulfinamide (**4e**):** 83% yield, orange solid; mp 42-45 °C;  $[\alpha]_{\text{D}}^{20} = -388.7$  (*c* 1.00, CHCl<sub>3</sub>); IR (film): 1519, 1344, 1089 cm<sup>-1</sup>; <sup>1</sup>H NMR

(400 MHz, CDCl<sub>3</sub>):  $\delta$  8.29 (d,  $J$  = 16.0 Hz, 1H), 8.21 (d,  $J$  = 8.8 Hz, 2H), 7.64 (d,  $J$  = 8.8 Hz, 4H), 7.57-7.42 (m, 3H), 6.90 (d,  $J$  = 16.0 Hz, 1H), 1.36 (s, 9H); <sup>13</sup>C NMR (100 MHz, CDCl<sub>3</sub>):  $\delta$  173.7, 148.3, 141.7, 140.0, 138.4, 131.1, 129.2, 128.6, 126.7, 124.2, 59.2, 23.0; HRMS (EI) calcd for C<sub>19</sub>H<sub>20</sub>N<sub>2</sub>O<sub>3</sub>S (M): 356.1195; Found: 356.1190.

**(R)-N-[(E)-3-(naphthalen-1-yl)-1-phenylprop-2-enylidene]-tert-butanesulfinamide (4f)**: 77% yield, yellow solid; mp 99-101 °C;  $[\alpha]_{\text{D}}^{20}$  = -332.2 ( $c$  1.00, CHCl<sub>3</sub>); IR (film): 1607, 1540, 1069 cm<sup>-1</sup>; <sup>1</sup>H NMR (400 MHz, CDCl<sub>3</sub>):  $\delta$  8.10 (d,  $J$  = 14.8 Hz, 1H), 7.95-7.64 (m, 7H), 7.61-7.43 (m, 6H), 1.37 (s, 9H); <sup>13</sup>C NMR (100 MHz, CDCl<sub>3</sub>):  $\delta$  175.7, 140.8, 133.9, 132.7, 131.6, 131.1, 130.5, 129.6, 129.0, 128.6, 127.0, 126.3, 125.9, 125.5, 123.2, 58.5, 23.0; Anal. Calcd for C<sub>23</sub>H<sub>23</sub>NOS: C, 76.42; H, 6.41; N, 3.87. Found: C, 76.52; H, 6.48; N, 3.68.

**(R)-N-[(E)-3-phenylprop-2-enylidene]-tert-butanesulfinamide (4g)**: 98% yield, light yellow solid;  $[\alpha]_{\text{D}}^{20}$  = -333.5 ( $c$  1.00, CHCl<sub>3</sub>); <sup>1</sup>H NMR (400 MHz, CDCl<sub>3</sub>):  $\delta$  8.38 (d,  $J$  = 9.2 Hz, 1H), 7.59-7.48 (m, 2H), 7.45-7.33 (m, 3H), 7.24 (d,  $J$  = 16.0 Hz, 1H), 7.08 (dd,  $J$  = 16.0, 9.2 Hz, 1H), 1.24 (s, 9H); <sup>13</sup>C NMR (100 MHz, CDCl<sub>3</sub>):  $\delta$  164.0, 146.5, 135.3, 130.4, 129.2, 128.1, 125.8, 57.8, 22.7.

H. K. Chang, D. Y. Jung, M. K. Kim and Y. H. Kim, *Synlett*, 2005, 304.

**(R)-N-[(E)-1-methyl-3-phenylprop-2-enylidene]-tert-butanesulfinamide (4h)**: 85% yield, orange solid;  $[\alpha]_{\text{D}}^{20}$  = -173.6 ( $c$  1.00, CHCl<sub>3</sub>); <sup>1</sup>H NMR (400 MHz, CDCl<sub>3</sub>):  $\delta$  7.94 (d,  $J$  = 16.4 Hz, 0.3H), 7.48 (d,  $J$  = 6.4 Hz, 2H), 7.39-7.27 (m, 3H), 7.23 (d,  $J$  = 16.4 Hz, 0.7 H), 7.12 (d,  $J$  = 16.4 Hz, 0.3H), 6.80 (d,  $J$  = 16.4 Hz, 0.7H), 2.50 (s, 2.1H), 2.37 (s, 0.9H), 1.27 (s, 9H); <sup>13</sup>C NMR (100 MHz, CDCl<sub>3</sub>):  $\delta$  175.9, 173.6, 140.6, 138.8, 134.7, 134.6, 129.7, 129.6, 129.4, 128.4, 127.6, 127.4, 121.7, 57.1, 56.5, 23.9, 22.1, 18.4.

J. P. McMahon and J. A. Ellman, *Org. Lett.*, 2005, 7, 5393.

**(R)-N-[(E)-1-phenylprop-2-enylidene]-tert-butanesulfinamide (4i)**: 53% yield, orange oil;  $[\alpha]_{\text{D}}^{20}$  = -123.2 ( $c$  0.94, CHCl<sub>3</sub>); IR (film): 1550, 1075 cm<sup>-1</sup>; <sup>1</sup>H NMR (400 MHz, CDCl<sub>3</sub>):  $\delta$  7.76-7.33 (m, 6H), 5.92 (d,  $J$  = 11.2 Hz, 1H), 5.61 (d,  $J$  = 17.6 Hz, 1H), 1.32 (s, 9H); <sup>13</sup>C NMR (100 MHz, CDCl<sub>3</sub>):  $\delta$  175.5, 137.9, 131.7, 131.1, 129.3, 128.9, 128.3, 58.2, 22.7; HRMS (EI) calcd for C<sub>13</sub>H<sub>17</sub>NOS (M): 235.1031; Found: 235.1034.

**(R)-N-[(1E,4E)-1,5-diphenylpenta-1,4-dien-3-ylidene]-tert-butanesulfinamide (4j)**: 67% yield, yellow solid; mp 135-138 °C;  $[\alpha]_{\text{D}}^{20}$  = -296.6 ( $c$  0.90, CHCl<sub>3</sub>); IR (film): 1559, 1067 cm<sup>-1</sup>; <sup>1</sup>H NMR (400 MHz, CDCl<sub>3</sub>):  $\delta$  7.92 (d,  $J$  = 13.2 Hz, 1H), 7.65-7.45 (m, 5H), 7.45-7.32 (m, 6H), 7.32-7.07 (m, 2H), 1.34 (s, 9H); <sup>13</sup>C NMR (100 MHz, CDCl<sub>3</sub>):  $\delta$  170.8, 140.3, 135.6, 130.0, 129.1, 128.2, 124.8, 58.7, 23.0; Anal. Calcd for C<sub>21</sub>H<sub>23</sub>NOS: C, 74.74; H, 6.87; N, 4.15. Found: C, 74.58; H, 7.00; N, 4.10.

**(R)-N-[(E)-2-benzylidenecyclohexylidene]-tert-butanesulfinamide (4k):** 63% yield, yellow oil;  $[\alpha]_D^{20} = +118.4$  (*c* 1.06, CHCl<sub>3</sub>); IR (film): 1261, 1275, 1066 cm<sup>-1</sup>; <sup>1</sup>H NMR (400 MHz, CDCl<sub>3</sub>): δ 7.42-7.21 (m, 6H), 3.16-3.01 (m, 1H), 2.98-2.86 (m, 1H), 2.85-2.64 (m, 2H), 1.94-1.74 (m, 2H), 1.74-1.59 (m, 2H), 1.30 (s, 9H); <sup>13</sup>C NMR (100 MHz, CDCl<sub>3</sub>): δ 183.1, 138.4, 136.4, 132.9, 130.1, 128.4, 128.1, 57.0, 34.4, 29.2, 24.1, 22.6; Anal. Calcd for C<sub>17</sub>H<sub>23</sub>NOS: C, 70.54; H, 8.01; N, 4.84. Found: C, 70.37; H, 7.96; N, 4.63.

**(R)-N-(cyclohex-2-en-ylidene)-tert-butanesulfinamide (4l):** 65% yield, yellow oil;  $[\alpha]_D^{20} = -331.9$  (*c* 0.75, CHCl<sub>3</sub>); <sup>1</sup>H NMR (400 MHz, CDCl<sub>3</sub>): δ 7.07 (d, *J* = 10.0 Hz, 0.4H), 6.68-6.55 (m, 1H), 6.18 (d, *J* = 10.0 Hz, 0.6H), 3.09-2.93 (m, 0.6H), 2.87-2.73 (m, 0.6H), 2.58-2.51 (m, 0.8H), 2.34-2.19 (m, 2H), 1.99-1.75 (m, 2H), 1.21 (s, 9H); <sup>13</sup>C NMR (100 MHz, CDCl<sub>3</sub>): δ 177.9, 175.7, 146.0, 144.9, 130.4, 123.1, 56.9, 56.5, 36.1, 30.9, 26.0, 25.2, 22.5, 22.3, 22.2, 21.9.

J. P. McMahon and J. A. Ellman, *Org. Lett.*, 2005, **7**, 5393.

**General procedure for 4a/Rh-catalyzed asymmetric 1,4-additions (Table 2):** To a dried Schlenk flask charged with [RhCl(C<sub>2</sub>H<sub>4</sub>)<sub>2</sub>]<sub>2</sub> (0.0023 g, 0.006 mmol, 1.5 mol %), and ligand **4a** (0.0045 g, 0.0144 mmol, 3.6 mol %) was added CH<sub>3</sub>OH (0.50 mL) under argon. The resulting mixture was stirred at room temperature for 15 min before heated to 30 °C. Then K<sub>3</sub>PO<sub>4</sub>·3H<sub>2</sub>O (0.030 mmol, 0.008 g, 7.5 mol %), arylboronic acid **6** (0.60 mmol), enone **5** (0.4 mmol) and CH<sub>3</sub>OH (1.0 mL) was added sequentially. After stirring at 30 °C for 5 h, the reaction mixture was concentrated under reduced pressure, and the crude residue was purified by flash chromatography on silica gel (hexanes/ethyl ether) to afford the desired product **7**.

**(S)-3-Phenylcyclohexanone (Table 2, entry 1):** light yellow oil;  $[\alpha]_D^{20} = -21.8$  (*c* 0.89, CHCl<sub>3</sub>) (96% ee) [lit.:  $[\alpha]_D^{20} = -21.0$  (*c* 0.96, CHCl<sub>3</sub>) (97% ee) for *S*-isomer]; <sup>1</sup>H NMR (400 MHz, CDCl<sub>3</sub>): δ 7.38-7.29 (m, 2H), 7.27-7.19 (m, 3H), 3.08-2.94 (m, 1H), 2.66-2.31 (m, 4H), 2.20-2.04 (m, 2H), 1.93-1.71 (m, 2H); <sup>13</sup>C NMR (100 MHz, CDCl<sub>3</sub>): δ 211.2, 144.5, 128.9, 126.9, 126.8, 49.1, 44.9, 41.4, 33.0, 25.7.

Y. Takaya, M. Ogasawara and T. Hayashi, *J. Am. Chem. Soc.*, 1998, **120**, 5579.

**(S)-3-*p*-Tolylcyclohexanone (Table 2, entry 2):** light yellow solid;  $[\alpha]_D^{20} = -17.8$  (*c* 0.85, CHCl<sub>3</sub>) (96% ee) [lit.:  $[\alpha]_D^{20} = -17.0$  (*c* 0.95, CHCl<sub>3</sub>) (97% ee) for *S*-isomer]; <sup>1</sup>H NMR (400 MHz, CDCl<sub>3</sub>): δ 7.15 (d, *J* = 13.2 Hz, 2H), 7.13 (d, *J* = 13.2 Hz, 2H), 3.04-2.92 (m, 1H), 2.63-2.36 (m, 4H), 2.34 (s, 1H), 2.20-2.03 (m, 2H), 1.90-1.70 (m, 2H); <sup>13</sup>C NMR (100 MHz, CDCl<sub>3</sub>): δ 211.2, 141.6, 136.4, 129.5, 126.6, 49.2, 44.5, 41.3, 33.1, 25.7, 21.1.

Y. Takaya, M. Ogasawara and T. Hayashi, *J. Am. Chem. Soc.*, 1998, **120**, 5579.

**(S)-3-(Biphenyl-4-yl)cyclohexanone (Table 2, entry 3):** white solid;  $[\alpha]_{\text{D}}^{20} = -8.8$  ( $c$  1.00,  $\text{CHCl}_3$ ) (98% ee) [lit.:  $[\alpha]_{\text{D}}^{25} = -5.5$  ( $c$  0.50,  $\text{CHCl}_3$ ) (93% ee) for *S*-isomer];  $^1\text{H}$  NMR (400 MHz,  $\text{CDCl}_3$ ):  $\delta$  7.57 (t,  $J = 8.0$  Hz, 4H), 7.43 (t,  $J = 7.2$  Hz, 2H), 7.36-7.27 (m, 3H), 3.13-2.97 (m, 1H), 2.68-2.33 (m, 4H), 2.21-2.08 (m, 2H), 1.93-1.73 (m, 2H);  $^{13}\text{C}$  NMR (100 MHz,  $\text{CDCl}_3$ ):  $\delta$  211.1, 143.6, 141.0, 139.9, 129.0, 127.6, 127.4, 127.2, 49.1, 44.6, 41.4, 33.0, 25.7.

T. Zhang and M. Shi, *Chem.-Eur. J.*, 2008, **14**, 3759.

**(S)-3-(4-Fluorophenyl)cyclohexanone (Table 2, entry 4):** colorless oil;  $[\alpha]_{\text{D}}^{20} = -17.5$  ( $c$  0.61,  $\text{CHCl}_3$ ) (96% ee) [lit.:  $[\alpha]_{\text{D}}^{20} = +14.3$  ( $c$  1.20,  $\text{CHCl}_3$ ) (98% ee) for *R*-isomer];  $^1\text{H}$  NMR (400 MHz,  $\text{CDCl}_3$ ):  $\delta$  7.22-7.13 (m, 2H), 7.05-6.95 (m, 2H), 3.06-2.92 (m, 1H), 2.61-2.30 (m, 4H), 2.18-2.02 (m, 2H), 1.88-1.70 (m, 2H);  $^{13}\text{C}$  NMR (100 MHz,  $\text{CDCl}_3$ ):  $\delta$  210.7, 161.7 (d,  $J_{\text{C-F}} = 243.4$  Hz), 140.2 (d,  $J_{\text{C-F}} = 3.1$  Hz), 128.1 (d,  $J_{\text{C-F}} = 7.8$  Hz), 115.6 (d,  $J_{\text{C-F}} = 20.9$  Hz), 49.2, 44.1, 41.2, 33.1, 25.5.

M. Pucheault, S. Darses and J. P. Genêt, *Eur. J. Org. Chem.*, 2002, 3552.

**(S)-3-[4-(Trifluoromethyl)phenyl]cyclohexanone (Table 2, entry 5):** light yellow solid;  $[\alpha]_{\text{D}}^{20} = -25.7$  ( $c$  0.98,  $\text{CHCl}_3$ ) (96% ee) [lit.:  $[\alpha]_{\text{D}}^{20} = -11.0$  ( $c$  0.97,  $\text{CHCl}_3$ ) (99% ee) for *S*-isomer];  $^1\text{H}$  NMR (400 MHz,  $\text{CDCl}_3$ ):  $\delta$  7.58 (d,  $J = 8.4$  Hz, 2H), 7.33 (d,  $J = 8.4$  Hz, 2H), 3.12-3.02 (m, 1H), 2.64-2.31 (m, 4H), 2.19-2.03 (m, 2H), 1.93-1.69 (m, 2H);  $^{13}\text{C}$  NMR (100 MHz,  $\text{CDCl}_3$ ):  $\delta$  210.3, 148.4, 129.2 (q,  $J_{\text{C-F}} = 32.4$  Hz), 127.2, 125.8 (q,  $J_{\text{C-F}} = 3.9$  Hz), 124.3 (q,  $J_{\text{C-F}} = 270.4$  Hz), 123.0, 48.7, 44.7, 41.3, 32.7, 25.6.

Y. Takaya, M. Ogasawara and T. Hayashi, *J. Am. Chem. Soc.*, 1998, **120**, 5579.

**(S)-3-(4-Acetylphenyl)cyclohexanone (Table 2, entry 6):** white solid;  $[\alpha]_{\text{D}}^{20} = -7.3$  ( $c$  0.74,  $\text{CHCl}_3$ ) (94% ee) [lit.:  $[\alpha]_{\text{D}}^{32} = -7.8$  ( $c$  1.02,  $\text{CHCl}_3$ ) (97% ee) for *S*-isomer];  $^1\text{H}$  NMR (400 MHz,  $\text{CDCl}_3$ ):  $\delta$  7.90 (d,  $J = 8.4$  Hz, 2H), 7.30 (d,  $J = 8.0$  Hz, 2H), 3.11-2.98 (m, 1H), 2.60-2.32 (m, 6H), 2.58 (s, 3H), 2.19-2.03 (m, 2H), 1.92-1.78 (m, 2H);  $^{13}\text{C}$  NMR (100 MHz,  $\text{CDCl}_3$ ):  $\delta$  210.4, 197.7, 149.8, 135.9, 129.0, 127.0, 48.5, 44.8, 41.2, 32.6, 26.7, 25.5.

C. Defieber, J.-F. Paquin, S. Serna and E. M. Carreira, *Org. Lett.*, 2004, **6**, 3873.

**(S)-3-[4-(Hydroxymethyl)phenyl]cyclohexanone (Table 2, entry 7):** colorless oil;  $[\alpha]_{\text{D}}^{20} = -11.4$  ( $c$  0.86,  $\text{CHCl}_3$ ) (95% ee) [lit.:  $[\alpha]_{\text{D}}^{20} = -18.8$  ( $c$  0.97,  $\text{CHCl}_3$ ) (92% ee) for *S*-isomer];  $^1\text{H}$  NMR (400 MHz,  $\text{CDCl}_3$ ):  $\delta$  7.32 (d,  $J = 8.0$  Hz, 2H), 7.20 (d,  $J = 8.0$  Hz, 2H), 4.66 (s, 2H), 3.05-2.94 (m, 1H), 2.60-2.31 (m, 4H), 2.17-2.03 (m, 3H), 1.90-1.67 (m, 2H);  $^{13}\text{C}$  NMR (100 MHz,  $\text{CDCl}_3$ ):  $\delta$  211.4, 143.9, 139.6, 127.6, 126.9, 65.1, 49.1, 44.6, 41.3, 32.9, 25.7.

Q. Li, Z. Dong and Z.-X. Yu, *Org. Lett.*, 2011, **13**, 1122.

**(S)-3-(1-Naphthyl)cyclohexanone (Table 2, entry 8):** white solid;  $[\alpha]_{\text{D}}^{20} = -56.0$  ( $c$  1.00,  $\text{CHCl}_3$ ) (95% ee) [lit.:  $[\alpha]_{\text{D}} = +45.8$  ( $c$  1.5,  $\text{CHCl}_3$ ) (98% ee) for *R*-isomer];  $^1\text{H}$  NMR (400 MHz,  $\text{CDCl}_3$ ):  $\delta$  8.05 (d,  $J =$

8.4 Hz, 1H), 7.88 (d,  $J = 8.8$  Hz, 1H), 7.76 (d,  $J = 8.0$  Hz, 1H), 7.58-7.44 (m, 3H), 7.40 (d,  $J = 7.2$  Hz, 1H), 3.93-3.80 (m, 1H), 2.83-2.41 (m, 4H), 2.30-2.14 (m, 2H), 2.08-1.85 (m, 2H);  $^{13}\text{C}$  NMR (100 MHz,  $\text{CDCl}_3$ ):  $\delta$  211.3, 140.2, 134.2, 131.1, 129.3, 127.4, 126.4, 125.8, 125.7, 122.9, 122.6, 48.7, 41.6, 39.6, 32.5, 25.8.

C. S. Cho, S. Motofusa, K. Ohe, S. Uemura and S. C. Shim, *J. Org. Chem.*, 1995, **60**, 883.

**(S)-3-(2-Naphthyl)cyclohexanone (Table 2, entry 9)**: white solid;  $[\alpha]_{\text{D}}^{20} = -8.1$  ( $c$  1.08,  $\text{CHCl}_3$ ) (92% ee) [lit.:  $[\alpha]_{\text{D}}^{20} = -8.3$  ( $c$  0.89,  $\text{CHCl}_3$ ) (99% ee) for *S*-isomer];  $^1\text{H}$  NMR (400 MHz,  $\text{CDCl}_3$ ):  $\delta$  7.87-7.78 (m, 3H), 7.65 (s, 1H), 7.52-7.41 (m, 2H), 7.37 (dd,  $J = 8.4, 1.6$  Hz, 1H), 3.25-3.12 (m, 1H), 2.74-2.59 (m, 2H), 2.55-2.36 (m, 2H), 2.24-2.12 (m, 2H), 2.04-1.76 (m, 2H);  $^{13}\text{C}$  NMR (100 MHz,  $\text{CDCl}_3$ ):  $\delta$  211.0, 141.9, 133.7, 132.6, 128.5, 127.9, 127.8, 126.4, 125.8, 125.5, 124.9, 49.0, 45.0, 41.4, 32.9, 25.7.

Y. Takaya, M. Ogasawara and T. Hayashi, *Tetrahedron Lett.* 1999, **40**, 6957.

**(S)-3-*o*-Methoxyphenylcyclohexanone (Table 2, entry 10)**: colorless oil;  $[\alpha]_{\text{D}}^{20} = -37.8$  ( $c$  0.63,  $\text{CHCl}_3$ ) (92% ee) [lit.:  $[\alpha]_{\text{D}}^{32} = -36.3$  ( $c$  1.02,  $\text{CHCl}_3$ ) (94% ee) for *S*-isomer];  $^1\text{H}$  NMR (400 MHz,  $\text{CDCl}_3$ ):  $\delta$  7.25-7.14 (m, 2H), 6.94 (dd,  $J = 8.0, 7.2$  Hz, 1H), 6.87 (d,  $J = 8.0$  Hz, 1H), 3.82 (s, 3H), 3.49-3.35 (m, 1H), 2.63-2.31 (m, 4H), 2.18-1.98 (m, 2H), 1.94-1.71 (m, 2H);  $^{13}\text{C}$  NMR (100 MHz,  $\text{CDCl}_3$ ):  $\delta$  211.8, 156.9, 132.7, 127.7, 126.7, 120.9, 110.8, 55.4, 47.8, 41.6, 38.2, 31.2, 25.8.

C. Defieber, J.-F. Paquin, S. Serna and E. M. Carreira, *Org. Lett.*, 2004, **6**, 3873.

**(S)-3-*o*-Tolylcyclohexanone (Table 2, entry 11)**: colorless oil;  $[\alpha]_{\text{D}}^{20} = -40.8$  ( $c$  1.16,  $\text{CHCl}_3$ ) (90% ee) [lit.:  $[\alpha]_{\text{D}} = -15.0$  ( $c$  0.87,  $\text{CHCl}_3$ ) (95% ee) for *S*-isomer];  $^1\text{H}$  NMR (400 MHz,  $\text{CDCl}_3$ ):  $\delta$  7.24-7.07 (m, 4H), 3.24-3.15 (m, 1H), 2.52-2.31 (m, 4H), 2.31 (s, 3H), 2.18-2.11 (m, 1H), 2.03-1.95 (m, 1H), 1.88-1.72 (m, 2H);  $^{13}\text{C}$  NMR (100 MHz,  $\text{CDCl}_3$ ):  $\delta$  211.6, 142.4, 135.1, 130.7, 126.5, 126.4, 125.2, 48.4, 41.4, 40.4, 32.1, 25.8, 19.3.

Y. Ma, C. Song, C. Ma, Z. Sun, Q. Chai and M. B. Andrus, *Angew. Chem., Int. Ed.*, 2003, **42**, 5871.

**(S)-3-(2-Chlorophenyl)cyclohexanone (Table 2, entry 12)**: colorless oil;  $[\alpha]_{\text{D}}^{20} = -41.4$  ( $c$  1.07,  $\text{CHCl}_3$ ) (94% ee) [lit.:  $[\alpha]_{\text{D}}^{20} = -21.5$  ( $c$  1.3,  $\text{CHCl}_3$ ) (64% ee) for *S*-isomer];  $^1\text{H}$  NMR (400 MHz,  $\text{CDCl}_3$ ):  $\delta$  7.35 (d,  $J = 8.0$  Hz, 1H), 7.30-7.22 (m, 2H), 7.19-7.12 (m, 1H), 3.58-3.43 (m, 1H), 2.65-2.56 (m, 1H), 2.53-2.31 (m, 3H), 2.19-2.01 (m, 2H), 1.91-1.72 (m, 2H);  $^{13}\text{C}$  NMR (100 MHz,  $\text{CDCl}_3$ ):  $\delta$  210.5, 141.4, 133.6, 130.0, 127.9, 127.4, 127.1, 47.4, 41.4, 40.7, 31.4, 25.4.

X. Hu, M. Zhuang, Z. Cao and H. Du, *Org. Lett.*, 2009, **11**, 4744.

**(S)-3-*m*-Tolylcyclohexanone (Table 2, entry 13)**: colorless oil;  $[\alpha]_{\text{D}}^{20} = -19.6$  ( $c$  1.10,  $\text{CHCl}_3$ ) (96% ee) [lit.:  $[\alpha]_{\text{D}}^{20} = -15.6$  ( $c$  0.95,  $\text{CHCl}_3$ ) (82% ee) for *S*-isomer];  $^1\text{H}$  NMR (400 MHz,  $\text{CDCl}_3$ ):  $\delta$  7.26-7.17 (m, 1H), 7.07-6.95 (m, 3H), 3.01-2.88 (m, 1H), 2.62-2.29 (m, 4H), 2.34 (s, 3H), 2.18-2.00 (m, 2H), 1.90-1.68

(m, 2H);  $^{13}\text{C}$  NMR (100 MHz,  $\text{CDCl}_3$ ):  $\delta$  211.1, 144.5, 138.3, 128.7, 127.5, 127.4, 123.7, 49.1, 44.8, 41.3, 32.9, 25.7, 21.6.

X. Hu, M. Zhuang, Z. Cao and H. Du, *Org. Lett.*, 2009, **11**, 4744.

**(S)-3-(3-Fluorophenyl)cyclohexanone (Table 2, entry 14)**: colorless oil;  $[\alpha]_{\text{D}}^{20} = -18.9$  (*c* 0.85,  $\text{CHCl}_3$ ) (96% ee);  $^1\text{H}$  NMR (400 MHz,  $\text{CDCl}_3$ ):  $\delta$  7.33-7.23 (m, 1H), 6.99 (d, *J* = 8.0 Hz, 1H), 6.96-6.88 (m, 2H), 3.06-2.95 (m, 1H), 2.64-2.31 (m, 4H), 2.19-2.04 (m, 2H), 1.89- 1.70 (m, 2H);  $^{13}\text{C}$  NMR (100 MHz,  $\text{CDCl}_3$ ):  $\delta$  210.5, 163.2 (d,  $J_{\text{C-F}} = 244.6$  Hz), 140.1 (d,  $J_{\text{C-F}} = 6.8$  Hz), 130.3 (d,  $J_{\text{C-F}} = 8.3$  Hz), 113.8 (d,  $J_{\text{C-F}} = 6.2$  Hz), 113.6 (d,  $J_{\text{C-F}} = 6.7$  Hz), 48.9, 44.6, 41.3, 32.8, 25.6.

J.-G. Boiteau, R. Imbos, A. J. Minnaard and B. L. Feringa, *Org. Lett.*, 2003, **5**, 681.

**(S)-3-(3,5-Dimethylphenyl)cyclohexanone (Table 2, entry 15)**: colorless oil;  $[\alpha]_{\text{D}}^{20} = -17.5$  (*c* 1.10,  $\text{CHCl}_3$ ) (97% ee) [lit.:  $[\alpha]_{\text{D}}^{25} = +14.3$  (*c* 1.60,  $\text{CHCl}_3$ ) (96% ee) for *R*-isomer];  $^1\text{H}$  NMR (400 MHz,  $\text{CDCl}_3$ ):  $\delta$  6.88 (s, 1H), 6.84 (s, 2H), 2.99-2.86 (m, 1H), 2.61-2.33 (m, 4H), 2.31 (s, 6H), 2.20-2.01 (m, 2H), 1.91-1.69 (m, 2H);  $^{13}\text{C}$  NMR (100 MHz,  $\text{CDCl}_3$ ):  $\delta$  211.3, 144.6, 138.4, 128.5, 124.6, 49.2, 44.9, 41.4, 33.1, 25.8, 21.5.

F. Lang, D. Li, J. Chen, J. Chen, L. Li, L. Cun, J. Zhu, J. Deng and J. Liao, *Adv. Synth. Catal.*, 2010, **352**, 843.

**(S)-3-(2,4-Dimethoxyphenyl)cyclohexanone (Table 2, entry 16)**: colorless oil;  $[\alpha]_{\text{D}}^{20} = -40.7$  (*c* 0.55,  $\text{CHCl}_3$ ) (90% ee) [lit.:  $[\alpha]_{\text{D}}^{20} = -25.4$  (*c* 0.97,  $\text{CHCl}_3$ ) (87% ee) for *S*-isomer];  $^1\text{H}$  NMR (400 MHz,  $\text{CDCl}_3$ ):  $\delta$  7.06 (d, *J* = 9.2 Hz, 1H), 6.46 (d, *J* = 9.6 Hz, 1H), 6.45 (s, 1H), 3.79 (s, 6H), 3.36-3.25 (m, 1H), 2.59-2.30 (m, 4H), 2.14-1.96 (m, 2H), 1.89-1.70 (m, 2H);  $^{13}\text{C}$  NMR (100 MHz,  $\text{CDCl}_3$ ):  $\delta$  212.0, 157.9, 127.1, 125.3, 104.2, 98.9, 55.5, 55.4, 48.0, 41.6, 37.8, 31.4, 25.7.

Q. Li, Z. Dong and Z.-X. Yu, *Org. Lett.*, 2011, **13**, 1122.

**(S)-3-Phenylcyclopentanone (Table 2, entry 17)**: colorless oil;  $[\alpha]_{\text{D}}^{20} = -86.6$  (*c* 0.94,  $\text{CHCl}_3$ ) (91% ee) [lit.:  $[\alpha]_{\text{D}}^{20} = -73.8$  (*c* 0.82,  $\text{CHCl}_3$ ) (97% ee) for *S*-isomer];  $^1\text{H}$  NMR (400 MHz,  $\text{CDCl}_3$ ):  $\delta$  7.38-7.30 (m, 2H), 7.29-7.21 (m, 3H), 3.48-3.34 (m, 1H), 2.66 (dd, *J* = 18.4, 8.0 Hz, 1H), 2.52-2.39 (m, 2H), 2.39-2.23 (m, 2H), 2.06-1.92 (m, 1H);  $^{13}\text{C}$  NMR (100 MHz,  $\text{CDCl}_3$ ):  $\delta$  218.5, 143.2, 128.9, 126.9, 46.0, 42.4, 39.0, 31.4.

Y. Takaya, M. Ogasawara and T. Hayashi, *J. Am. Chem. Soc.*, 1998, **120**, 5579.

**(S)-3-*p*-Tolylcyclopentanone (Table 2, entry 18)**: colorless oil;  $[\alpha]_{\text{D}}^{20} = -78.6$  (*c* 1.03,  $\text{CHCl}_3$ ) (89% ee) [lit.:  $[\alpha]_{\text{D}}^{24} = -81.0$  (*c* 1.16,  $\text{CHCl}_3$ ) (93% ee) for *S*-isomer];  $^1\text{H}$  NMR (400 MHz,  $\text{CDCl}_3$ ):  $\delta$  7.16 (s, 4H), 3.46-3.31 (m, 1H), 2.66 (dd, *J* = 18.4, 7.6 Hz, 1H), 2.52-2.23 (m, 4H), 2.35 (s, 3H), 2.04-1.89 (m, 1H);  $^{13}\text{C}$  NMR (100 MHz,  $\text{CDCl}_3$ ):  $\delta$  218.7, 140.2, 136.5, 129.5, 126.8, 46.1, 42.0, 39.0, 31.5, 21.1.

Y. Takaya, M. Ogasawara, and T. Hayashi, *Tetrahedron Lett.*, 1999, **40**, 6957.

**(S)-4-Phenyltetrahydro-2H-pyran-2-one (Table 2, entry 19)**: colorless oil;  $[\alpha]_{\text{D}}^{20} = -4.2$  (*c* 0.90, CHCl<sub>3</sub>) (97% ee) [lit.:  $[\alpha]_{\text{D}}^{25} = +4.0$  (*c* 2.70, CHCl<sub>3</sub>) (98% ee) for *S*-isomer]; <sup>1</sup>H NMR (400 MHz, CDCl<sub>3</sub>): δ 7.40-7.32 (m, 2H), 7.31-7.24 (m, 1H), 7.23-7.17 (m, 2H), 4.56-4.46 (m, 1H), 4.44-4.34 (m, 1H), 3.30-3.18 (m, 1H), 2.98-2.86 (m, 1H), 2.64 (dd, *J* = 17.6, 10.4 Hz, 1H), 2.24-2.13 (m, 1H), 2.11-1.97 (m, 1H); <sup>13</sup>C NMR (100 MHz, CDCl<sub>3</sub>): δ 170.9, 143.0, 129.2, 127.4, 126.7, 68.8, 37.7, 37.6, 30.5.

Y. Takaya, T. Senda, H. Kurushima, M. Ogasawara and T. Hayashi, *Tetrahedron: Asymmetry*, 1999, **10**, 4047.

**(S)-4-Phenylheptan-2-one (Table 2, entry 20)**: colorless oil;  $[\alpha]_{\text{D}}^{20} = +21.2$  (*c* 1.20, CHCl<sub>3</sub>) (60% ee) [lit.:  $[\alpha]_{\text{D}}^{23} = -37.0$  (*c* 1.01, CHCl<sub>3</sub>) (75% ee) for *R*-isomer]; <sup>1</sup>H NMR (400 MHz, CDCl<sub>3</sub>): δ 7.31-7.23 (m, 2H), 7.21-7.14 (m, 3H), 3.16-3.09 (m, 1H), 2.73-2.67 (m, 2H), 2.00 (s, 3H), 1.62-1.51 (m, 2H), 1.21-1.11 (m, 2H), 0.84 (t, *J* = 7.2 Hz, 3H); <sup>13</sup>C NMR (100 MHz, CDCl<sub>3</sub>): δ 208.1, 144.8, 128.6, 127.7, 126.5, 51.1, 41.3, 38.9, 30.8, 20.7, 14.1.

S. Oi, A. Taira, Y. Honma and Y. Inoue, *Org. Lett.*, 2003, **5**, 97.

**(S)-4-Phenylnonan-2-one (Table 2, entry 21)**: colorless oil;  $[\alpha]_{\text{D}}^{20} = -79.5$  (*c* 0.79, CHCl<sub>3</sub>) (60% ee) [lit.:  $[\alpha]_{\text{D}} = -17.0$  (*c* 1.26, CHCl<sub>3</sub>) (92% ee)]; <sup>1</sup>H NMR (400 MHz, CDCl<sub>3</sub>): δ 7.28 (t, *J* = 8.0 Hz, 2H), 7.22-7.12 (m, 3H), 3.16-3.05 (m, 1H), 2.78-2.63 (m, 2H), 2.00 (s, 3H), 1.67-1.58 (m, 2H), 1.27-1.05 (m, 6H), 0.89-0.75 (m, 3H); <sup>13</sup>C NMR (100 MHz, CDCl<sub>3</sub>): δ 208.2, 144.8, 128.6, 127.6, 126.5, 51.1, 41.5, 36.6, 31.9, 30.8, 27.2, 22.7, 14.2.

Y. Takaya, M. Ogasawara and T. Hayashi, *J. Am. Chem. Soc.*, 1998, **120**, 5579.



The chromatograms for determination of the enantiomeric excess

Table 2, entry 1

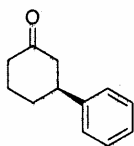

HPLC Conditions: Column: Chiralpak AD-H, Daicel Chemical Industries, Ltd.,  
 Eluent: Hexanes/IPA (99/1); Flow rate: 1.0 mL/min; Detection: UV 210 nm

Racemic

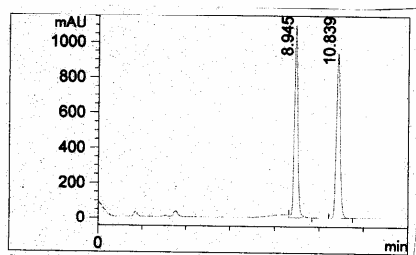

| Peak # | RT [min] | Area % | Area    |
|--------|----------|--------|---------|
| 1      | 8.945    | 50.781 | 1.151e4 |
| 2      | 10.839   | 49.219 | 1.116e4 |

Chiral

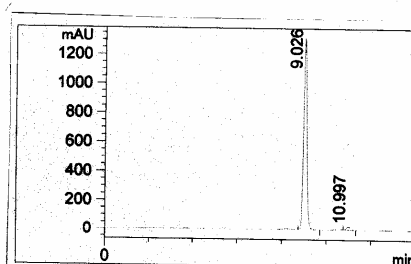

| Peak # | RT [min] | Area % | Area    |
|--------|----------|--------|---------|
| 1      | 9.026    | 98.173 | 1.354e4 |
| 2      | 10.997   | 1.827  | 251.912 |

Table 2, entry 2

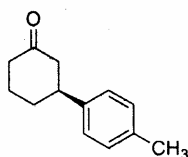

HPLC Conditions: Column: Chiralpak AD-H, Daicel Chemical Industries, Ltd.,  
 Eluent: Hexanes/IPA (97/3); Flow rate: 1.0 mL/min; Detection: UV 214 nm

Racemic

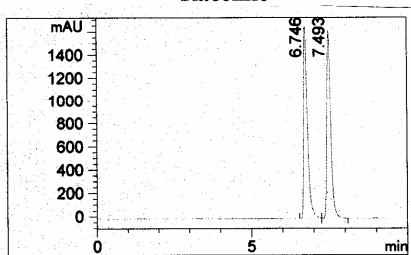

Signal 1: VWD1 A, Wavelength=21

| Peak # | RT [min] | Area % | Area    |
|--------|----------|--------|---------|
| 1      | 6.746    | 50.023 | 1.402e4 |
| 2      | 7.493    | 49.977 | 1.401e4 |

Chiral

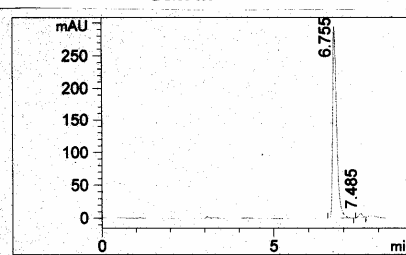

Signal 1: VWD1 A, Wavelength=21

| Peak # | RT [min] | Area % | Area    |
|--------|----------|--------|---------|
| 1      | 6.755    | 98.135 | 2.331e3 |
| 2      | 7.485    | 1.865  | 44.289  |

**Table 2, entry 3**

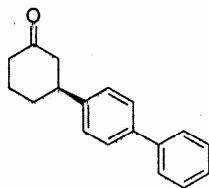

**HPLC Conditions: Column:** Chiralcel OD-H, Daicel Chemical Industries, Ltd.,  
**Eluent:** Hexanes/IPA (98/2); **Flow rate:** 1.0 mL/min; **Detection:** UV 211 nm

**Racemic**

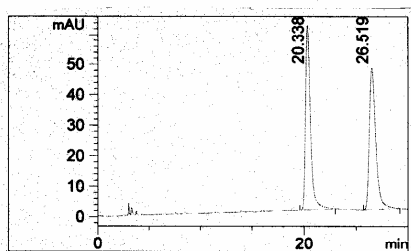

| Peak # | RT [min] | Area % | Area    |
|--------|----------|--------|---------|
| 1      | 20.338   | 50.157 | 2.029e3 |
| 2      | 26.519   | 49.843 | 2.016e3 |

**Chiral**

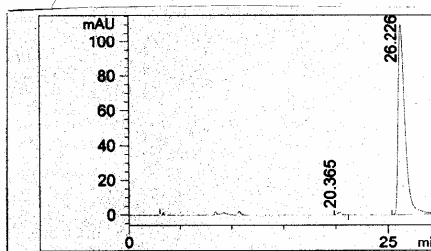

| Peak # | RT [min] | Area % | Area    |
|--------|----------|--------|---------|
| 1      | 20.365   | 0.923  | 46.347  |
| 2      | 26.226   | 99.077 | 4.974e3 |

**Table 2, entry 4**

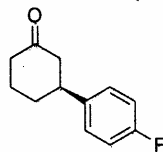

**HPLC Conditions: Column:** Chiralpak AD-H, Daicel Chemical Industries, Ltd.,  
**Eluent:** Hexanes/IPA (97/3); **Flow rate:** 1.0 mL/min; **Detection:** UV 214 nm

**Racemic**

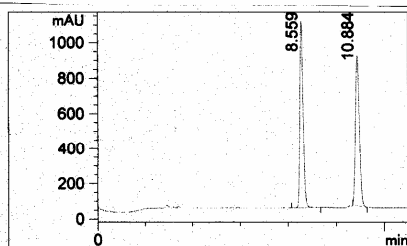

Signal 1: VWD1 A, Wavelength=2

| Peak # | RT [min] | Area % | Area    |
|--------|----------|--------|---------|
| 1      | 8.559    | 50.793 | 9.996e3 |
| 2      | 10.884   | 49.207 | 9.684e3 |

**Chiral**

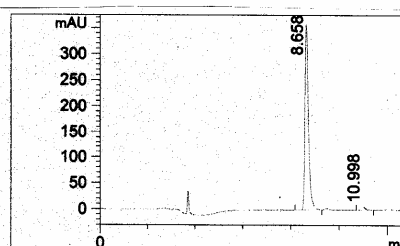

Signal 1: VWD1 A, Wavelength=2

| Peak # | RT [min] | Area % | Area    |
|--------|----------|--------|---------|
| 1      | 8.658    | 98.058 | 3.651e3 |
| 2      | 10.998   | 1.942  | 72.312  |

Table 2, entry 5

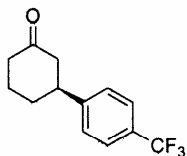

HPLC Conditions: Column: Chiralcel OD-H, Daicel Chemical Industries, Ltd.,  
 Eluent: Hexanes/IPA (99/1); Flow rate: 1.0 mL/min; Detection: UV 218 nm

Racemic

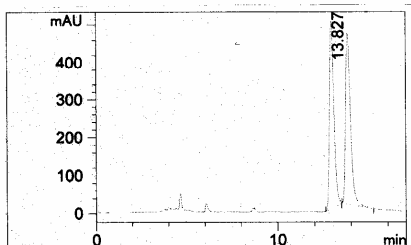

| Peak # | RT [min] | Area % | Area    |
|--------|----------|--------|---------|
| 1      | 12.944   | 49.099 | 8.314e3 |
| 2      | 13.827   | 50.901 | 8.619e3 |

Chiral

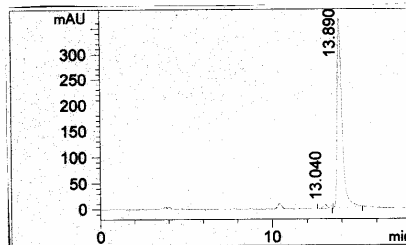

| Peak # | RT [min] | Area % | Area    |
|--------|----------|--------|---------|
| 1      | 13.040   | 1.908  | 137.551 |
| 2      | 13.890   | 98.092 | 7.072e3 |

Table 2, entry 6

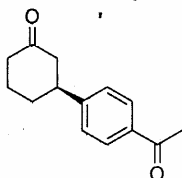

HPLC Conditions: Column: Chiralcel OD-H, Daicel Chemical Industries, Ltd.,  
 Eluent: Hexanes/IPA (90/10); Flow rate: 0.8 mL/min; Detection: UV 210 nm

Racemic

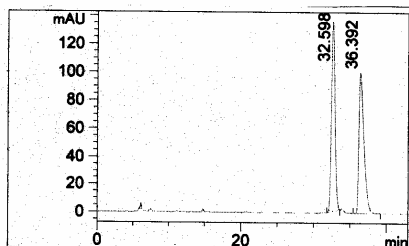

Signal 1: VWD1 A, Wavelength=21

| Peak # | RT [min] | Area % | Area    |
|--------|----------|--------|---------|
| 1      | 32.598   | 49.258 | 4.636e3 |
| 2      | 36.392   | 50.742 | 4.776e3 |

Chiral

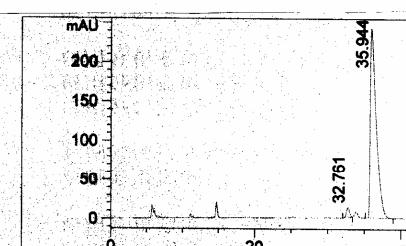

Signal 1: VWD1 A, Wavelength=21

| Peak # | RT [min] | Area % | Area    |
|--------|----------|--------|---------|
| 1      | 32.761   | 2.749  | 382.443 |
| 2      | 35.944   | 97.251 | 1.353e4 |

Table 2, entry 7

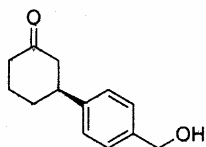

HPLC Conditions: Column: Chiralpak AS-H, Daicel Chemical Industries, Ltd.,  
 Eluent: Hexanes/IPA (60/40); Flow rate: 0.5 mL/min; Detection: UV 210 nm

Racemic

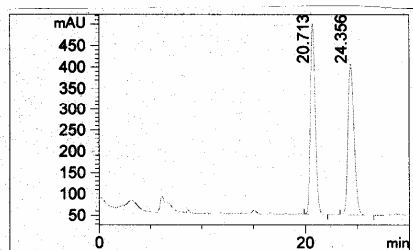

| Peak # | RT [min] | Area % | Area    |
|--------|----------|--------|---------|
| 1      | 20.713   | 50.005 | 1.443e4 |
| 2      | 24.356   | 49.995 | 1.443e4 |

Chiral

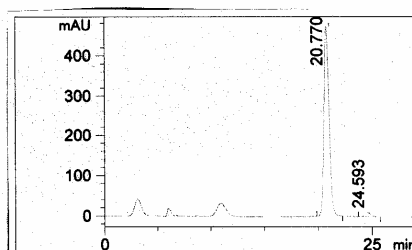

| Peak # | RT [min] | Area % | Area    |
|--------|----------|--------|---------|
| 1      | 20.770   | 97.703 | 1.555e4 |
| 2      | 24.593   | 2.297  | 365.480 |

Table 2, entry 8

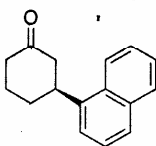

HPLC Conditions: Column: Chiralpak AD-H, Daicel Chemical Industries, Ltd.,  
 Eluent: Hexanes/IPA (95/5); Flow rate: 0.7 mL/min; Detection: UV 222 nm

Racemic

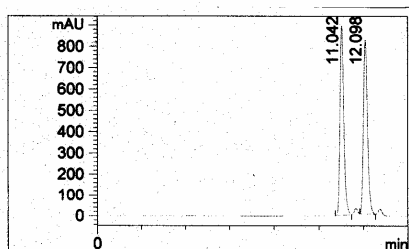

Signal 1: VWD1 A, Wavelength=222

| Peak # | RT [min] | Area % | Area    |
|--------|----------|--------|---------|
| 1      | 11.042   | 50.293 | 1.070e4 |
| 2      | 12.098   | 49.707 | 1.058e4 |

Chiral

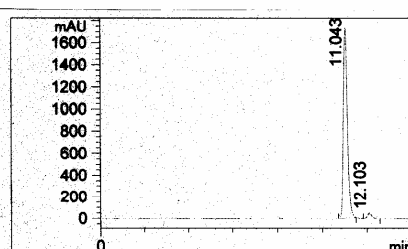

Signal 1: VWD1 A, Wavelength=222

| Peak # | RT [min] | Area % | Area    |
|--------|----------|--------|---------|
| 1      | 11.043   | 97.198 | 2.159e4 |
| 2      | 12.103   | 2.802  | 622.485 |

Table 2, entry 9

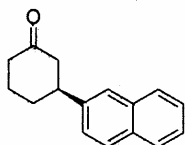

HPLC Conditions: Column: Chiralpak AD-H, Daicel Chemical Industries, Ltd.,  
 Eluent: Hexanes/IPA ( 85/15 ); Flow rate: 0.5 mL/min; Detection: UV 221 nm

Racemic

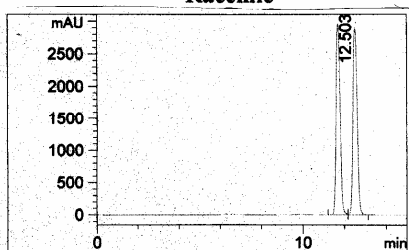

| Peak # | RT [min] | Area % | Area    |
|--------|----------|--------|---------|
| 1      | 11.689   | 49.542 | 4.016e4 |
| 2      | 12.503   | 50.458 | 4.090e4 |

Chiral

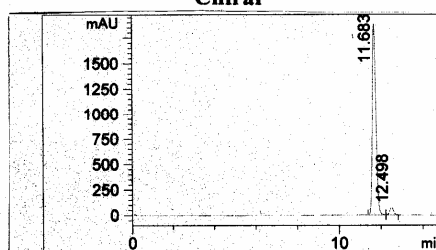

| Peak # | RT [min] | Area % | Area    |
|--------|----------|--------|---------|
| 1      | 11.683   | 95.994 | 2.240e4 |
| 2      | 12.498   | 4.006  | 934.688 |

Table 2, entry 10

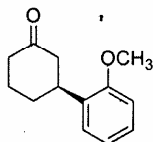

HPLC Conditions: Column: Chiralpak AD-H, Daicel Chemical Industries, Ltd.,  
 Eluent: Hexanes/IPA ( 99/1 ); Flow rate: 0.7 mL/min; Detection: UV 217 nm

Racemic

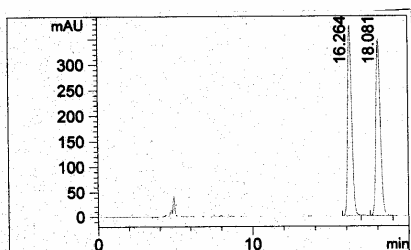

Signal 1: VWD1 A, Wavelength=21

| Peak # | RT [min] | Area % | Area    |
|--------|----------|--------|---------|
| 1      | 16.264   | 49.472 | 6.805e3 |
| 2      | 18.081   | 50.528 | 6.950e3 |

Chiral

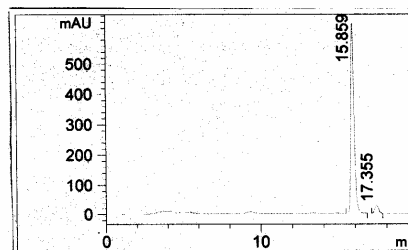

Signal 1: VWD1 A, Wavelength=21

| Peak # | RT [min] | Area % | Area    |
|--------|----------|--------|---------|
| 1      | 15.859   | 95.640 | 9.361e3 |
| 2      | 17.355   | 4.360  | 426.786 |

Table 2, entry 11

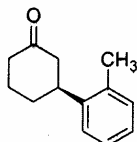

HPLC Conditions: Column: Chiralpak AD-H, Daicel Chemical Industries, Ltd.,  
 Eluent: Hexanes/IPA (85/15); Flow rate: 0.5 mL/min; Detection: UV 254 nm

Racemic

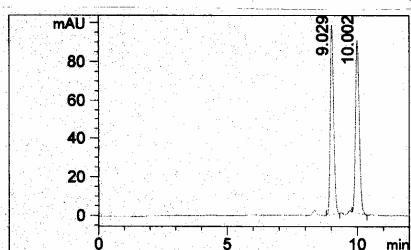

| Peak # | RT [min] | Area % | Area    |
|--------|----------|--------|---------|
| 1      | 9.029    | 49.693 | 885.172 |
| 2      | 10.002   | 50.307 | 896.126 |

Chiral

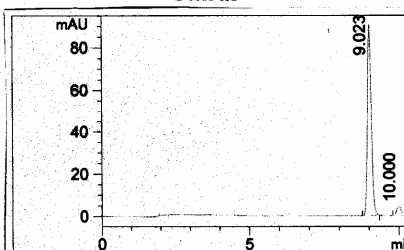

| Peak # | RT [min] | Area % | Area    |
|--------|----------|--------|---------|
| 1      | 9.023    | 94.381 | 812.544 |
| 2      | 10.000   | 5.619  | 48.376  |

Table 2, entry 12

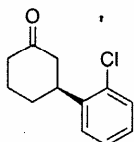

HPLC Conditions: Column: Chiralpak AD-H, Daicel Chemical Industries, Ltd.,  
 Eluent: Hexanes/IPA (97/3); Flow rate: 1.0 mL/min; Detection: UV 214 nm

Racemic

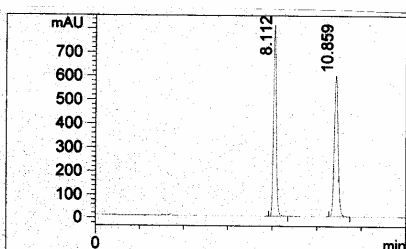

Signal 1: VWD1 A, Wavelength=214

| Peak # | RT [min] | Area % | Area    |
|--------|----------|--------|---------|
| 1      | 8.112    | 49.970 | 7.031e3 |
| 2      | 10.859   | 50.030 | 7.040e3 |

Chiral

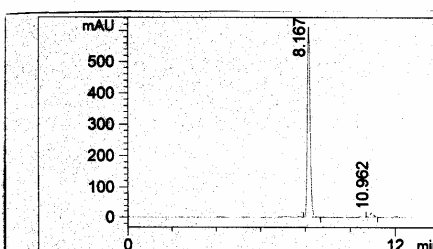

Signal 1: VWD1 A, Wavelength=214

| Peak # | RT [min] | Area % | Area    |
|--------|----------|--------|---------|
| 1      | 8.167    | 97.171 | 5.341e3 |
| 2      | 10.962   | 2.829  | 155.495 |

Table 2, entry 13

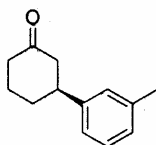

HPLC Conditions: Column: Chiralpak AD-H, Daicel Chemical Industries, Ltd.,  
 Eluent: Hexanes/IPA (97/3); Flow rate: 1.0 mL/min; Detection: UV 212 nm

Racemic

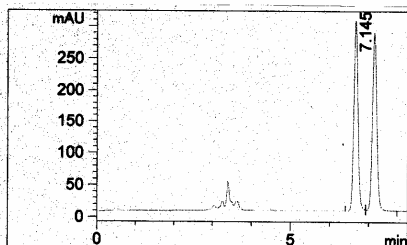

Signal 1: VWD1 A, Wavelength=212

| Peak # | RT [min] | Area % | Area    |
|--------|----------|--------|---------|
| 1      | 6.666    | 49.668 | 2.182e3 |
| 2      | 7.145    | 50.332 | 2.212e3 |

Chiral

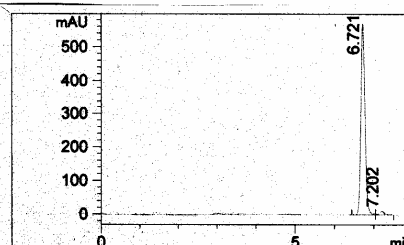

Signal 1: VWD1 A, Wavelength=212

| Peak # | RT [min] | Area % | Area    |
|--------|----------|--------|---------|
| 1      | 6.721    | 97.964 | 4.163e3 |
| 2      | 7.202    | 2.036  | 86.533  |

Table 2, entry 14

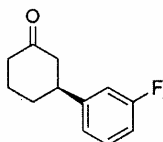

HPLC Conditions: Column: Chiralpak AD-H, Daicel Chemical Industries, Ltd.,  
 Eluent: Hexanes/IPA (97/3); Flow rate: 1.0 mL/min; Detection: UV 214 nm

Racemic

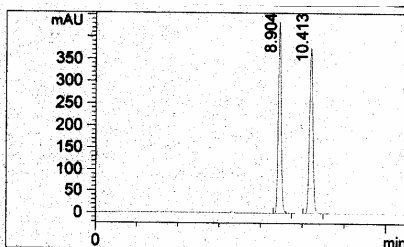

Signal 1: VWD1 A, Wavelength=214

| Peak # | RT [min] | Area % | Area    |
|--------|----------|--------|---------|
| 1      | 8.904    | 49.860 | 4.258e3 |
| 2      | 10.413   | 50.140 | 4.282e3 |

Chiral

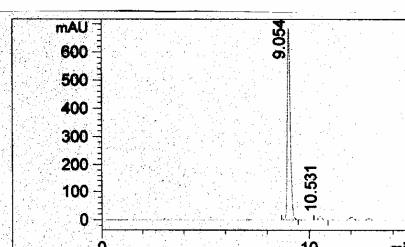

Signal 1: VWD1 A, Wavelength=214

| Peak # | RT [min] | Area % | Area    |
|--------|----------|--------|---------|
| 1      | 9.054    | 97.873 | 6.710e3 |
| 2      | 10.531   | 2.127  | 145.841 |

**Table 2, entry 15**

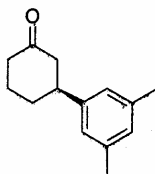

**HPLC Conditions: Column:** Chiralcel OD-H, Daicel Chemical Industries, Ltd.,  
**Eluent:** Hexanes/IPA (99/1); **Flow rate:** 1.0 mL/min; **Detection:** UV 208 nm

**Racemic**

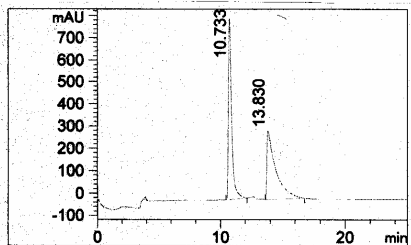

| Peak # | RT [min] | Area % | Area    |
|--------|----------|--------|---------|
| 1      | 10.733   | 49.583 | 1.472e4 |
| 2      | 13.830   | 50.417 | 1.497e4 |

**Chiral**

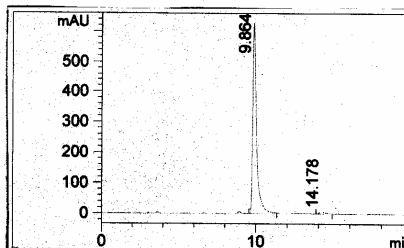

| Peak # | RT [min] | Area % | Area    |
|--------|----------|--------|---------|
| 1      | 9.864    | 98.445 | 1.051e4 |
| 2      | 14.178   | 1.555  | 166.006 |

**Table 2, entry 16**

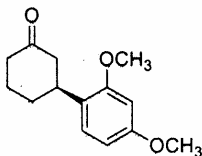

**HPLC Conditions: Column:** Chiralcel OD-H, Daicel Chemical Industries, Ltd.,  
**Eluent:** Hexanes/IPA (95/5); **Flow rate:** 1.0 mL/min; **Detection:** UV 228 nm

**Racemic**

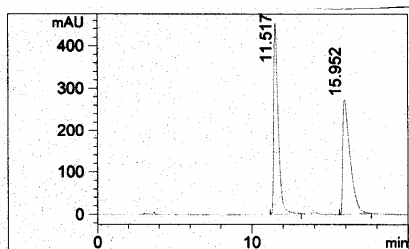

Signal 1: VWD1 A, Wavelength=228 nm

| Peak # | RT [min] | Area % | Area    |
|--------|----------|--------|---------|
| 1      | 11.517   | 50.168 | 8.905e3 |
| 2      | 15.952   | 49.832 | 8.845e3 |

**Chiral**

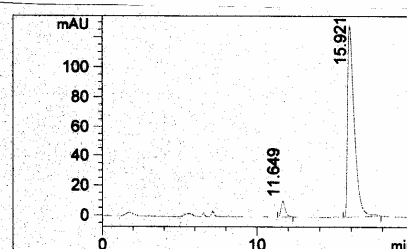

Signal 1: VWD1 A, Wavelength=228 nm

| Peak # | RT [min] | Area % | Area    |
|--------|----------|--------|---------|
| 1      | 11.649   | 4.891  | 196.077 |
| 2      | 15.921   | 95.109 | 3.813e3 |



Table 2, entry 17

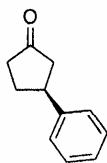

**HPLC Conditions:** Column: Chiralcel OB-H, Daicel Chemical Industries, Ltd.,  
 Eluent: Hexanes/IPA ( 99/1 ); Flow rate: 0.5 mL/min; Detection: UV 219 nm

**Racemic**

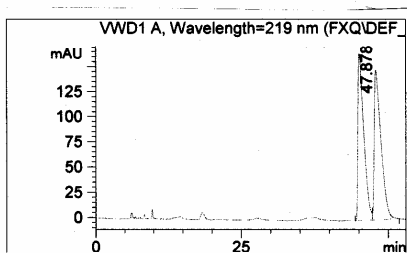

| Peak # | RT [min] | Area % | Area    |
|--------|----------|--------|---------|
| 1      | 45.057   | 49.343 | 1.150e4 |
| 2      | 47.878   | 50.657 | 1.181e4 |

**Chiral**

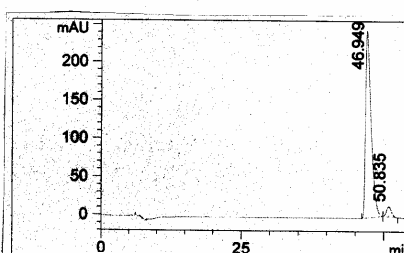

| Peak # | RT [min] | Area % | Area    |
|--------|----------|--------|---------|
| 1      | 46.949   | 95.282 | 1.652e4 |
| 2      | 50.835   | 4.718  | 818.266 |

Table 2, entry 18

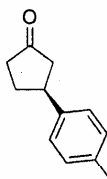

**HPLC Conditions:** Column: Chiralcel OB-H, Daicel Chemical Industries, Ltd.,  
 Eluent: Hexanes/IPA ( 90/10 ); Flow rate: 0.7 mL/min; Detection: UV 219 nm

**Racemic**

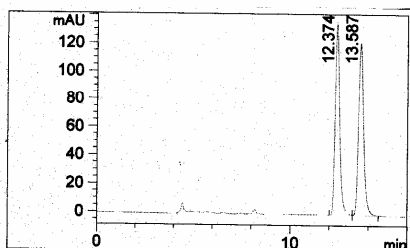

Signal 1: VWD1 A, Wavelength=21

| Peak # | RT [min] | Area % | Area    |
|--------|----------|--------|---------|
| 1      | 12.374   | 49.730 | 2.191e3 |
| 2      | 13.587   | 50.270 | 2.215e3 |

**Chiral**

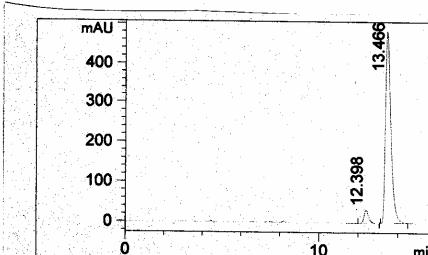

Signal 1: VWD1 A, Wavelength=21

| Peak # | RT [min] | Area % | Area    |
|--------|----------|--------|---------|
| 1      | 12.398   | 5.400  | 521.603 |
| 2      | 13.466   | 94.600 | 9.138e3 |

Table 2, entry 19

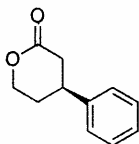

HPLC Conditions: Column: Chiralpak AS-H, Daicel Chemical Industries, Ltd.,  
 Eluent: Hexanes/IPA (60/40); Flow rate: 0.6 mL/min; Detection: UV 214 nm

Racemic

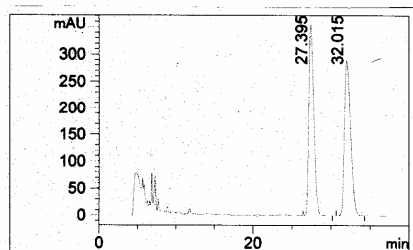

| Peak # | RT [min] | Area % | Area    |
|--------|----------|--------|---------|
| 1      | 27.395   | 49.791 | 1.587e4 |
| 2      | 32.015   | 50.209 | 1.600e4 |

Chiral

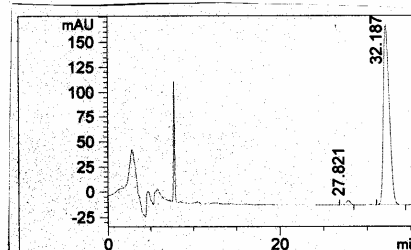

| Peak # | RT [min] | Area % | Area    |
|--------|----------|--------|---------|
| 1      | 27.821   | 1.628  | 140.761 |
| 2      | 32.187   | 98.372 | 8.505e3 |

Table 2, entry 20

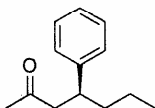

HPLC Conditions: Column: Chiralcel OD-H, Daicel Chemical Industries, Ltd.,  
 Eluent: Hexanes/IPA (99.5/0.5); Flow rate: 0.5 mL/min; Detection: UV 216 nm

Racemic

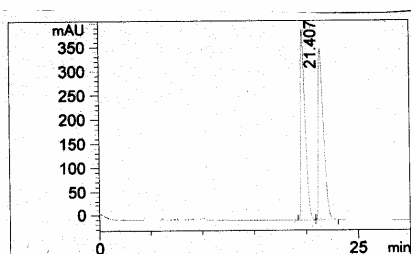

Signal 1: VWD1 A, Wavelength=21

| Peak # | RT [min] | Area % | Area    |
|--------|----------|--------|---------|
| 1      | 19.702   | 49.450 | 1.227e4 |
| 2      | 21.407   | 50.550 | 1.254e4 |

Chiral

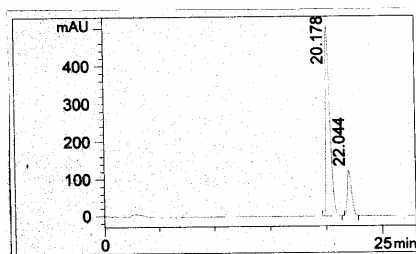

Signal 1: VWD1 A, Wavelength=21

| Peak # | RT [min] | Area % | Area    |
|--------|----------|--------|---------|
| 1      | 20.178   | 80.235 | 1.323e4 |
| 2      | 22.044   | 19.765 | 3.259e3 |

Table 2, entry 21

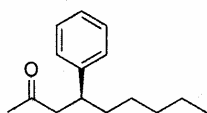

**HPLC Conditions:** Column: Chiralcel OD-H, Daicel Chemical Industries, Ltd.,  
Eluent: Hexanes/IPA ( 99/1 ); Flow rate: 0.5 mL/min; Detection: UV 211 nm

**Racemic**

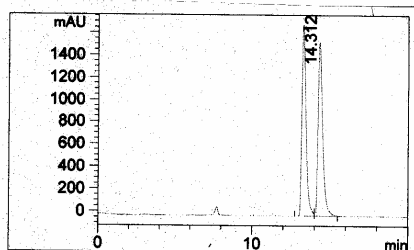

Signal 1: VWD1 A, Wavelength=211

| Peak # | RT [min] | Area % | Area    |
|--------|----------|--------|---------|
| 1      | 13.267   | 49.507 | 3.131e4 |
| 2      | 14.312   | 50.493 | 3.193e4 |

**Chiral**

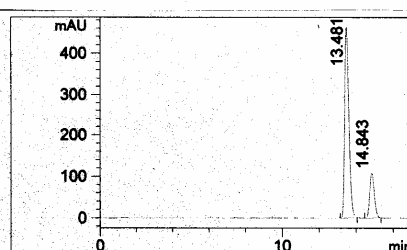

Signal 1: VWD1 A, Wavelength=211

| Peak # | RT [min] | Area % | Area    |
|--------|----------|--------|---------|
| 1      | 13.481   | 79.998 | 7.320e3 |
| 2      | 14.843   | 20.002 | 1.830e3 |

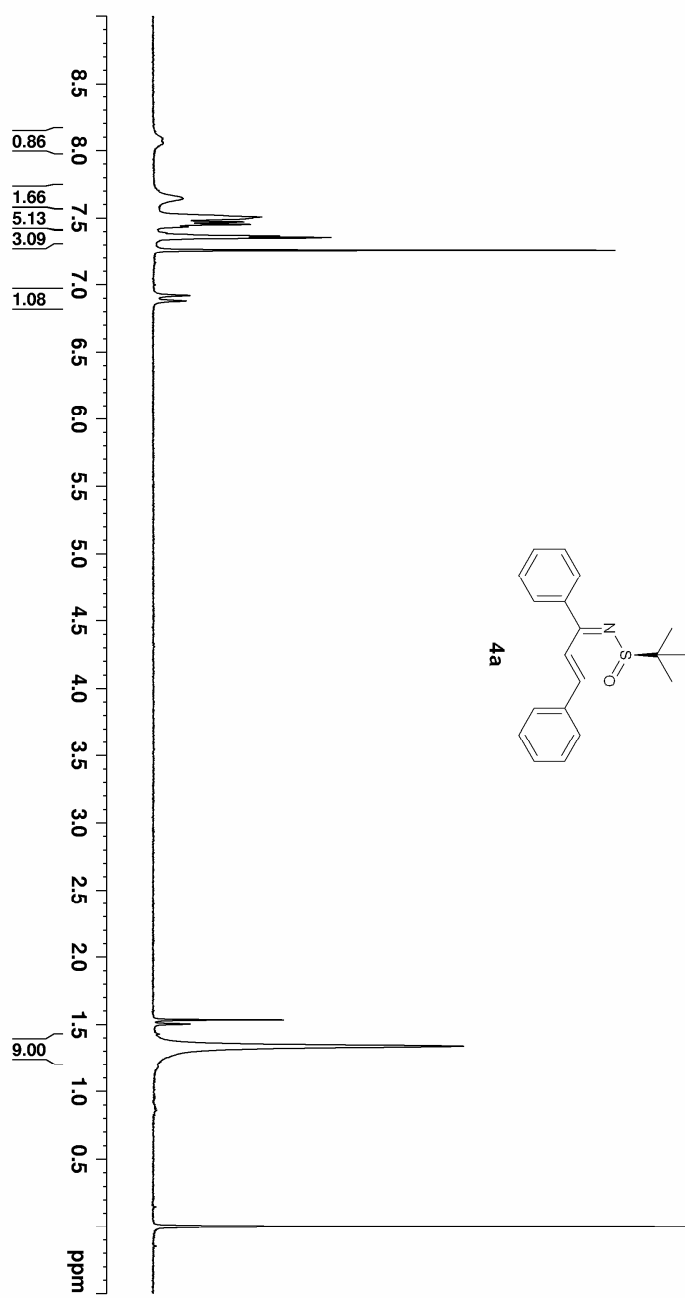

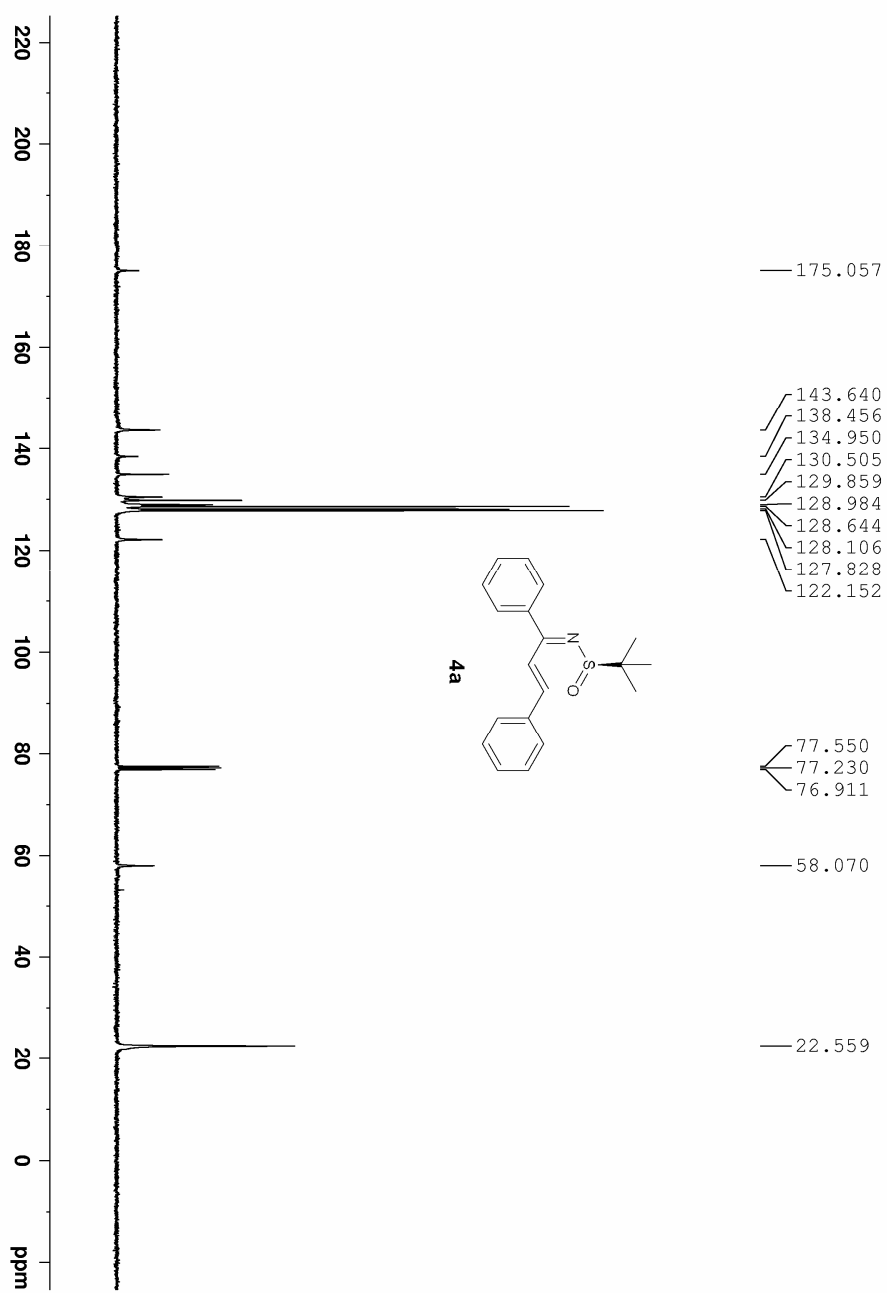

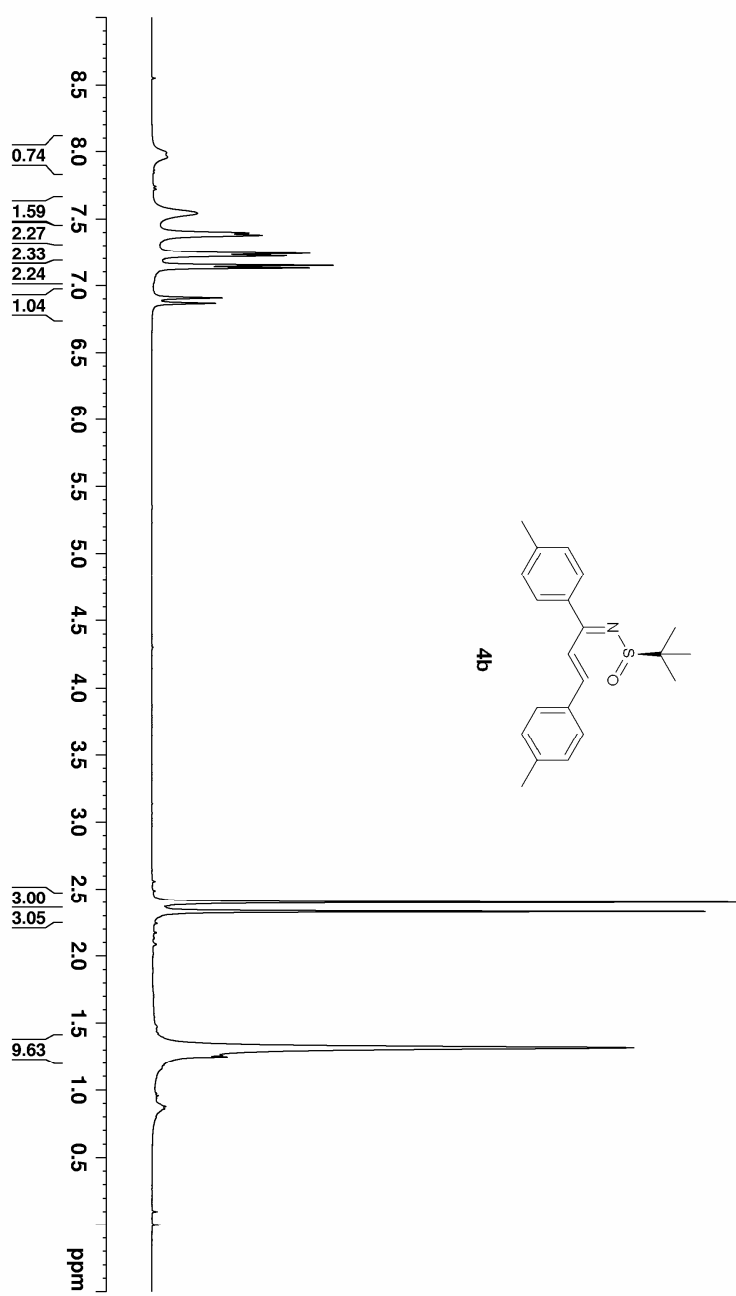

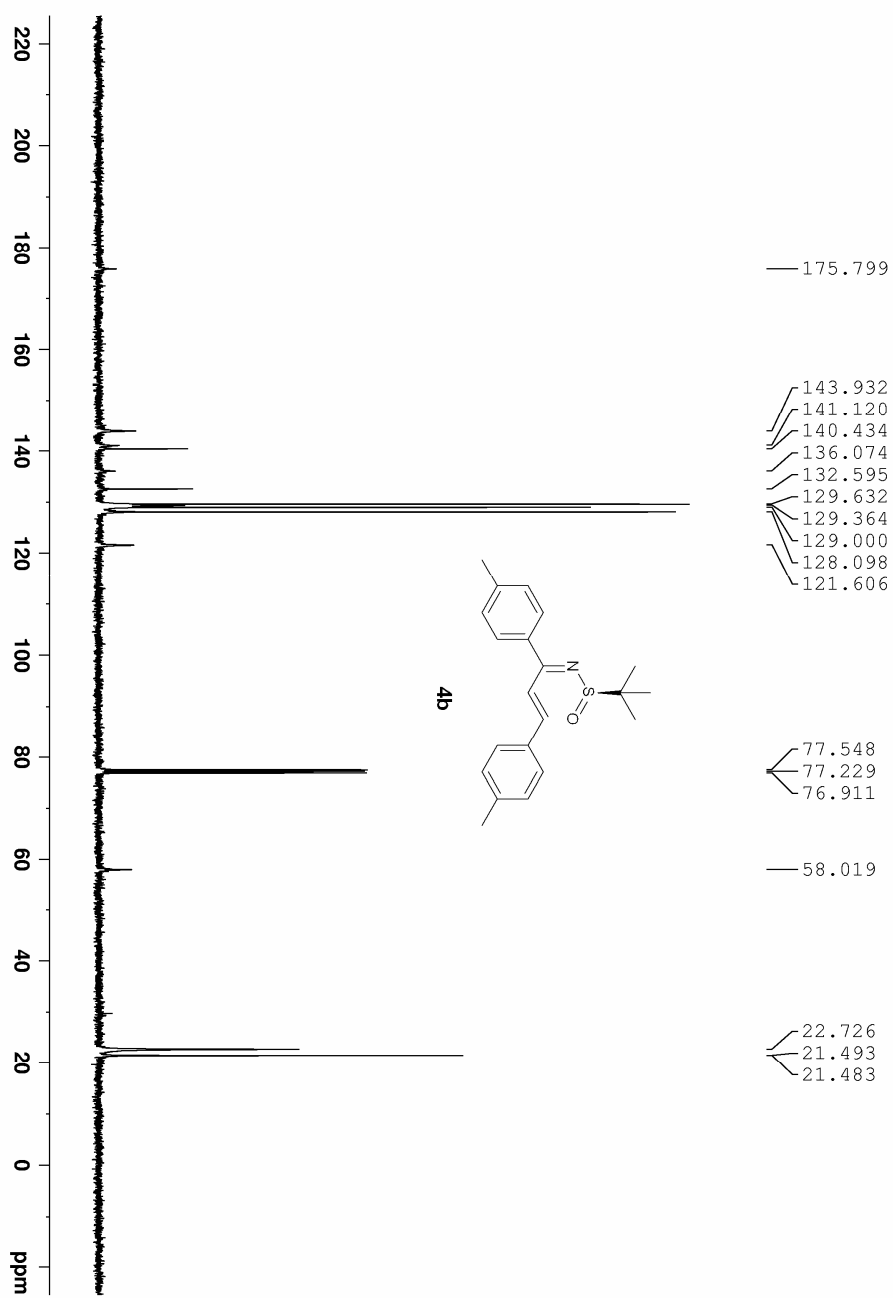

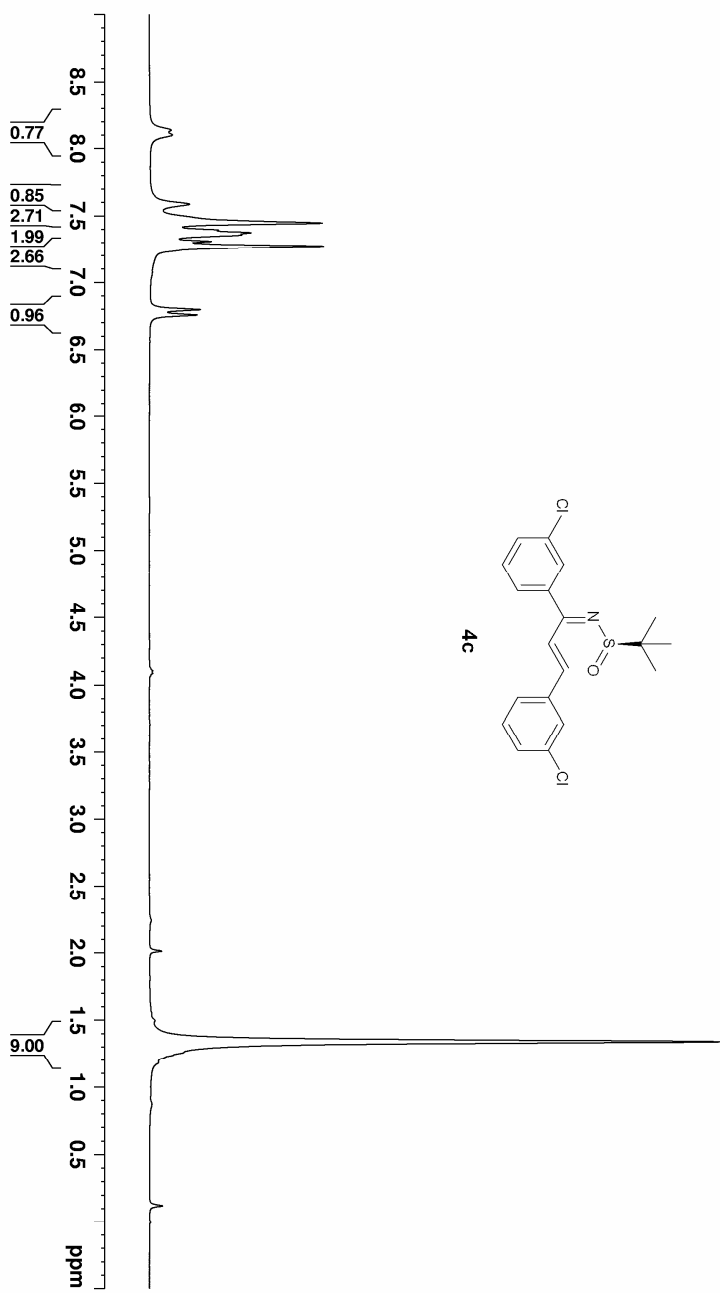



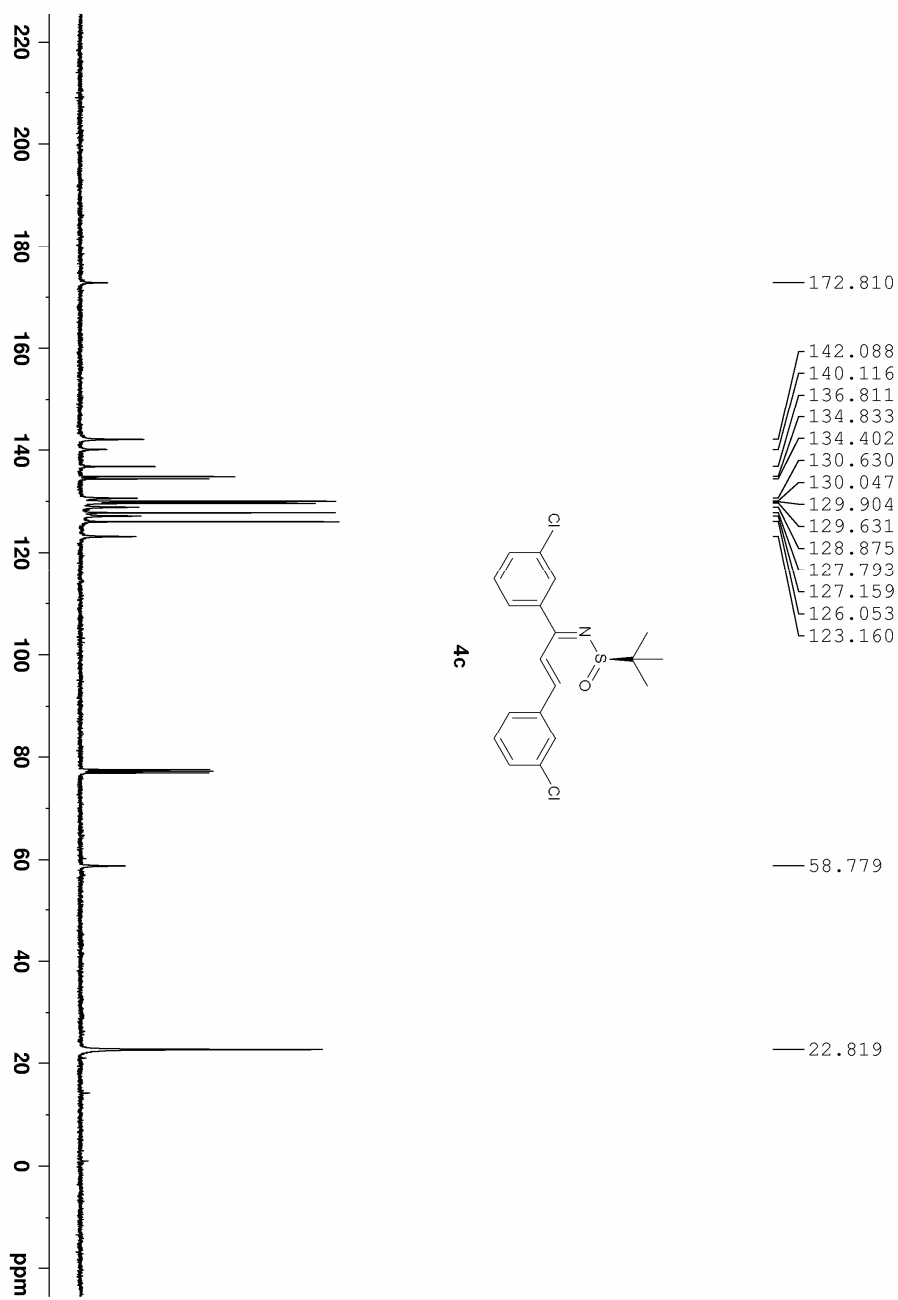

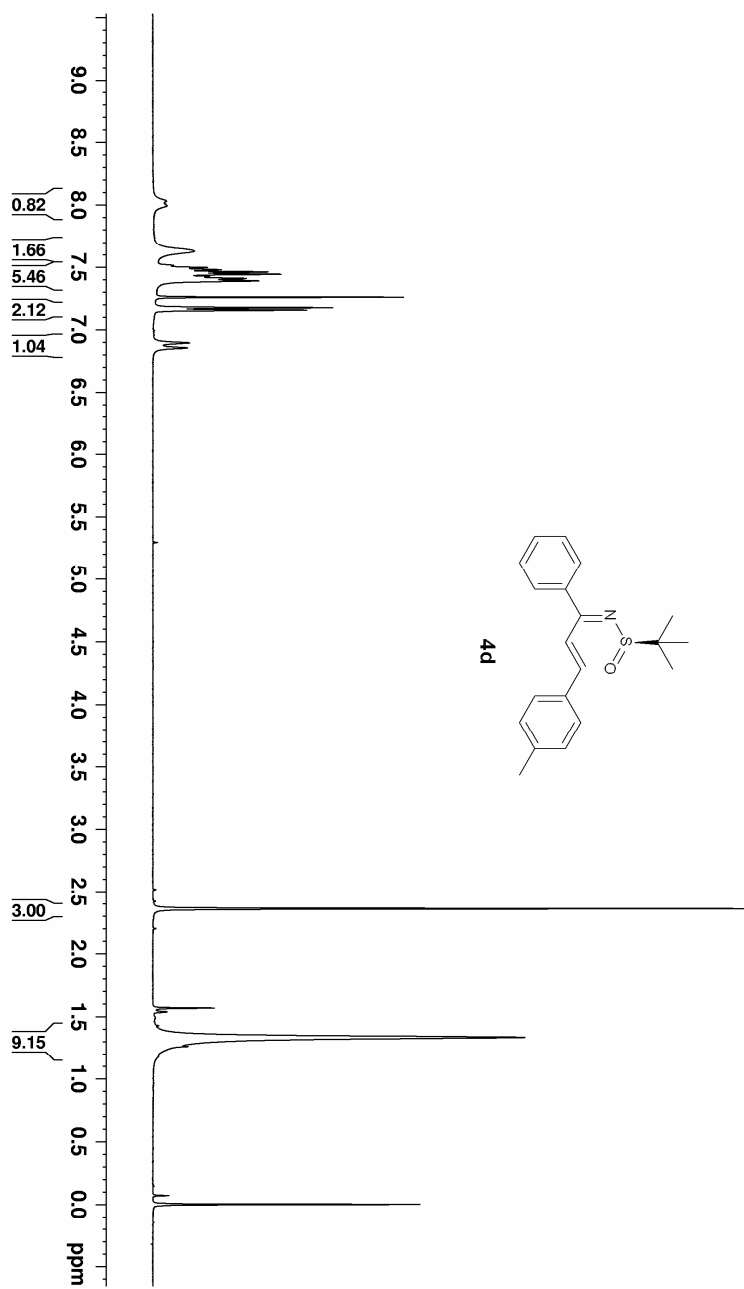

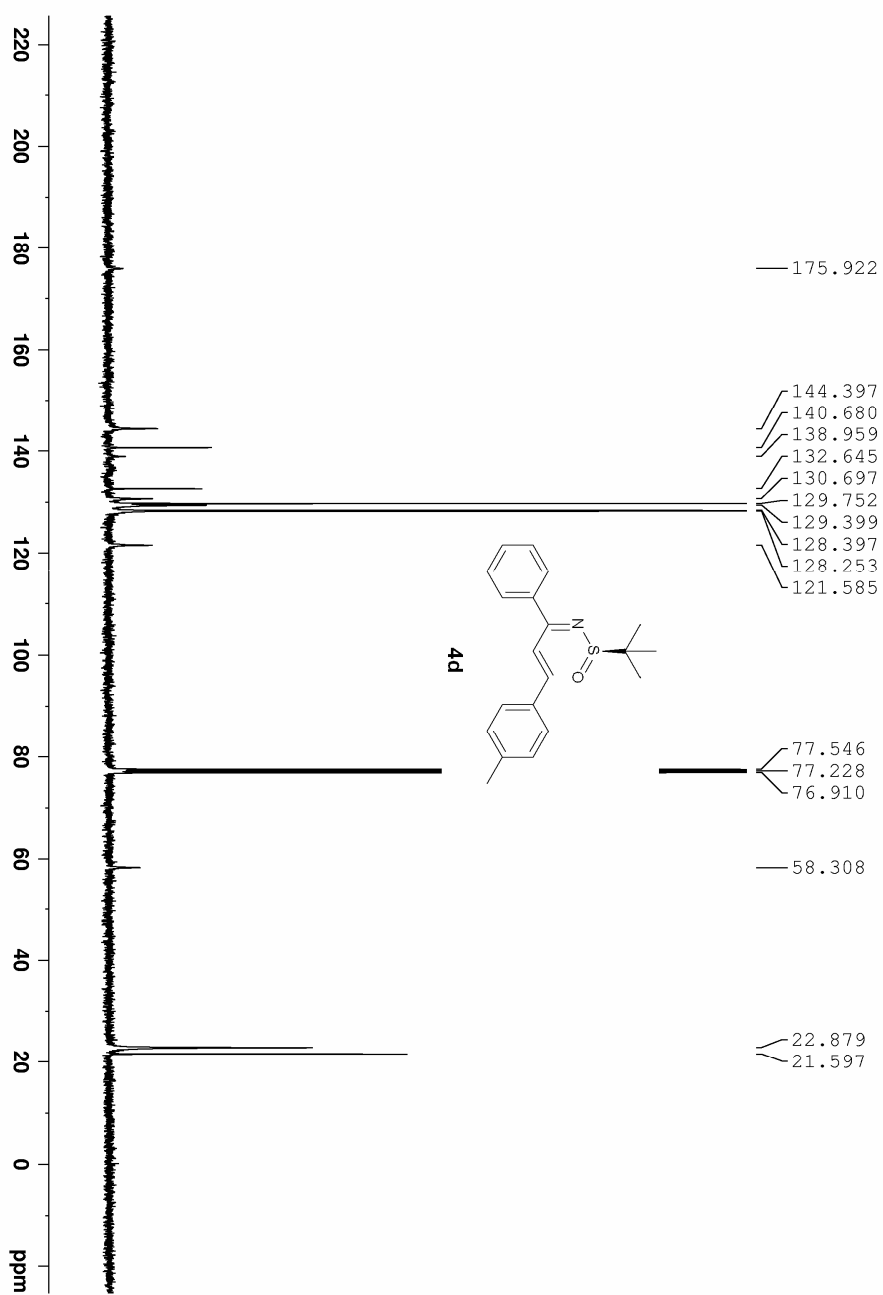

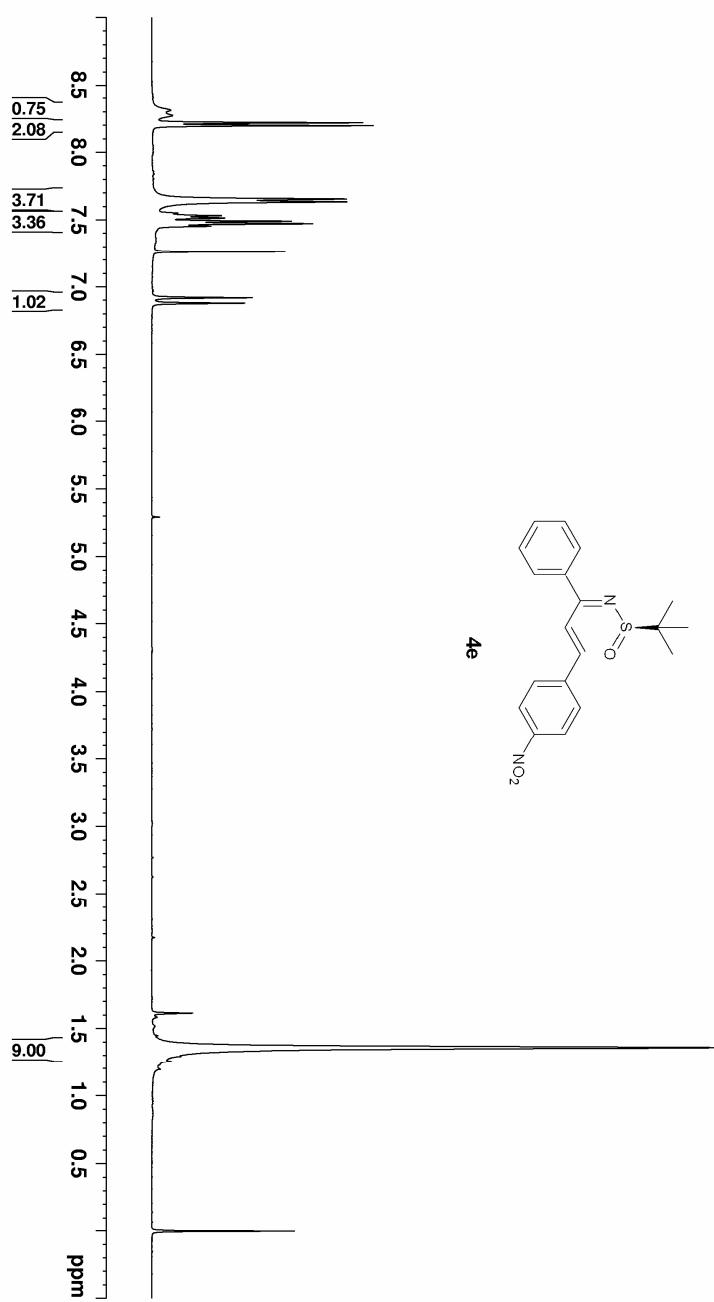

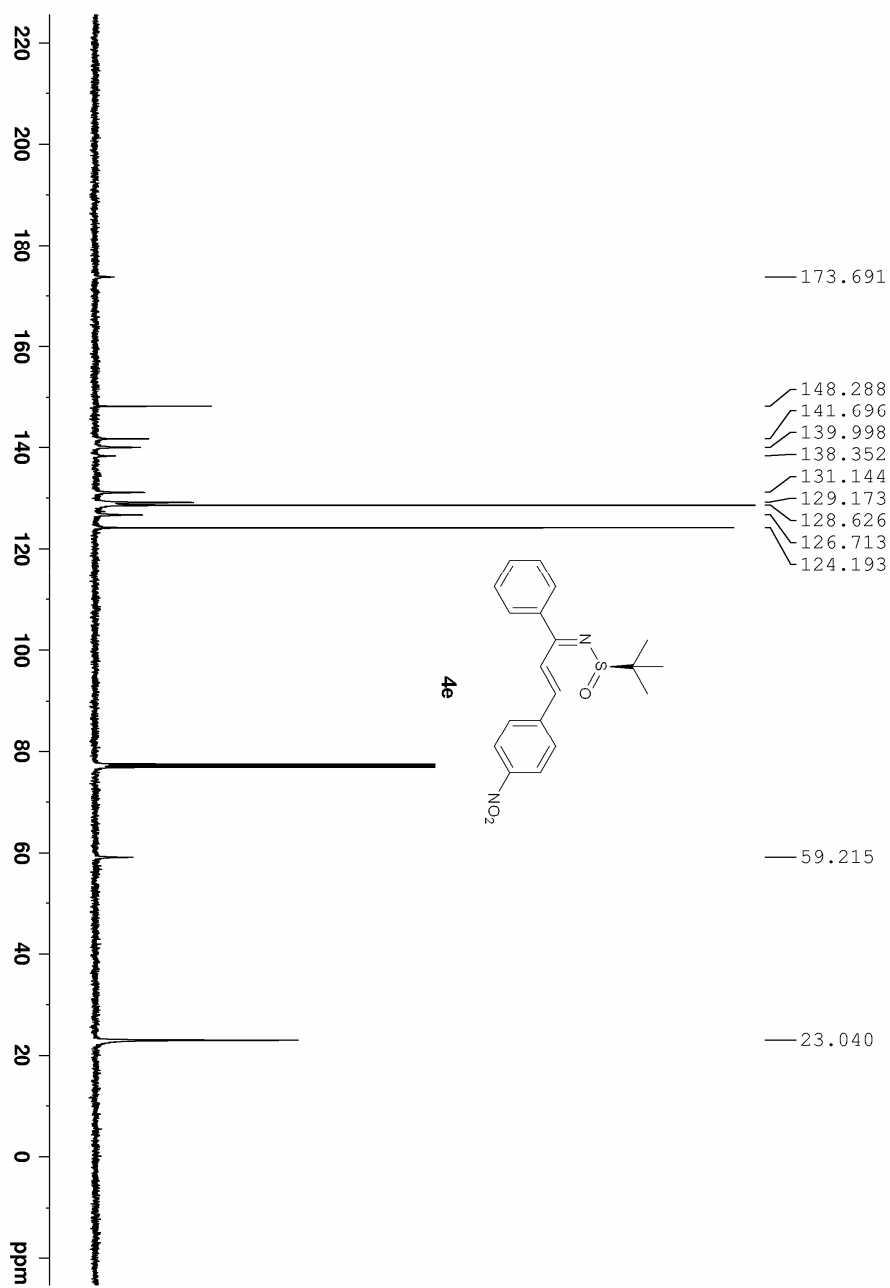

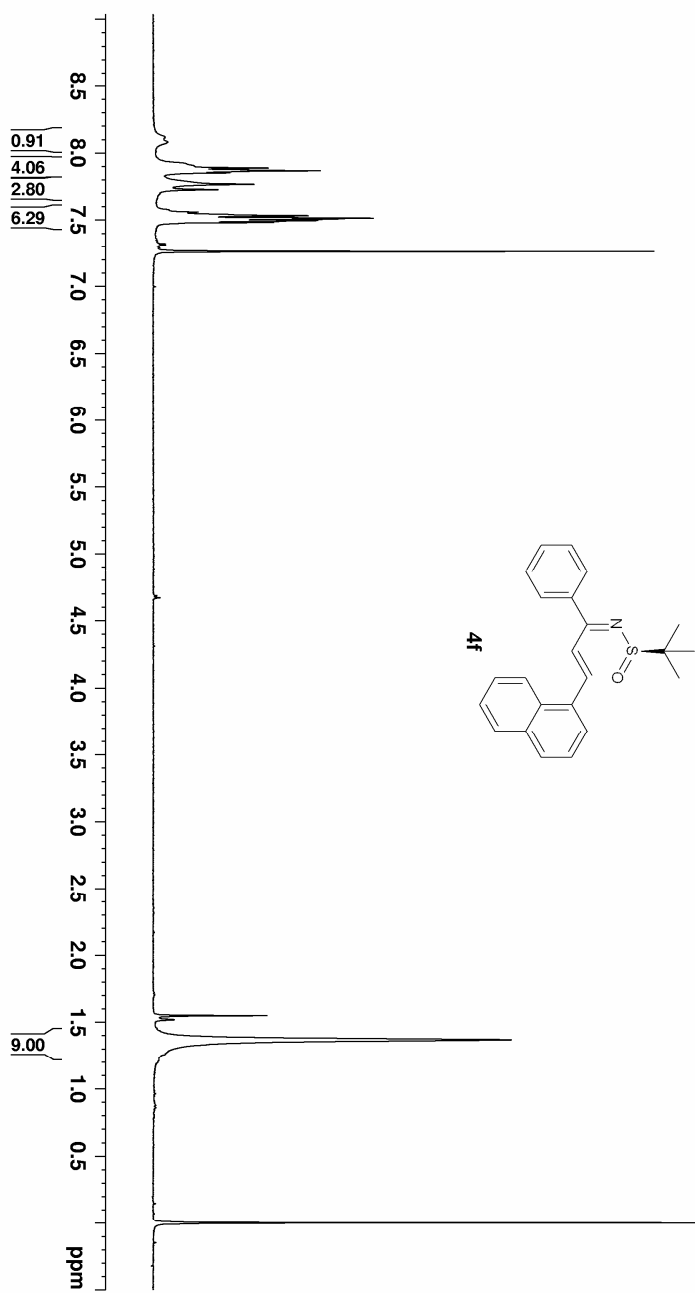

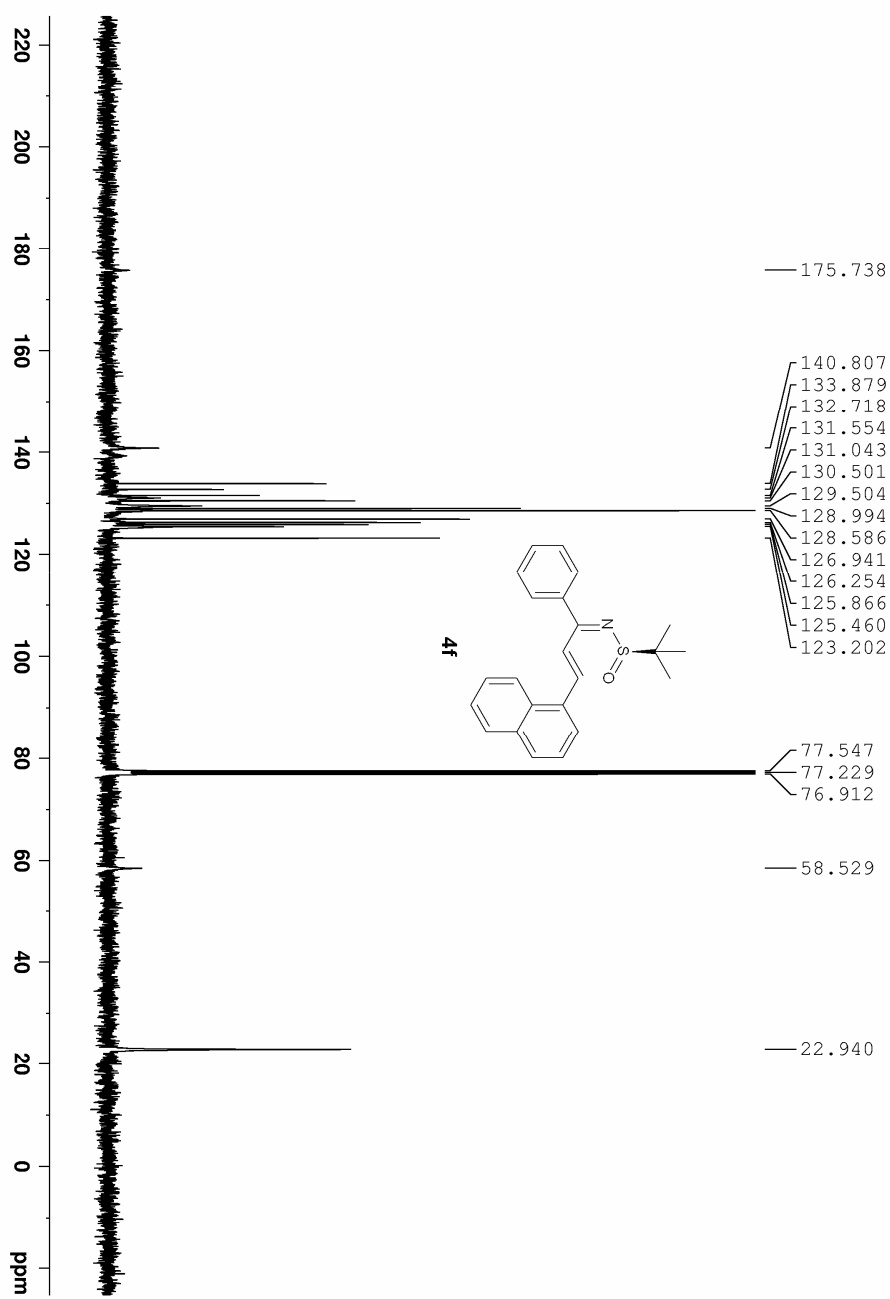

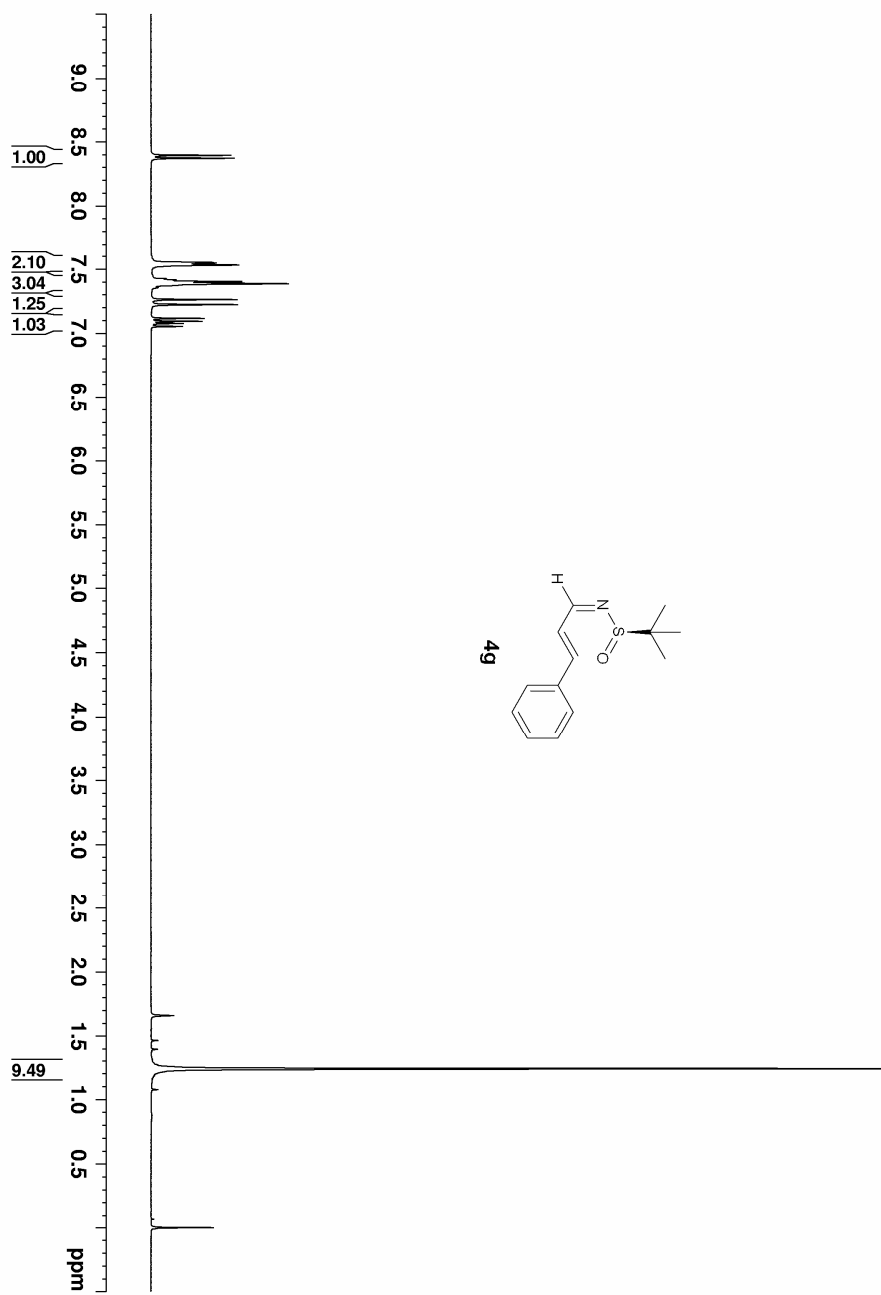



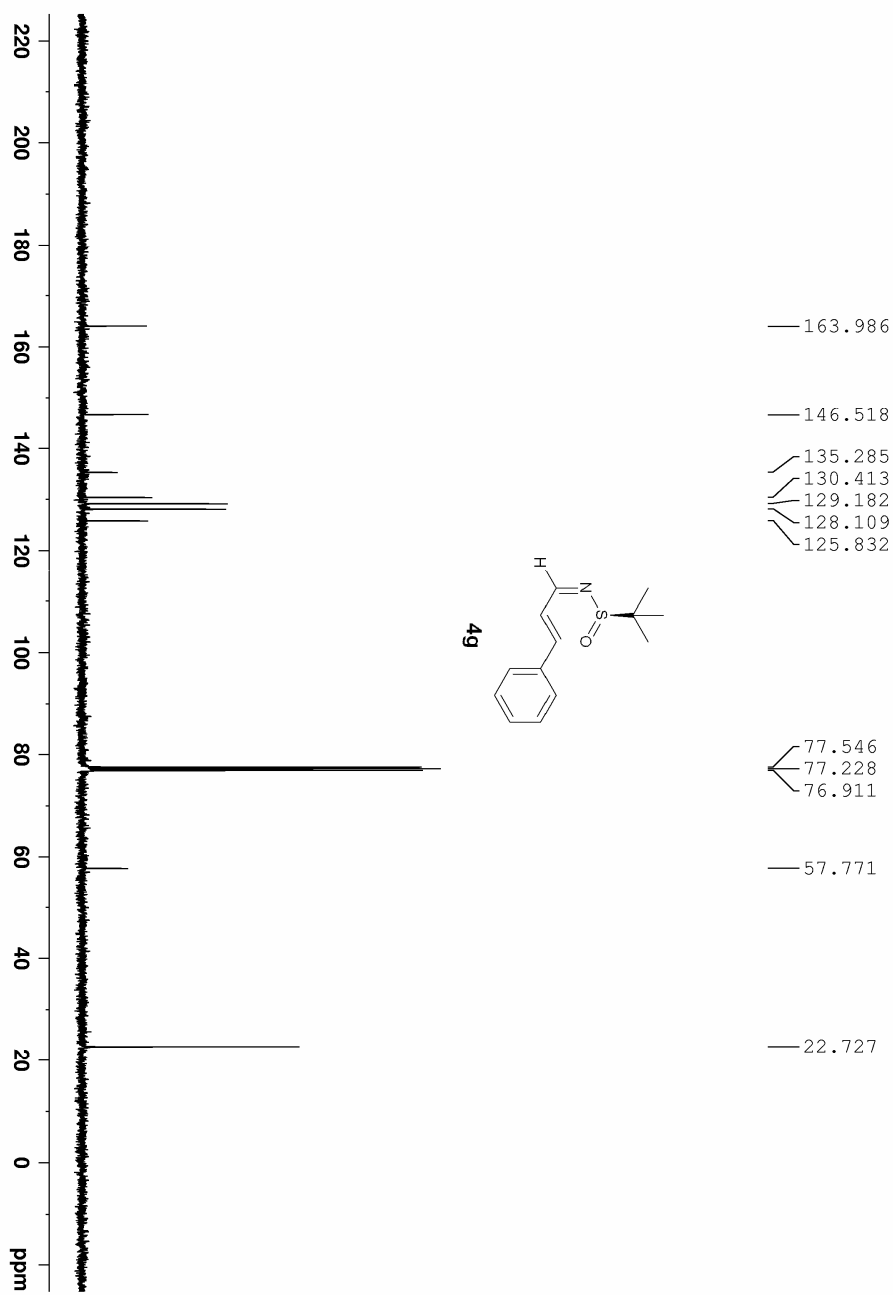

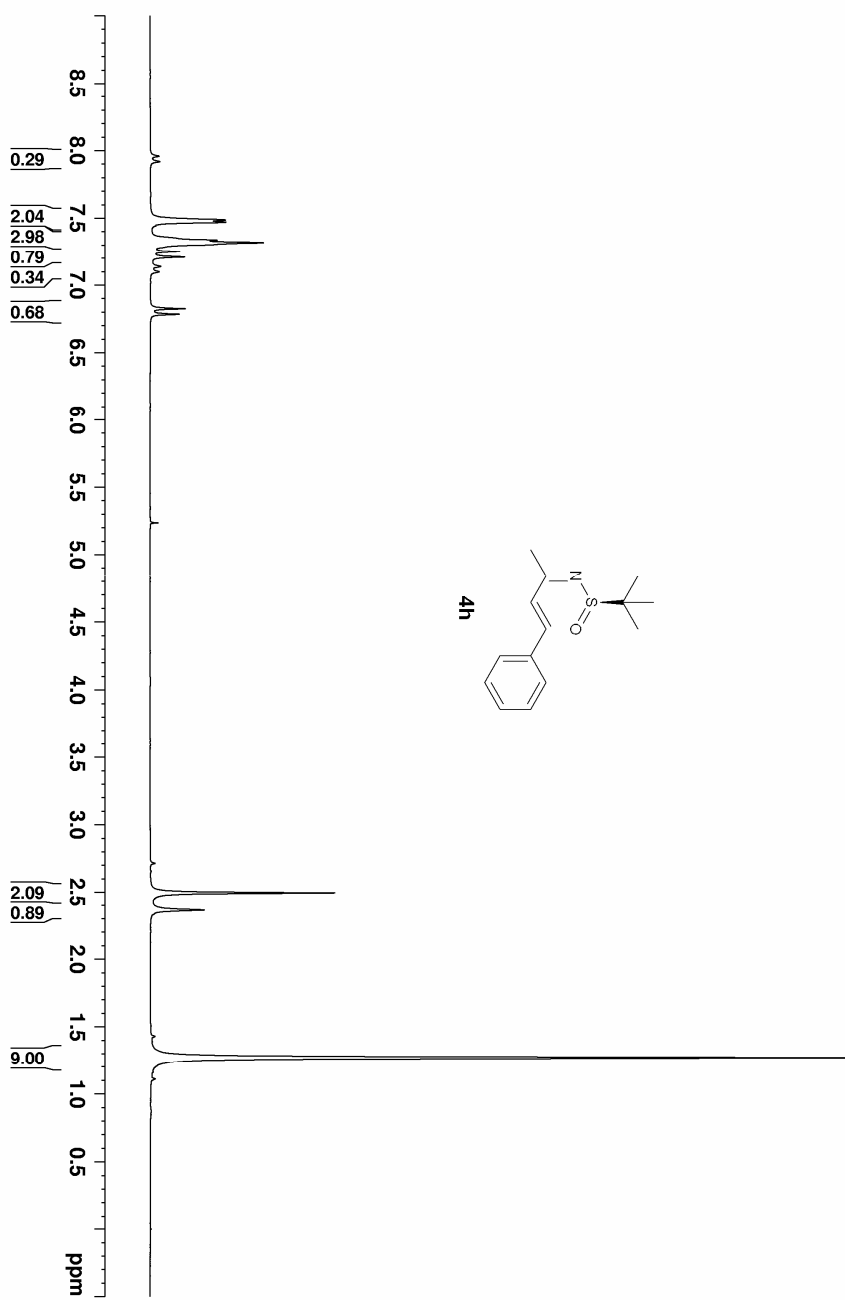

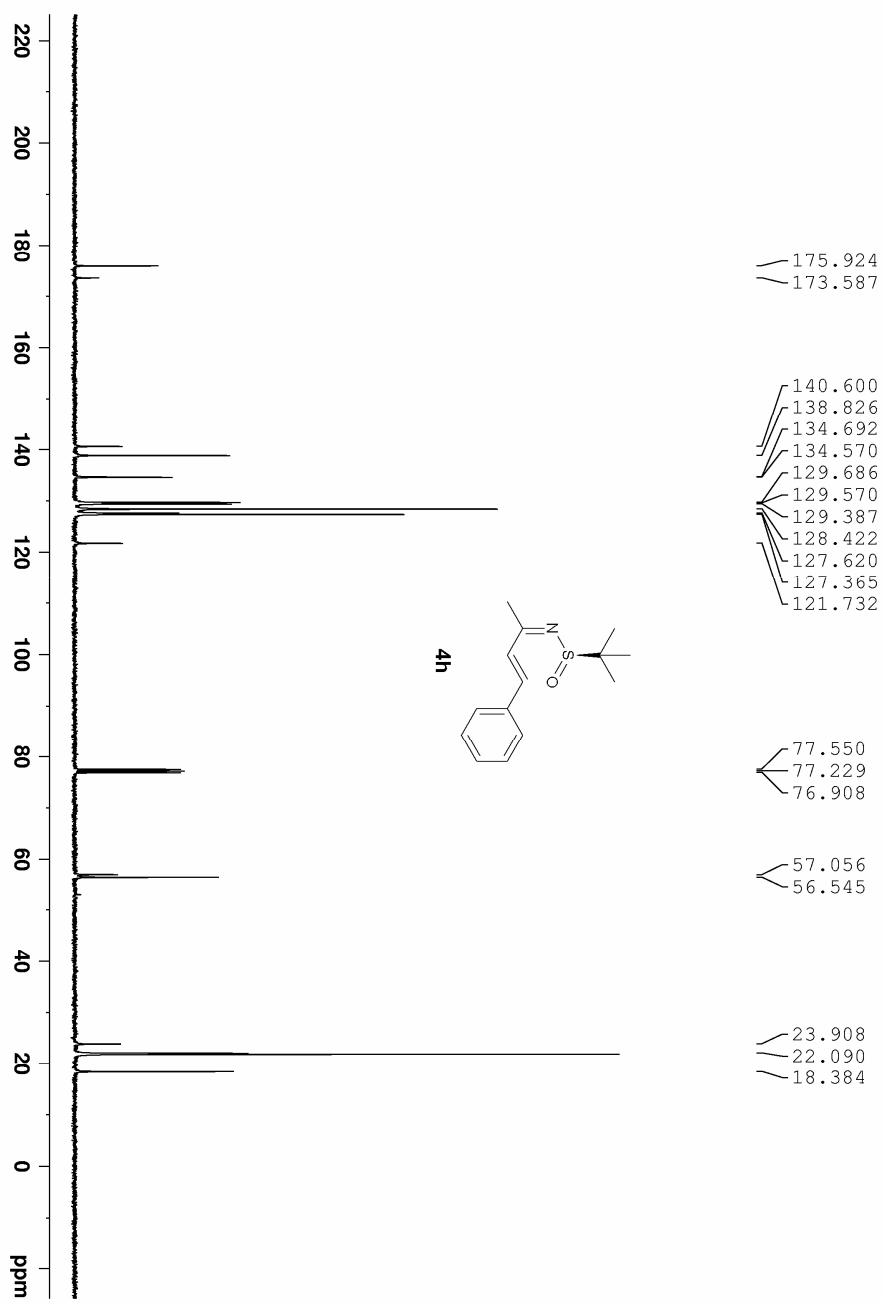

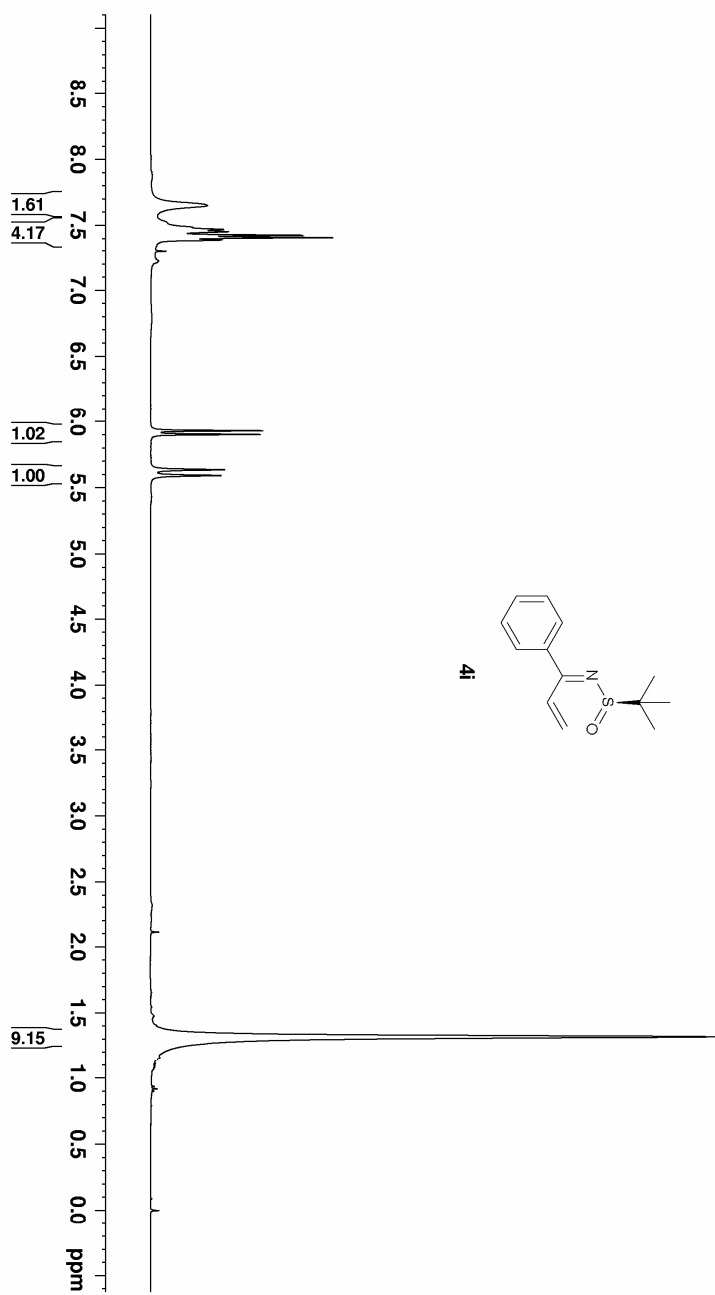

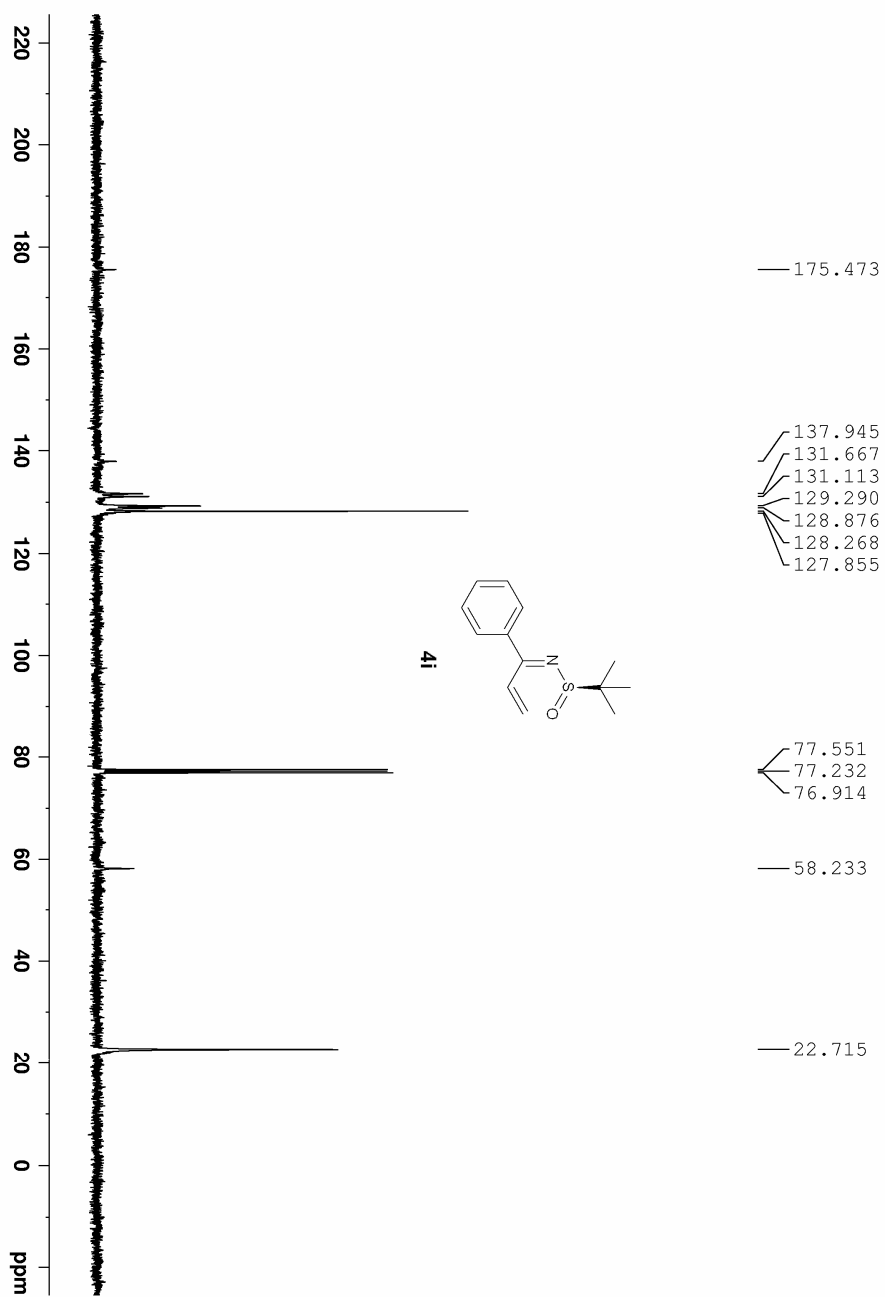

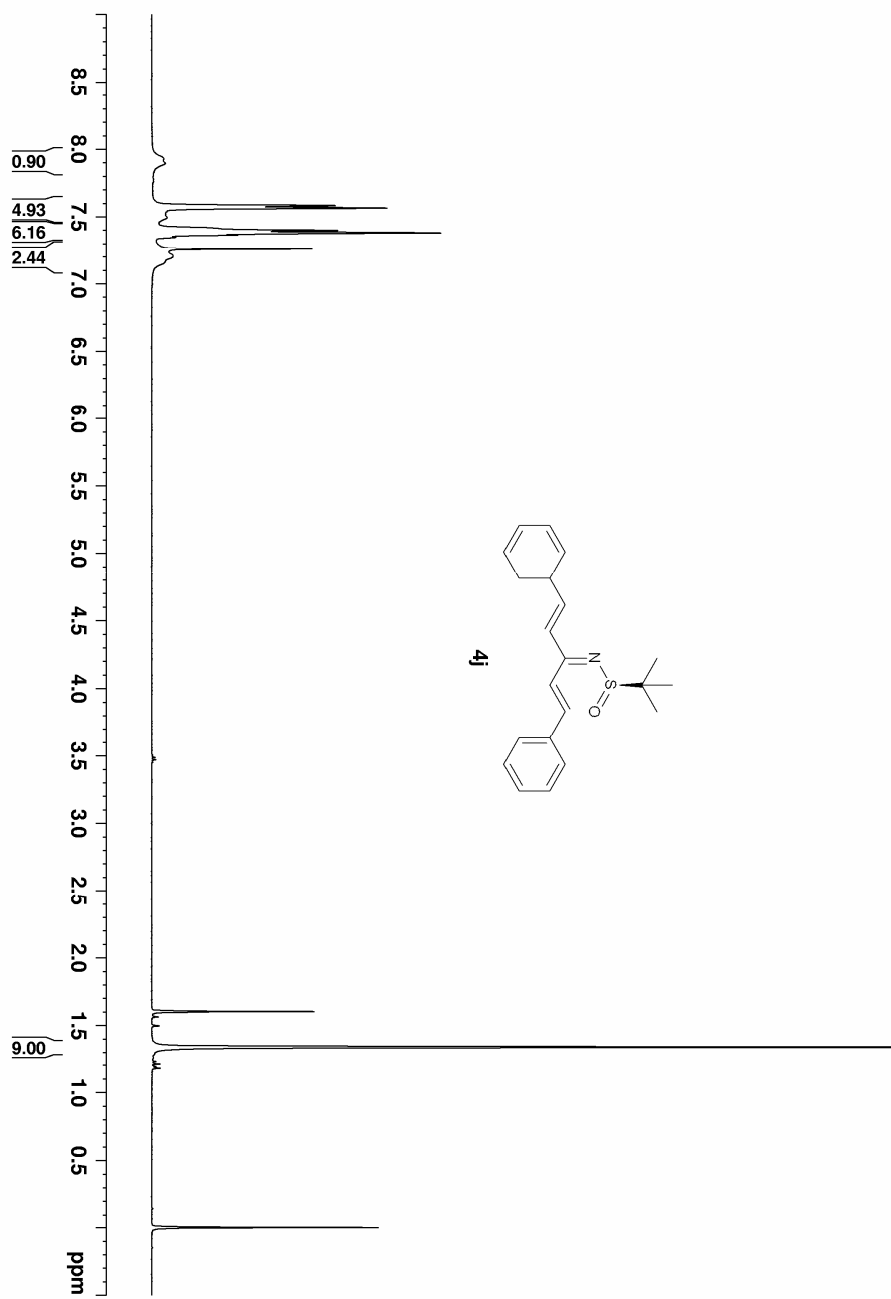

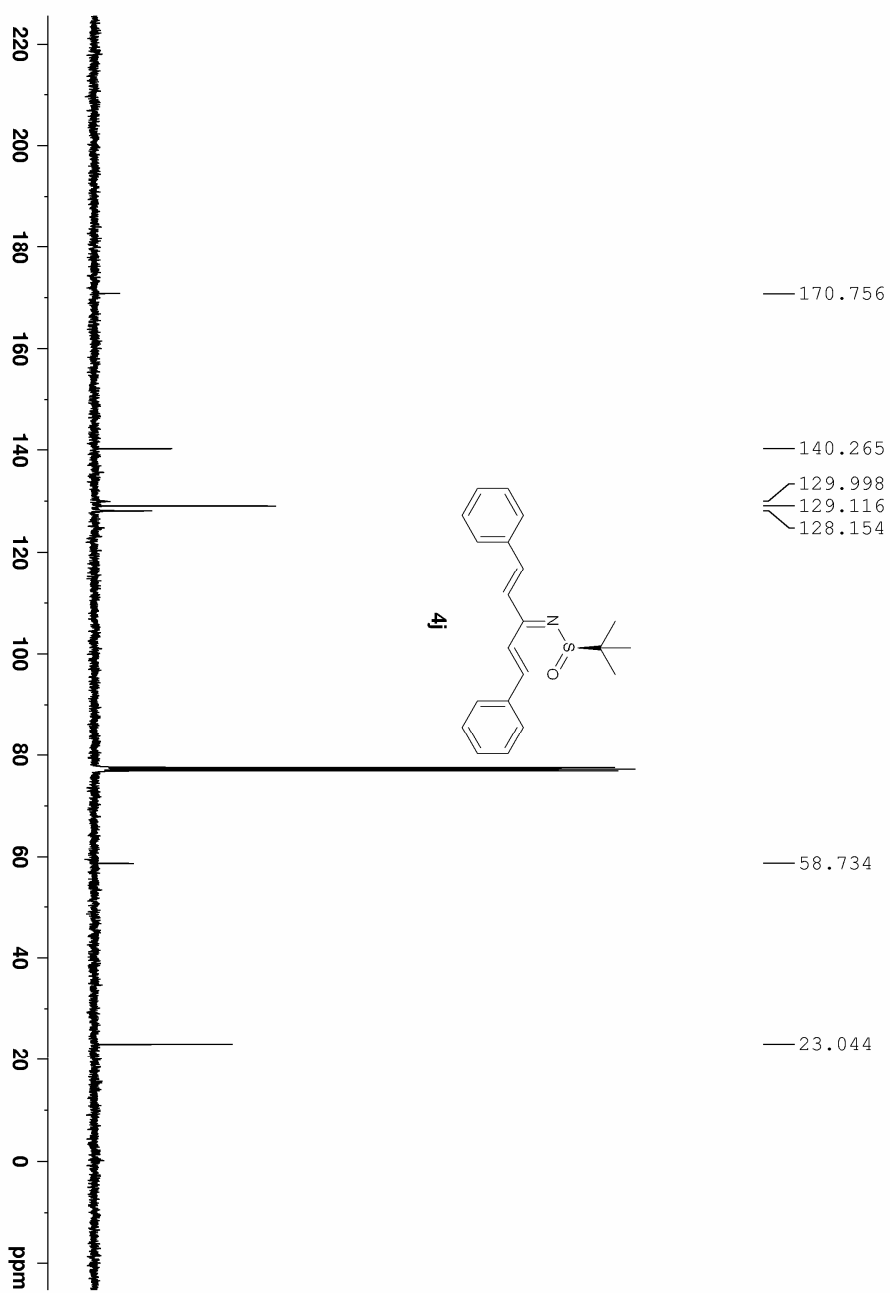

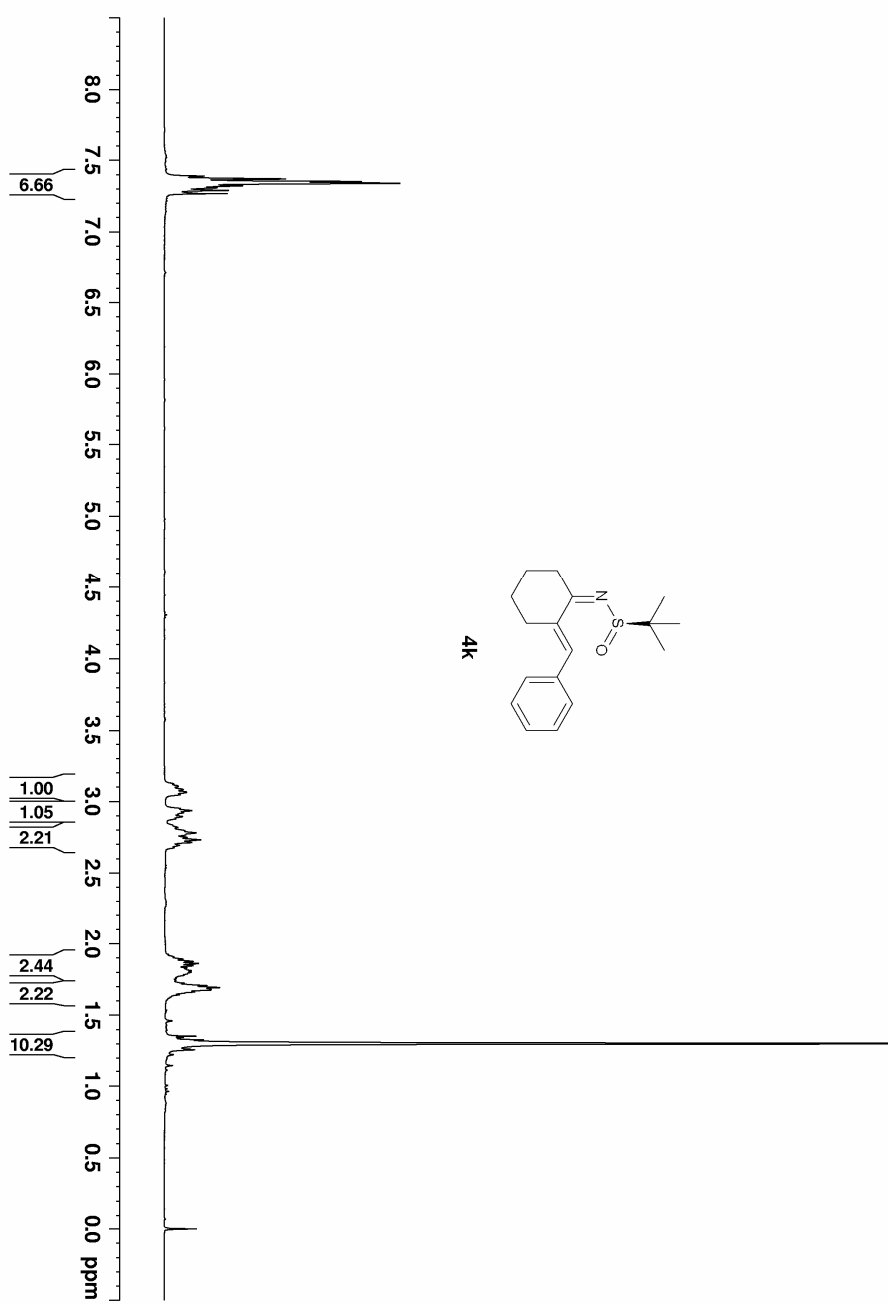



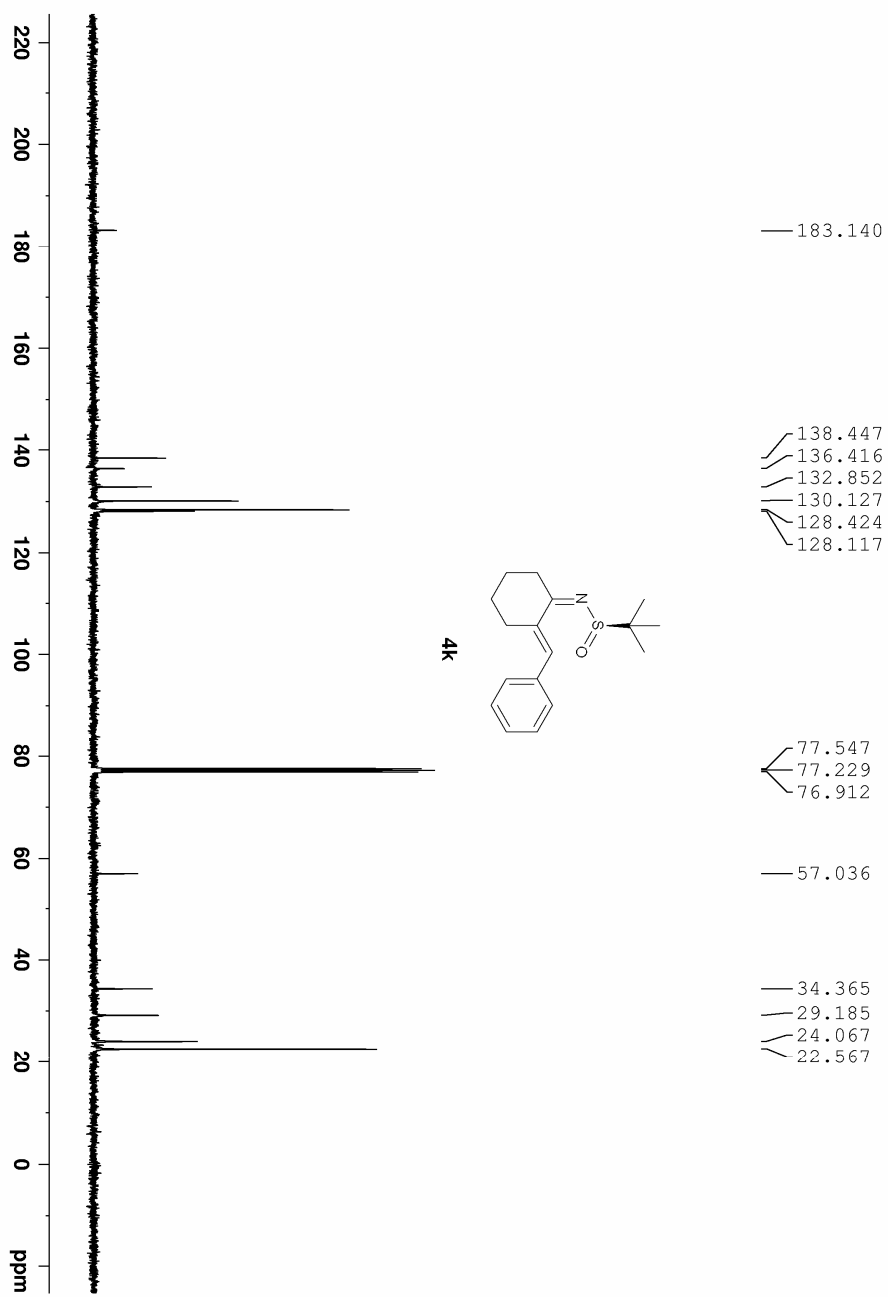

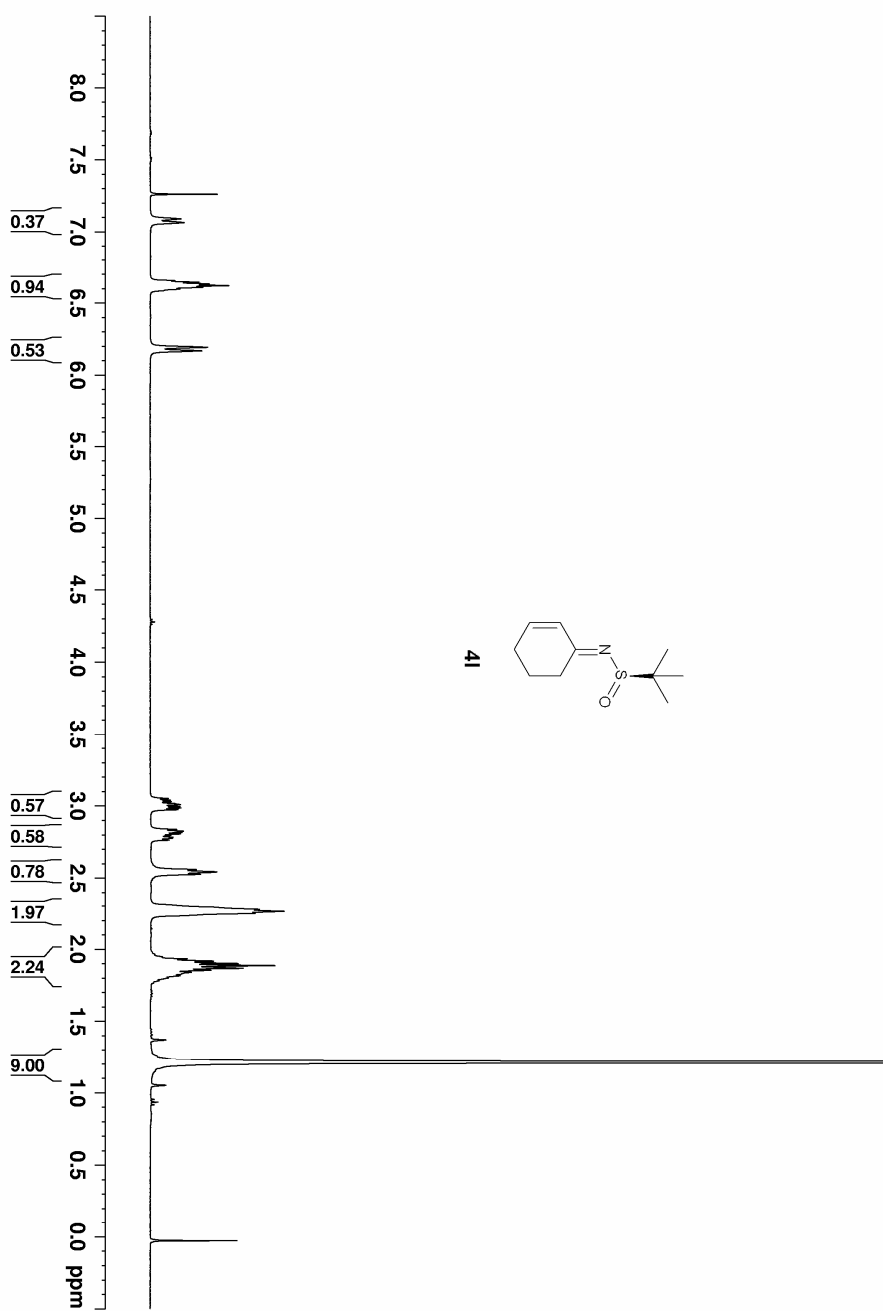

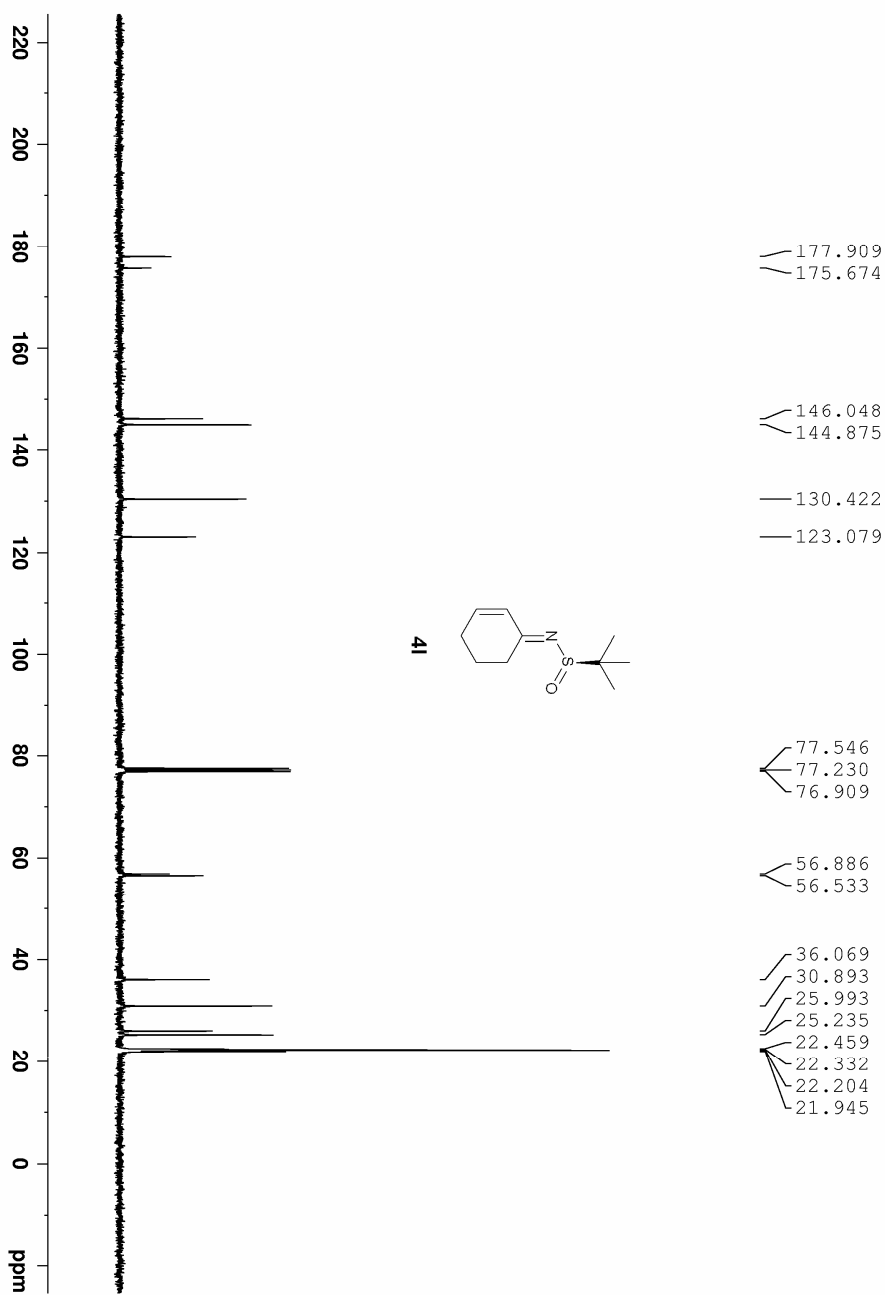

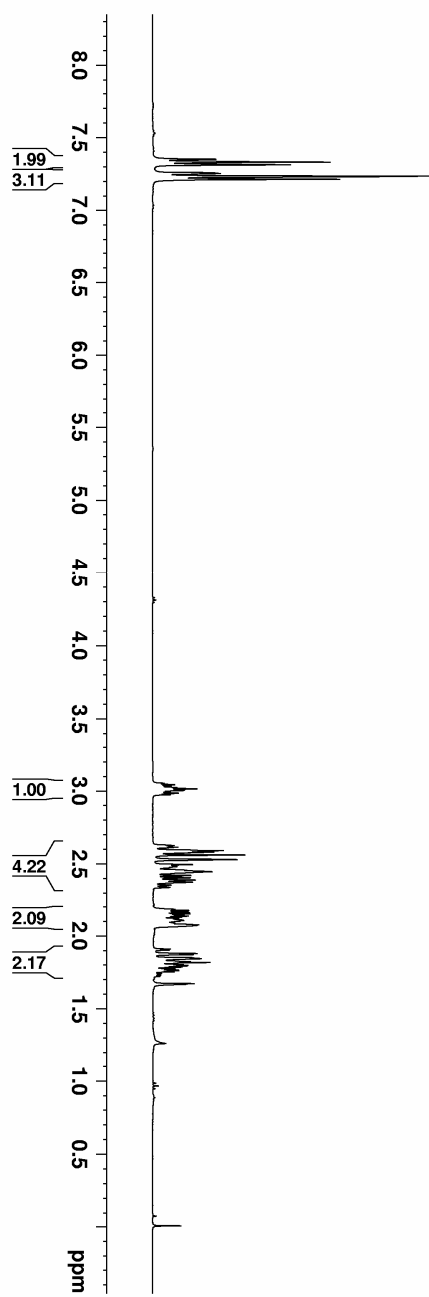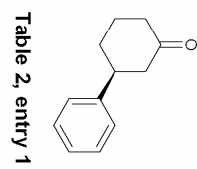

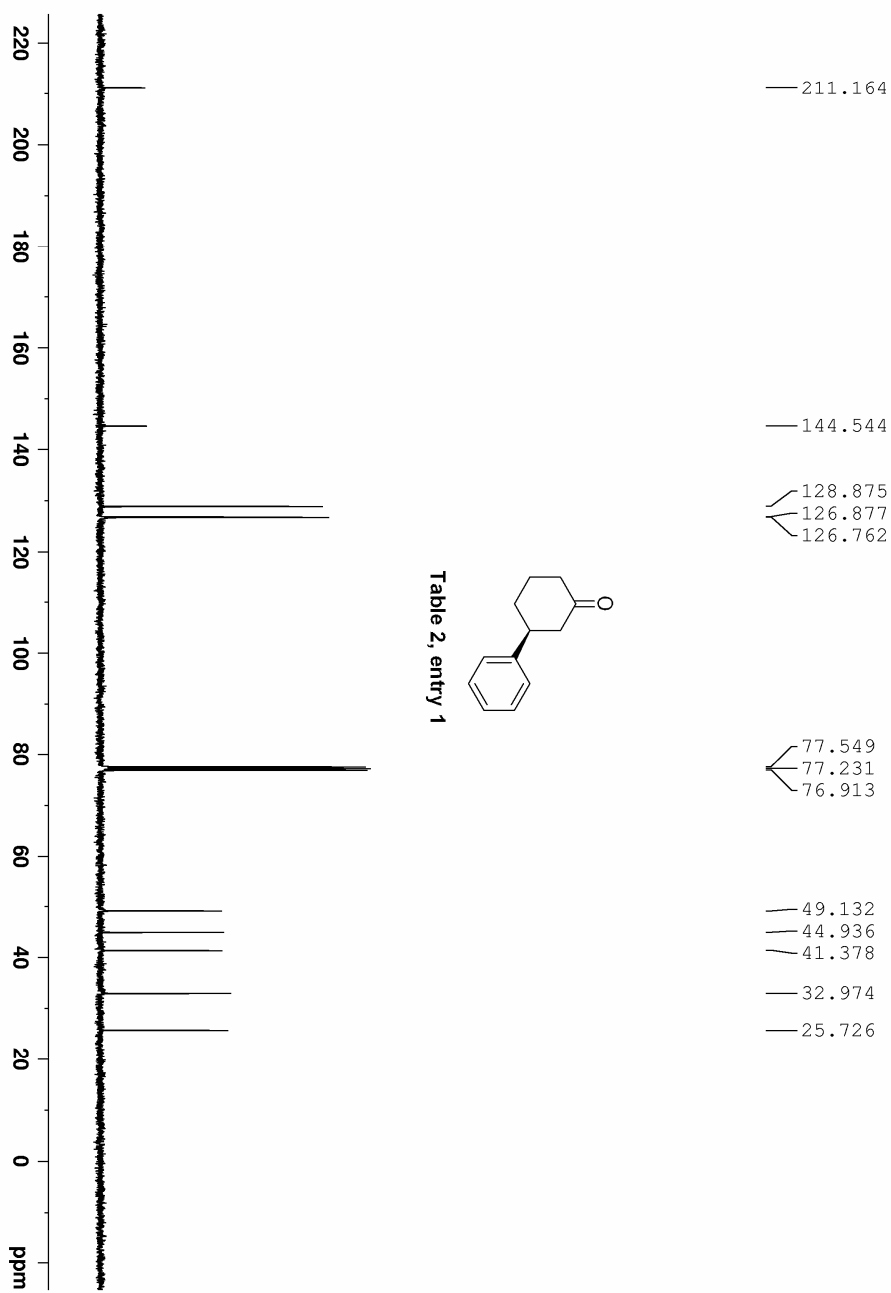

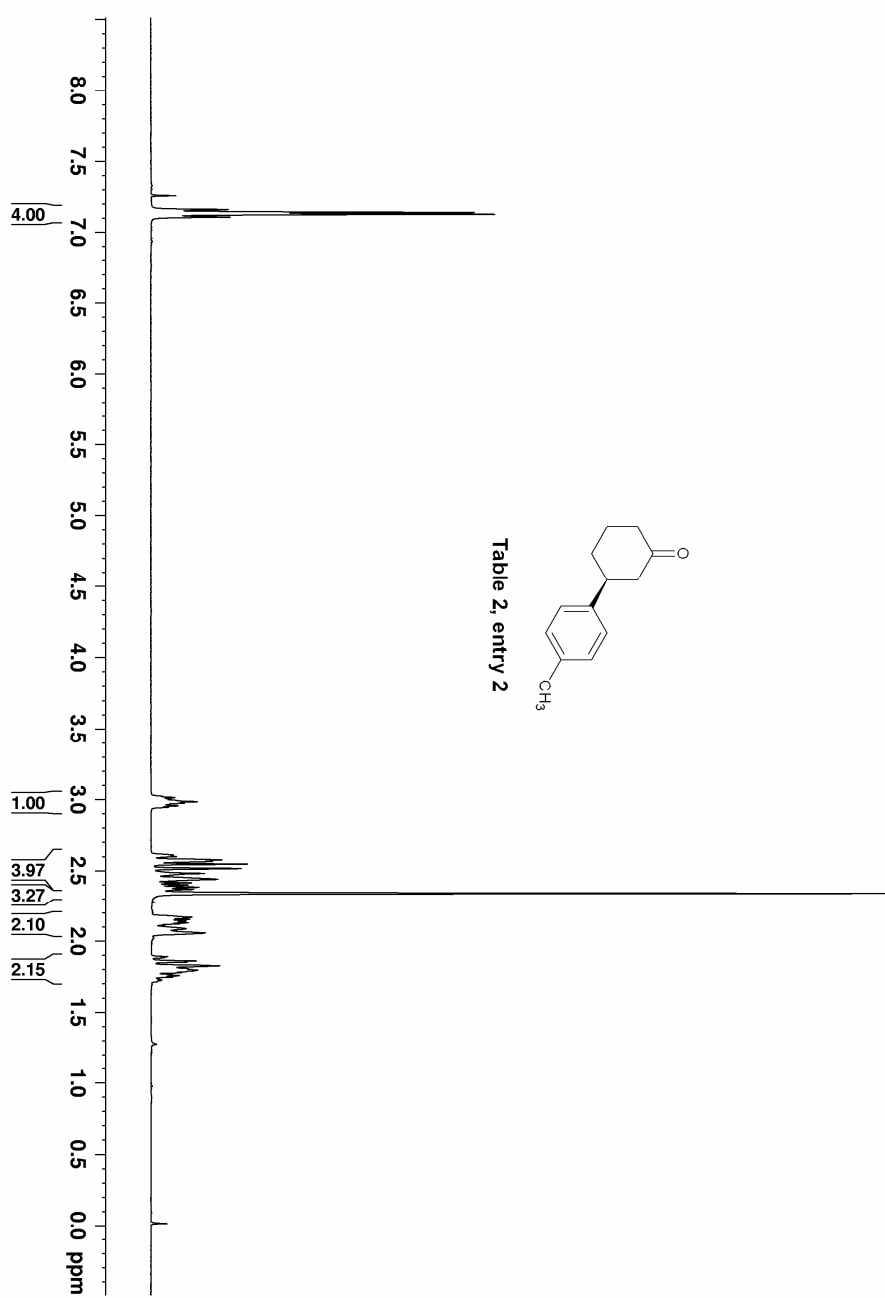

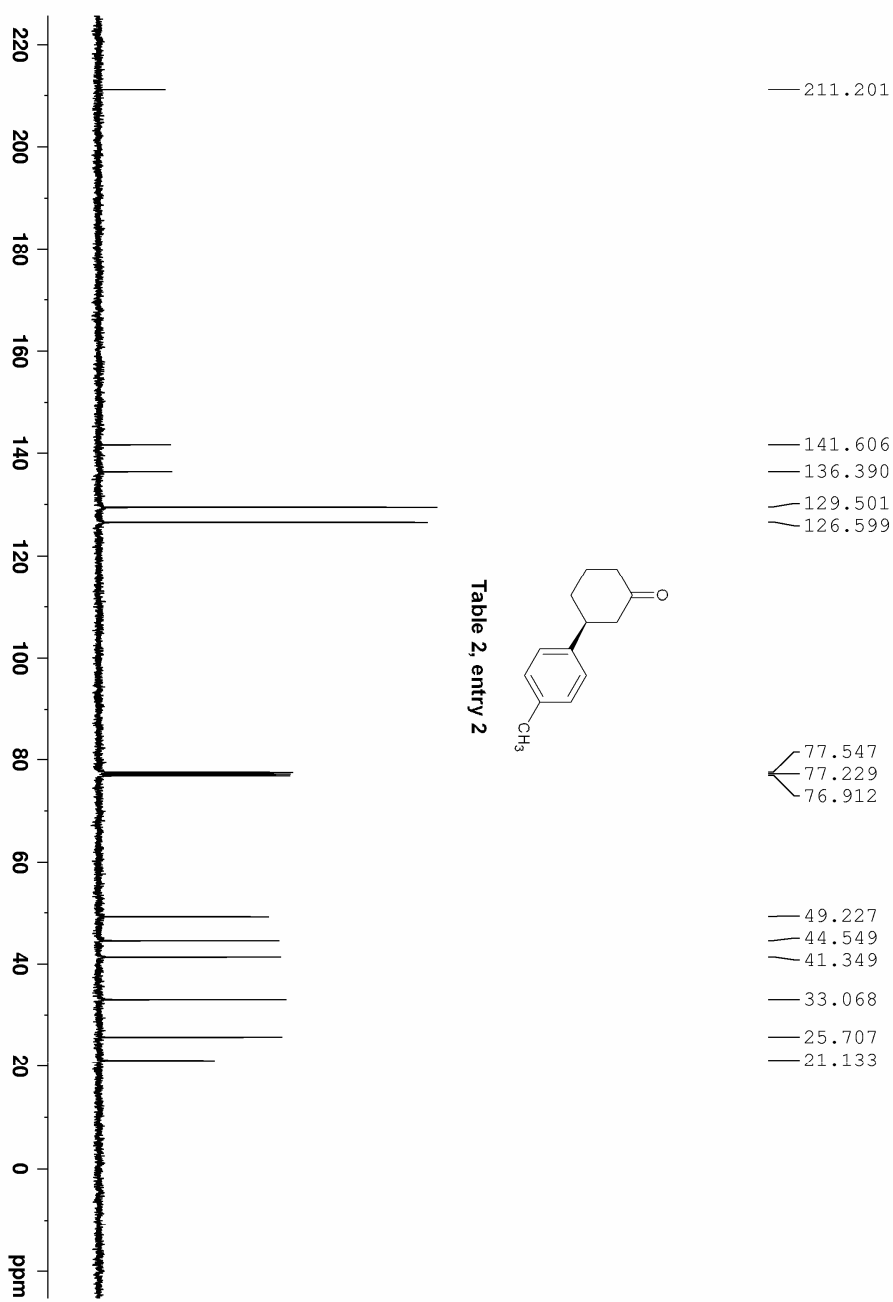

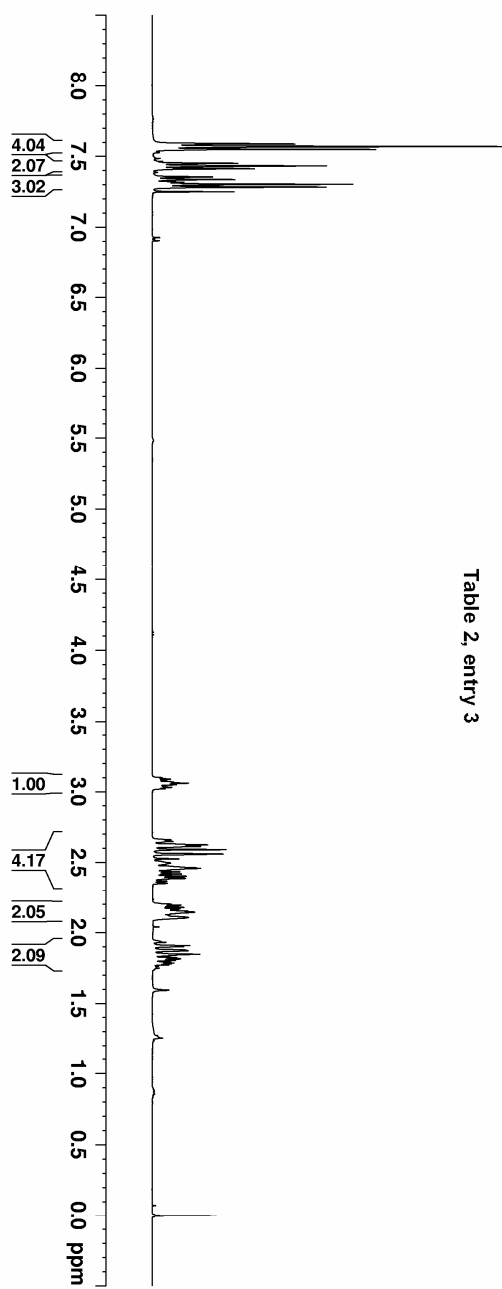

Table 2, entry 3

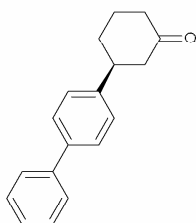



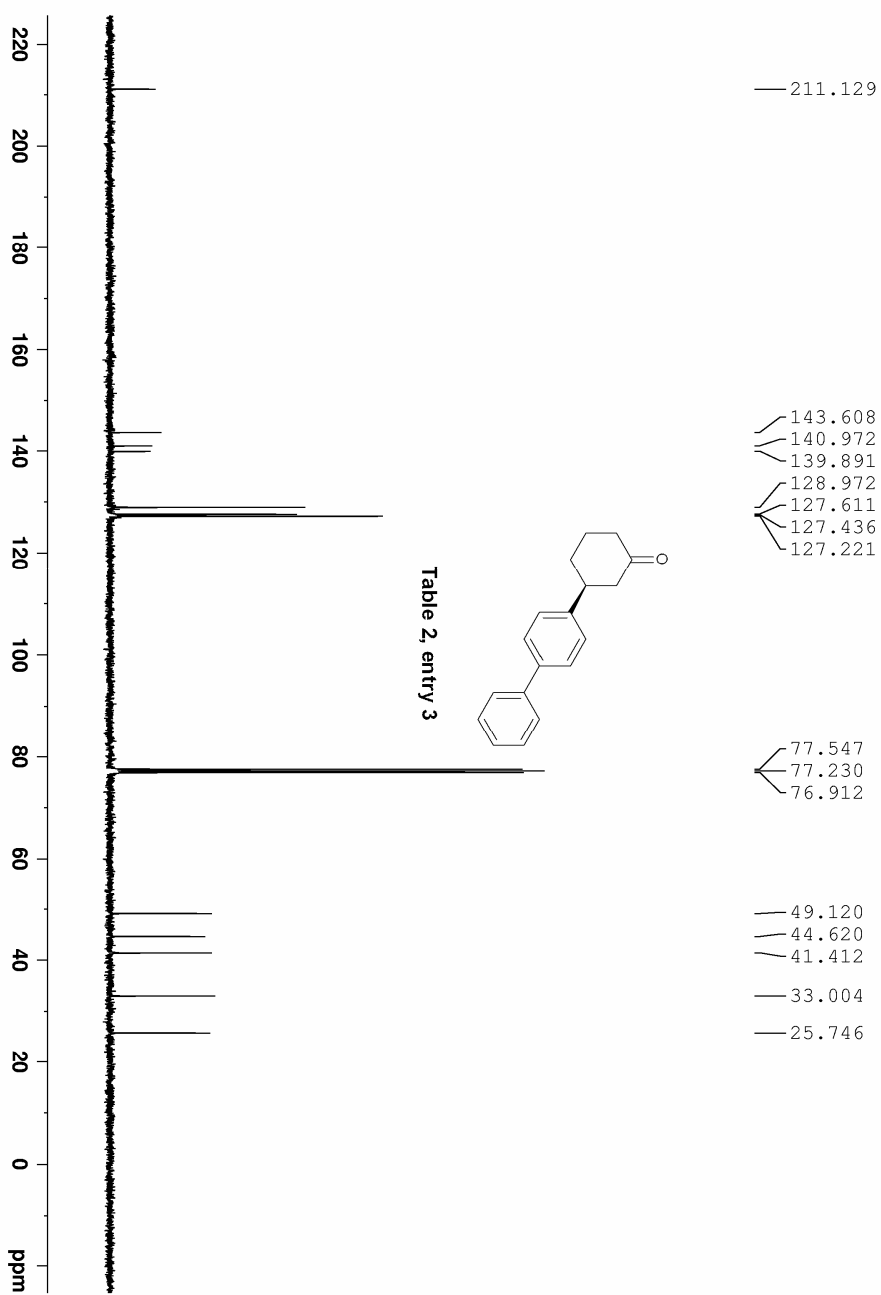

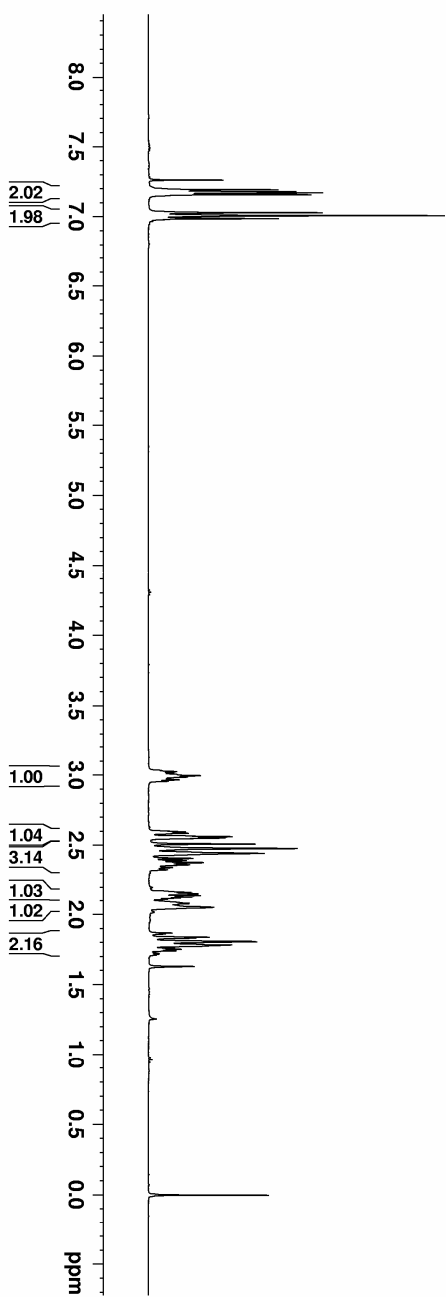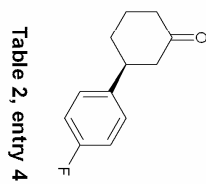

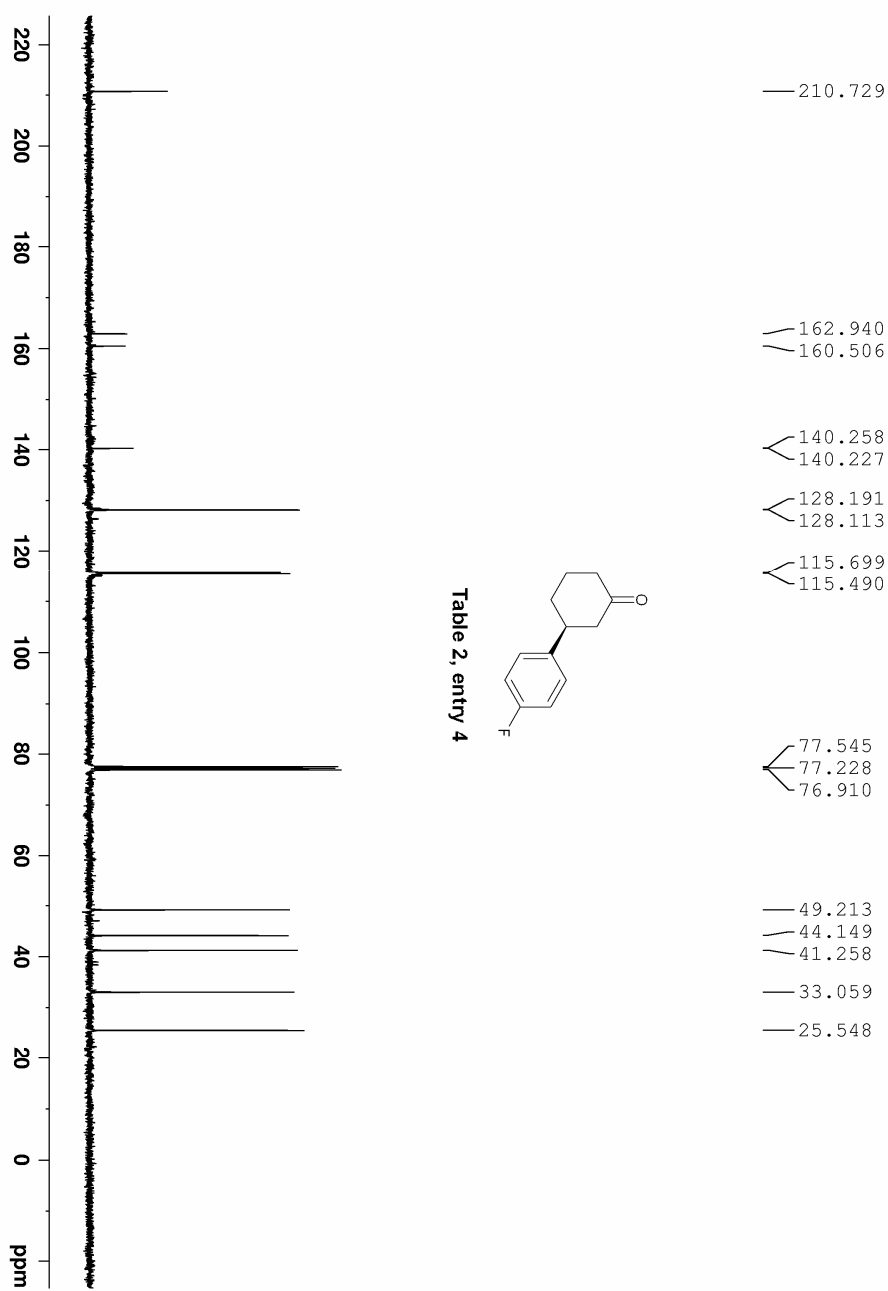

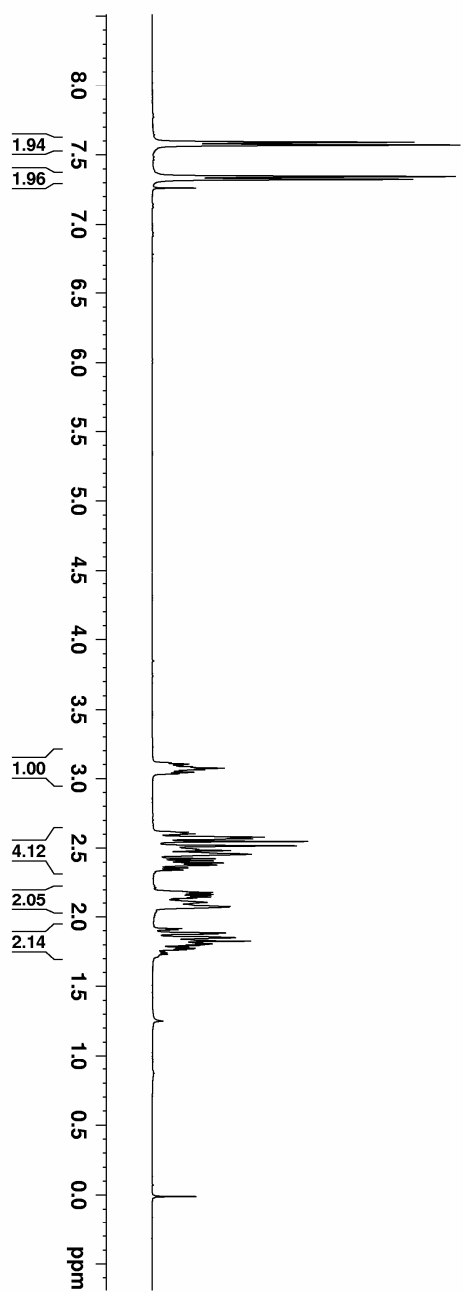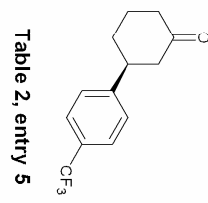

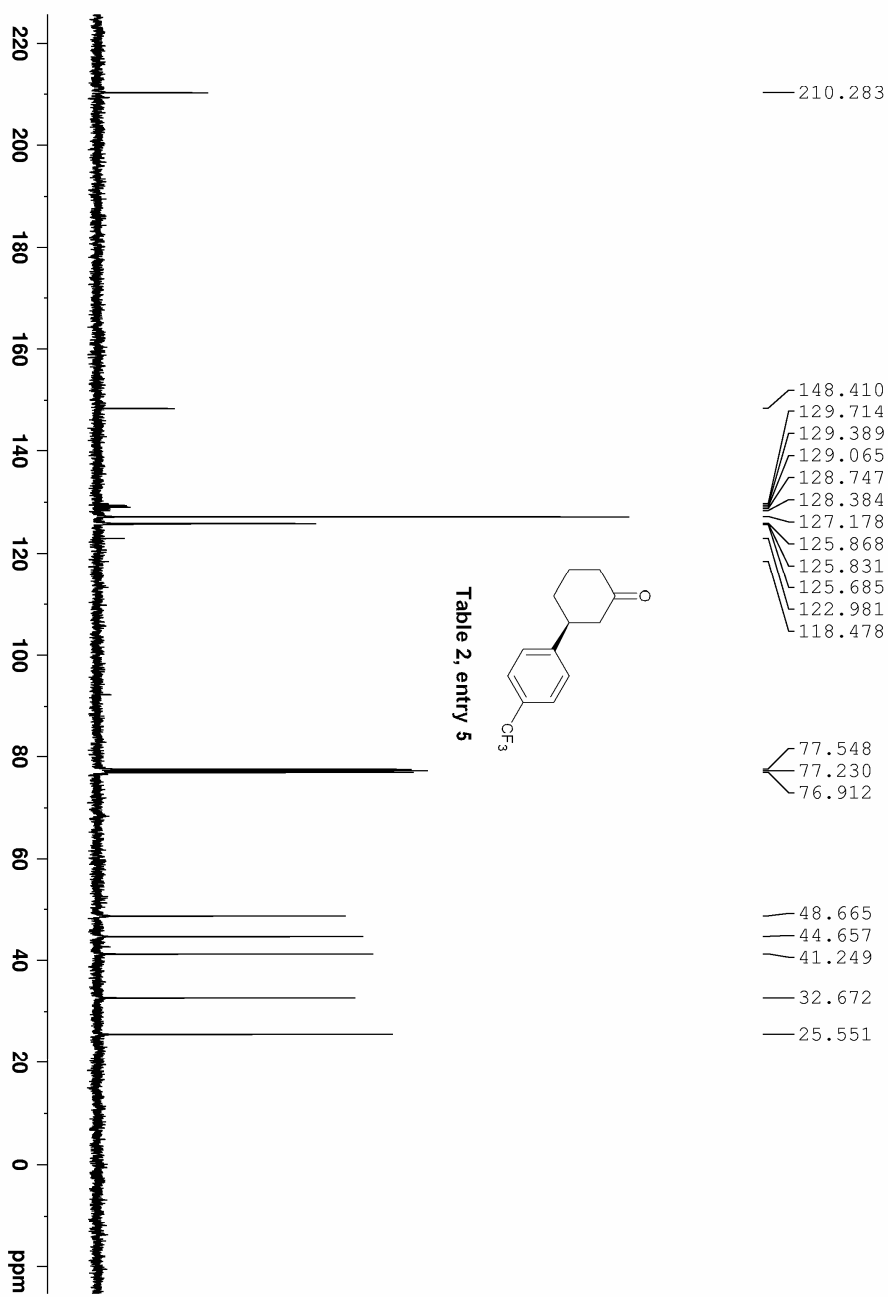

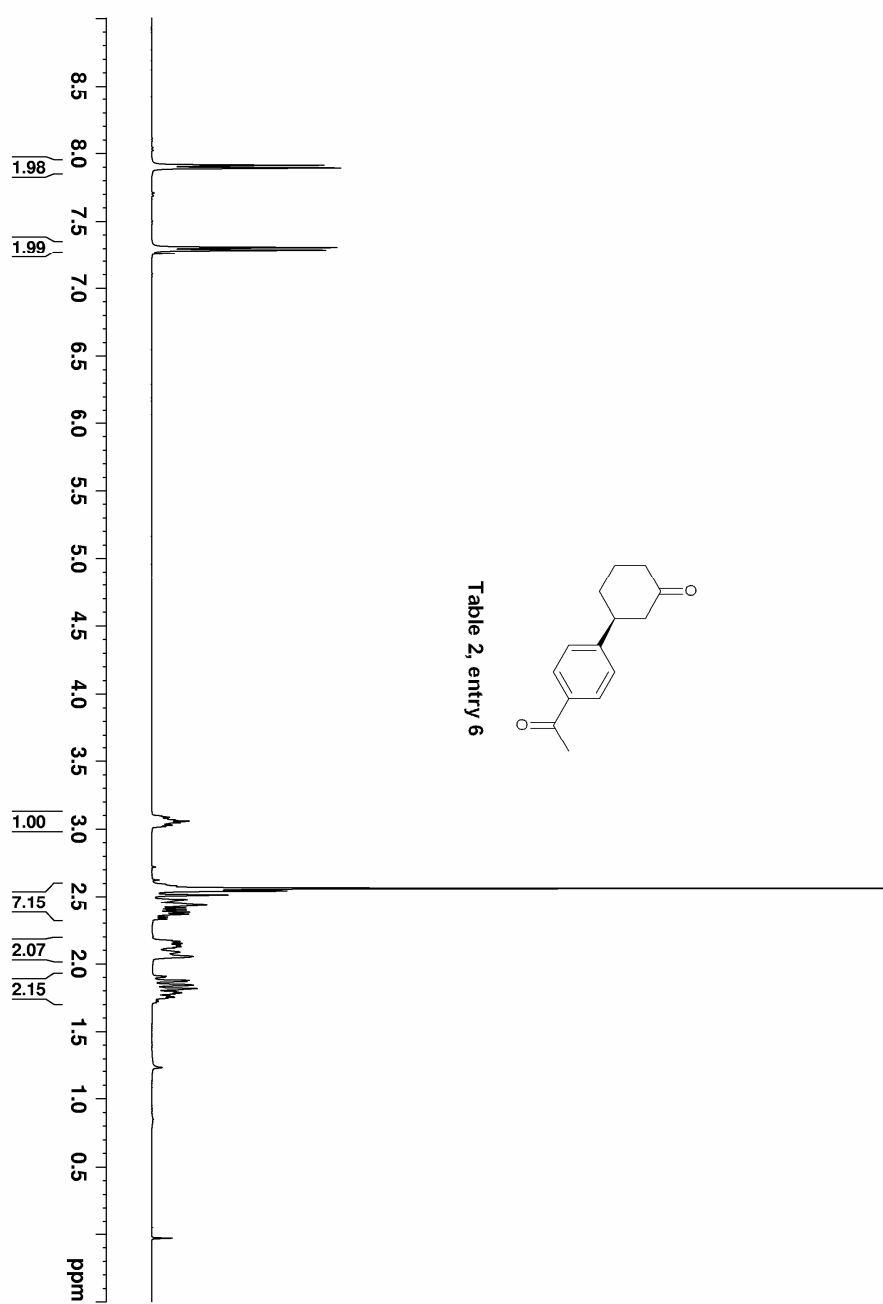

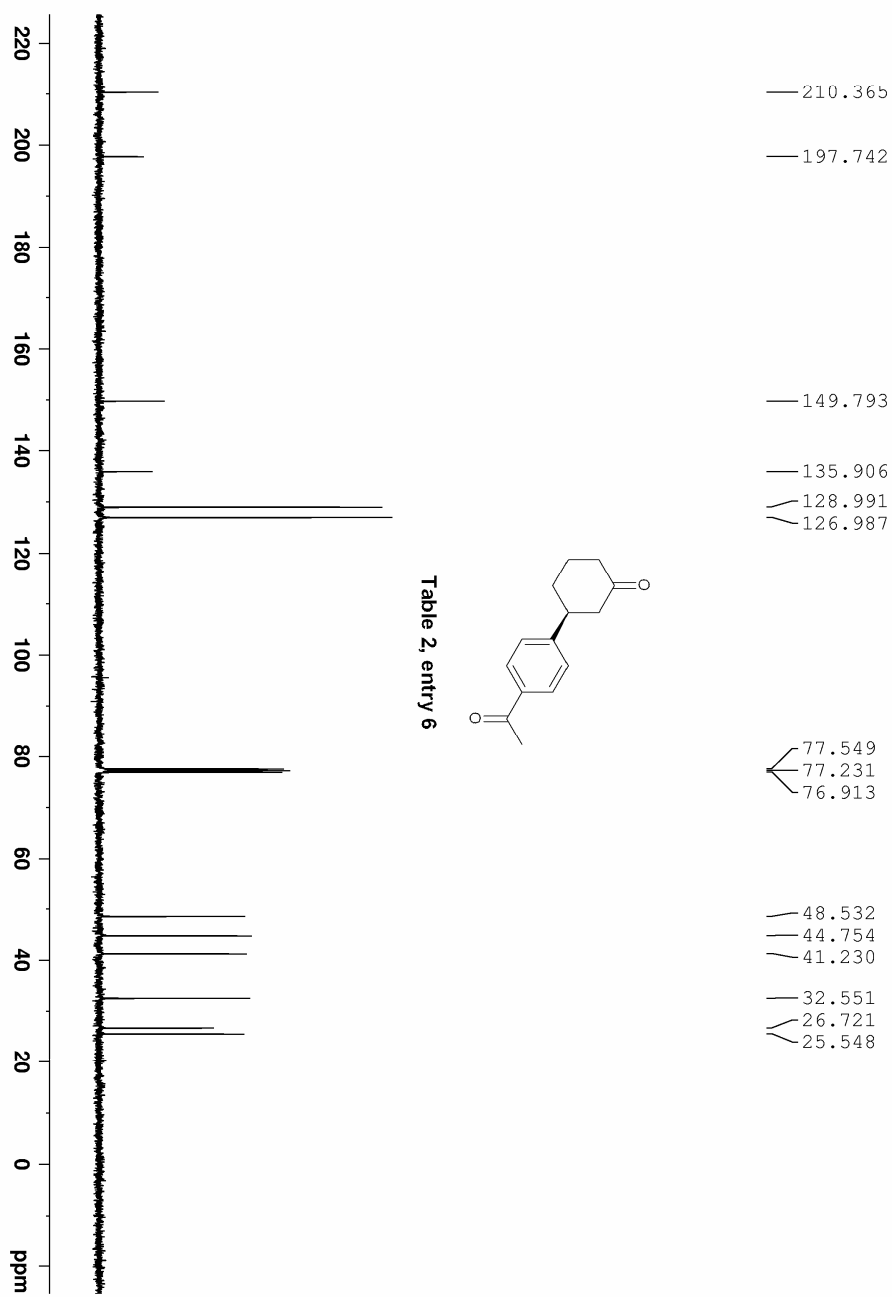

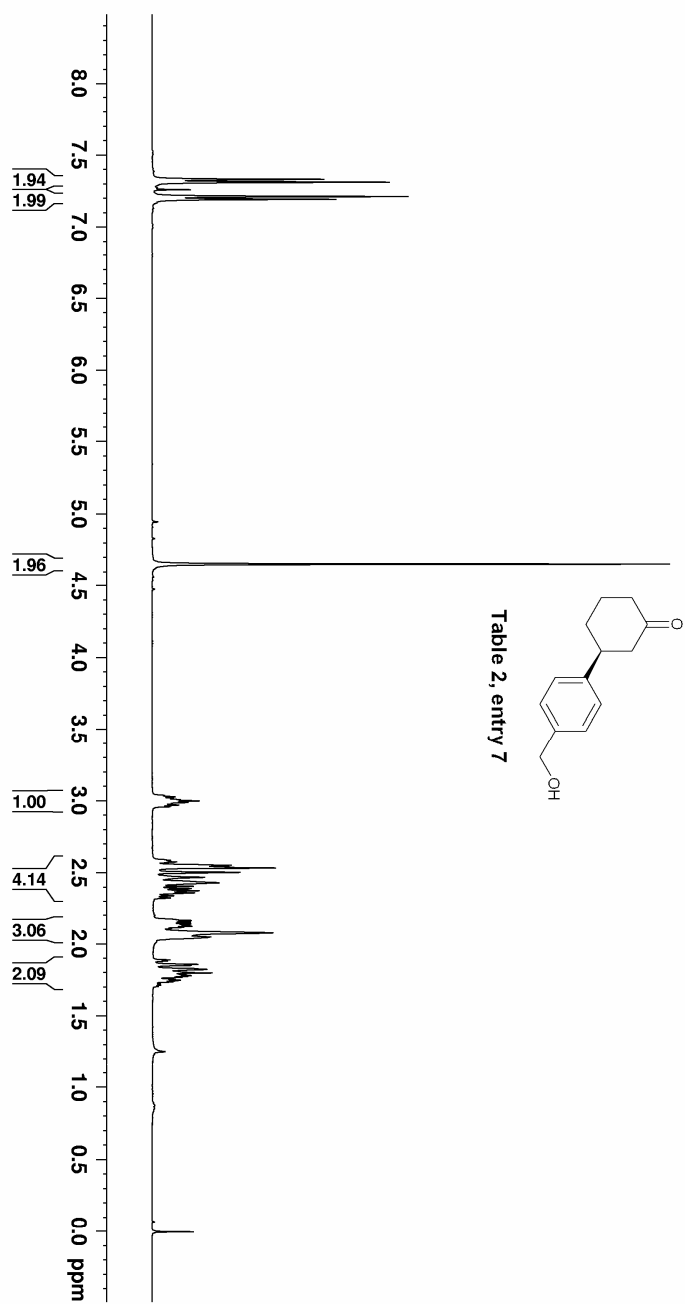



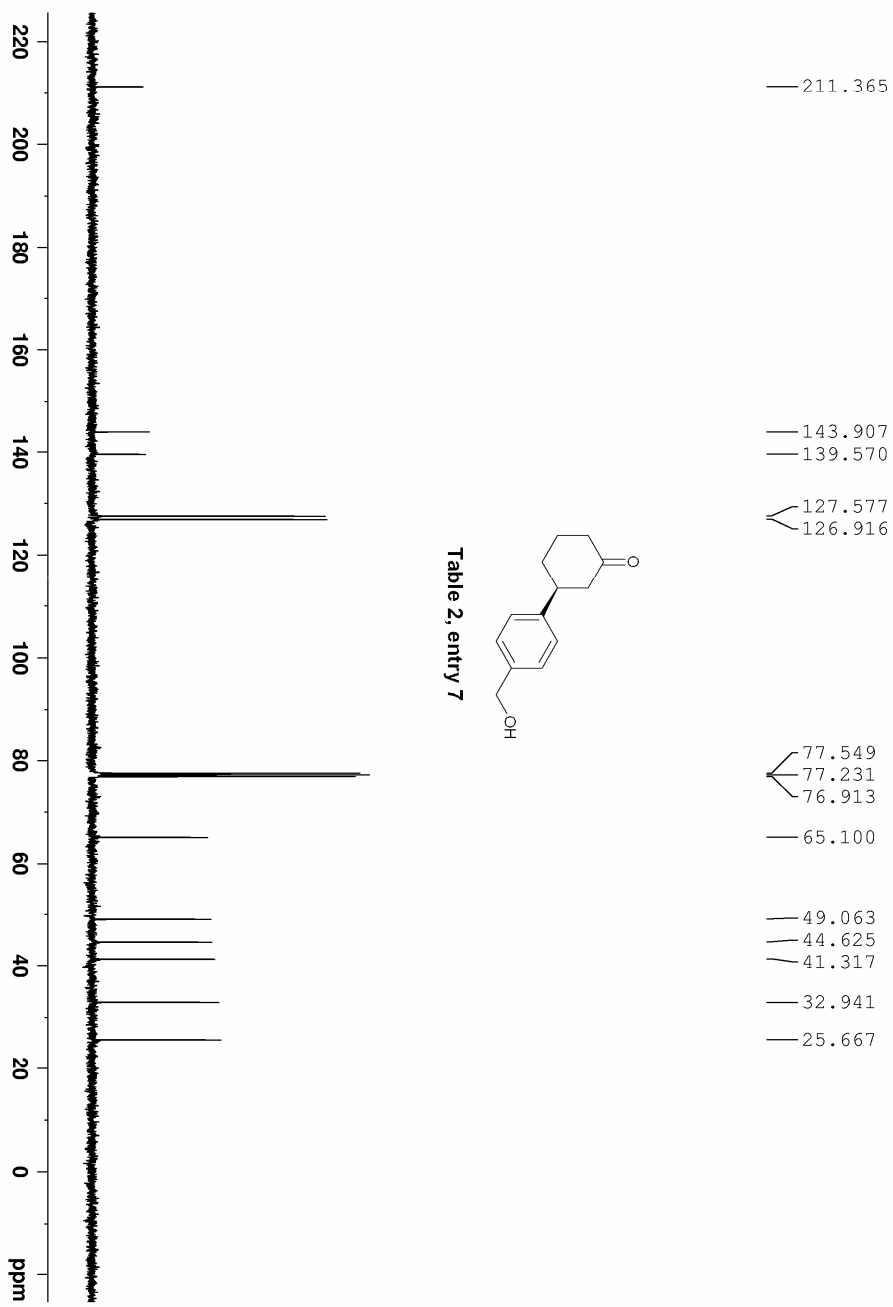

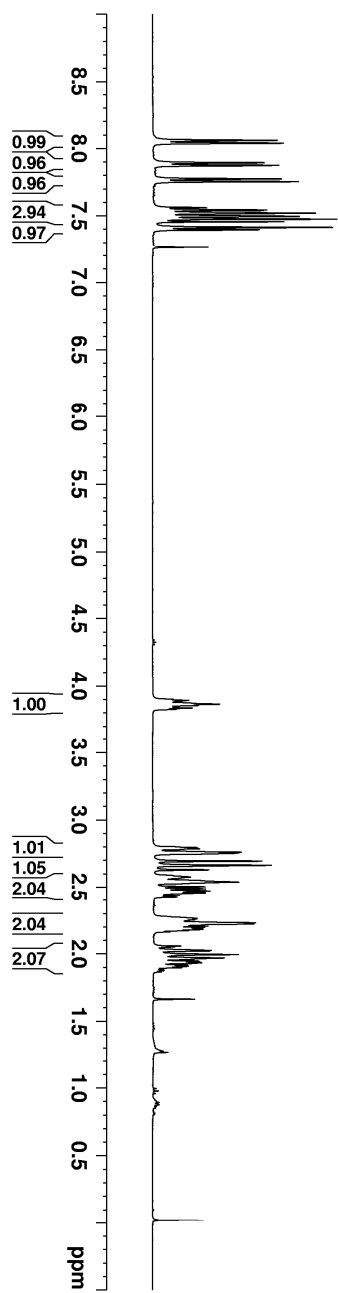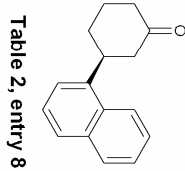

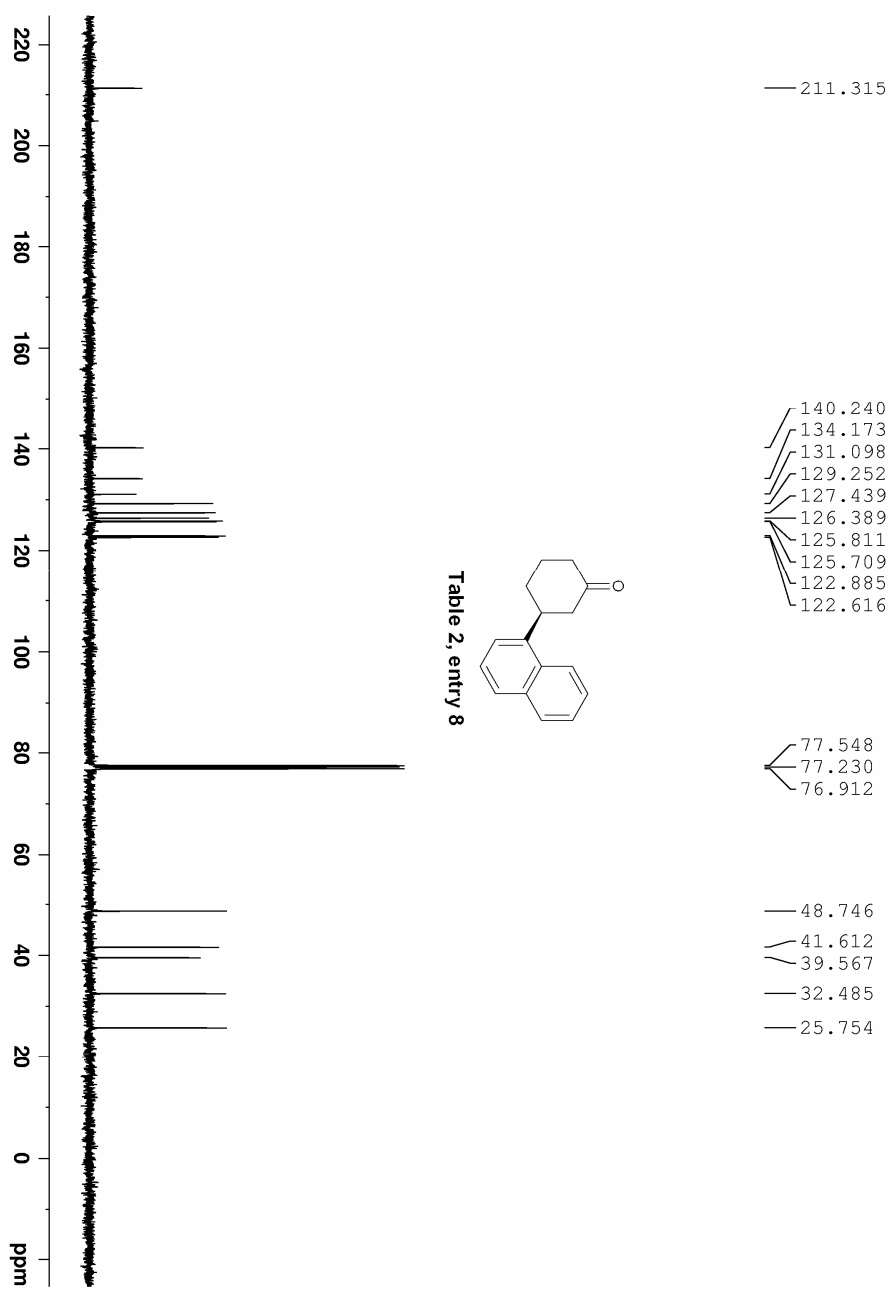

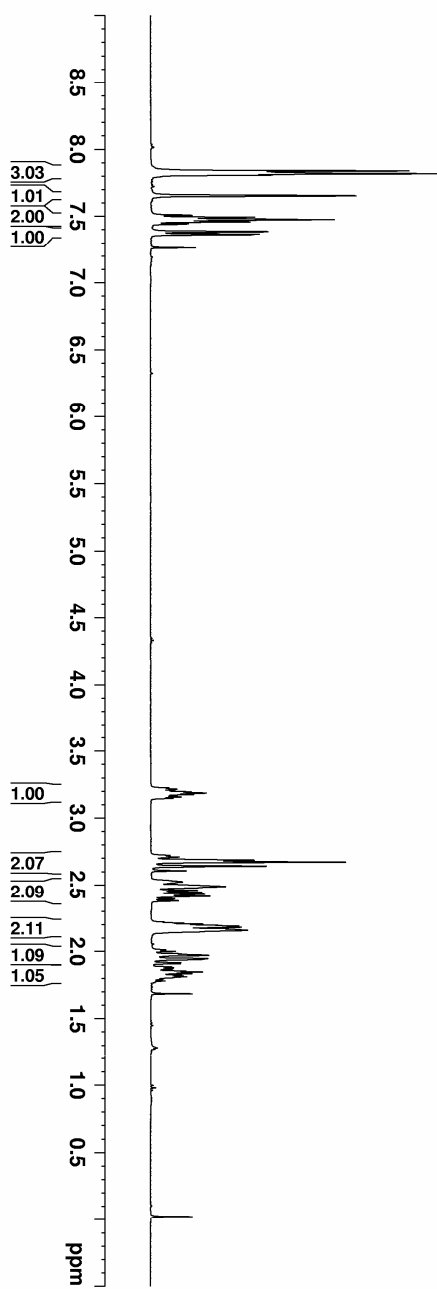

Table 2, entry 9

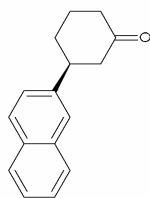

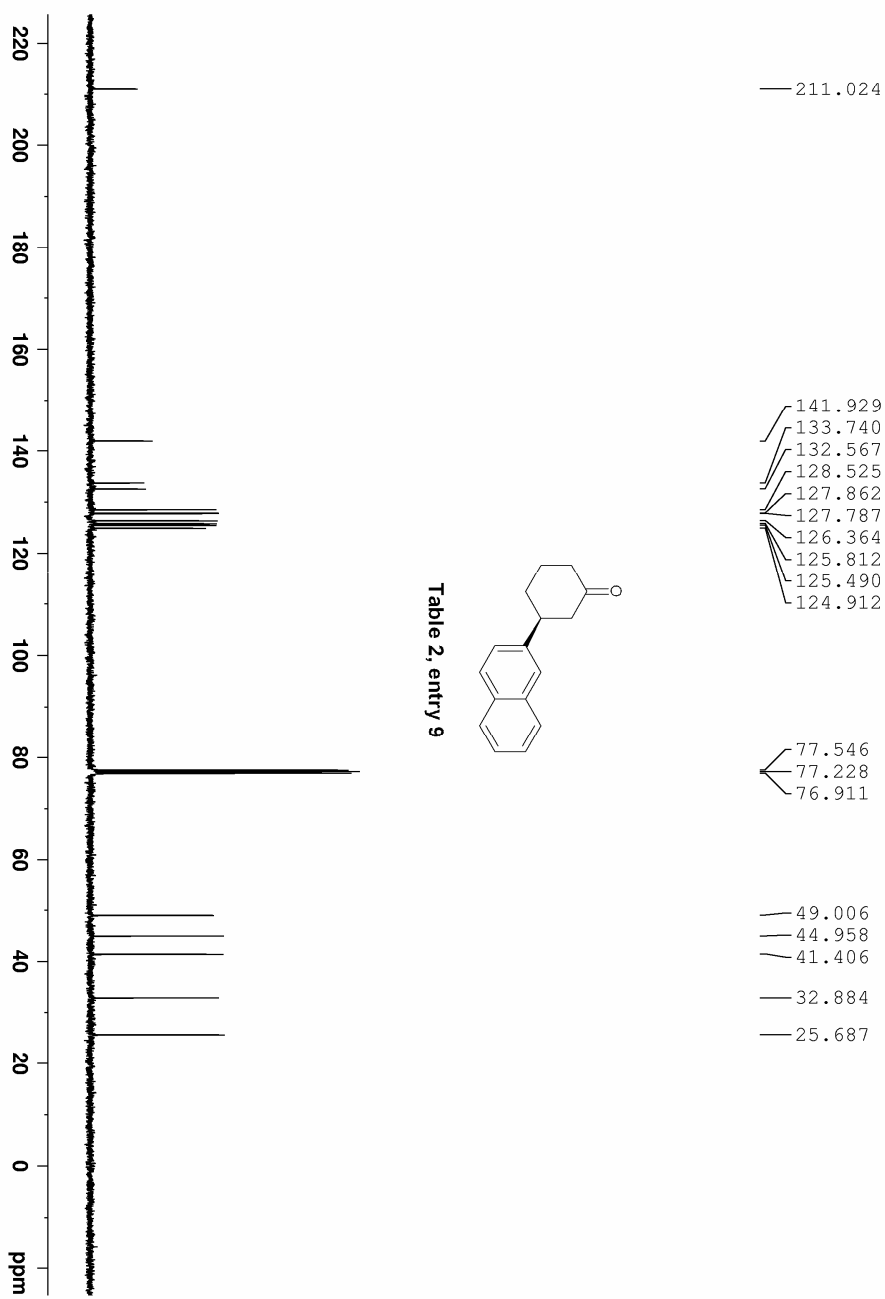

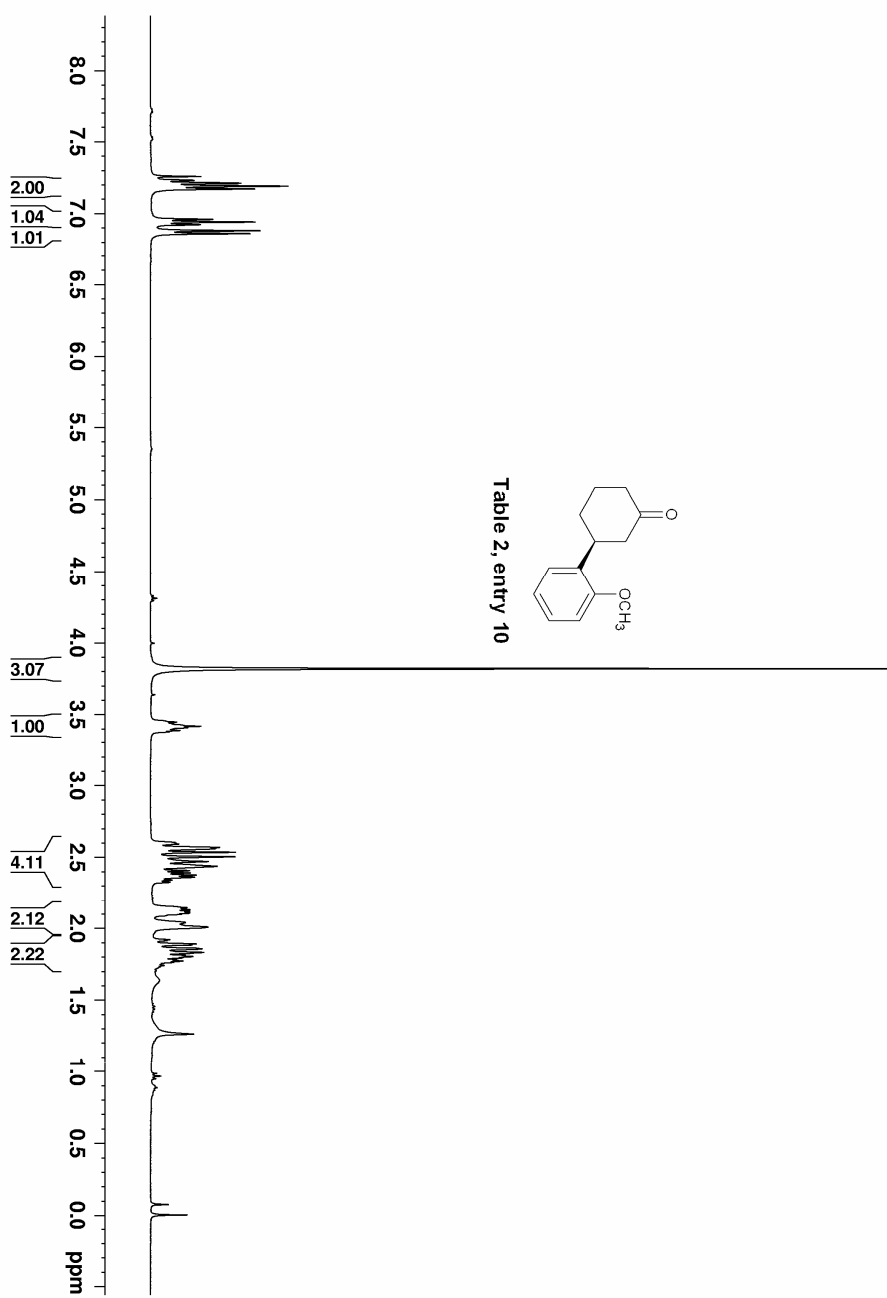

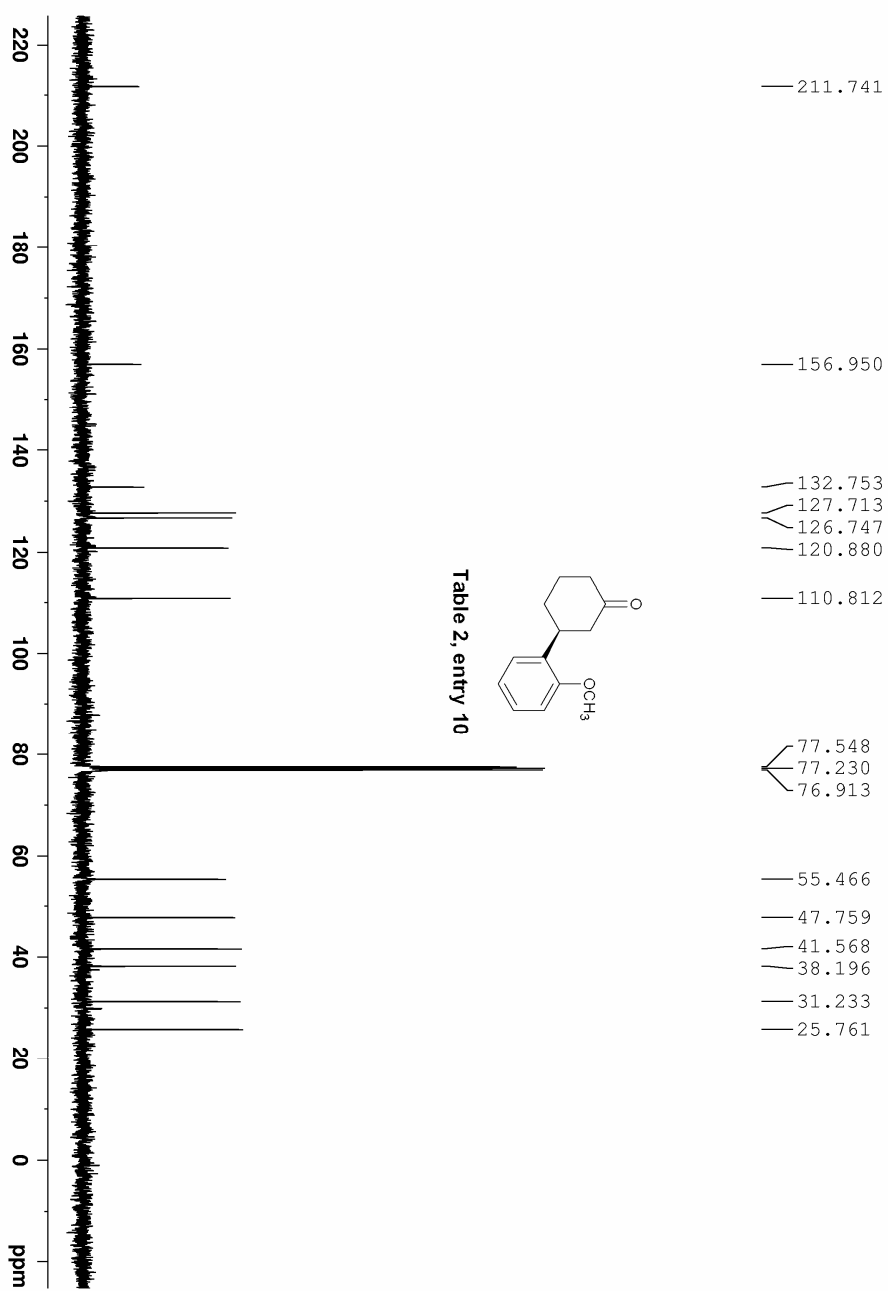

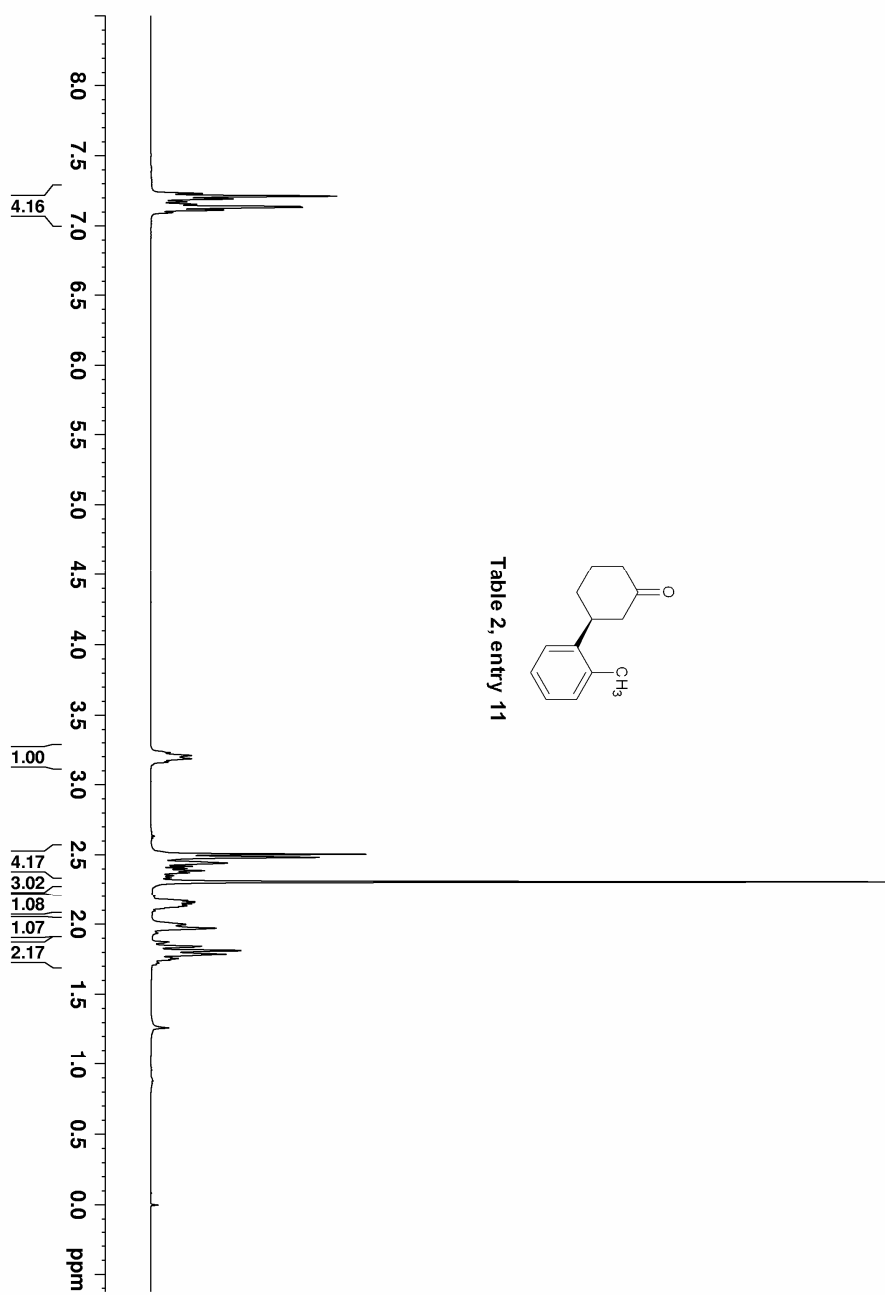



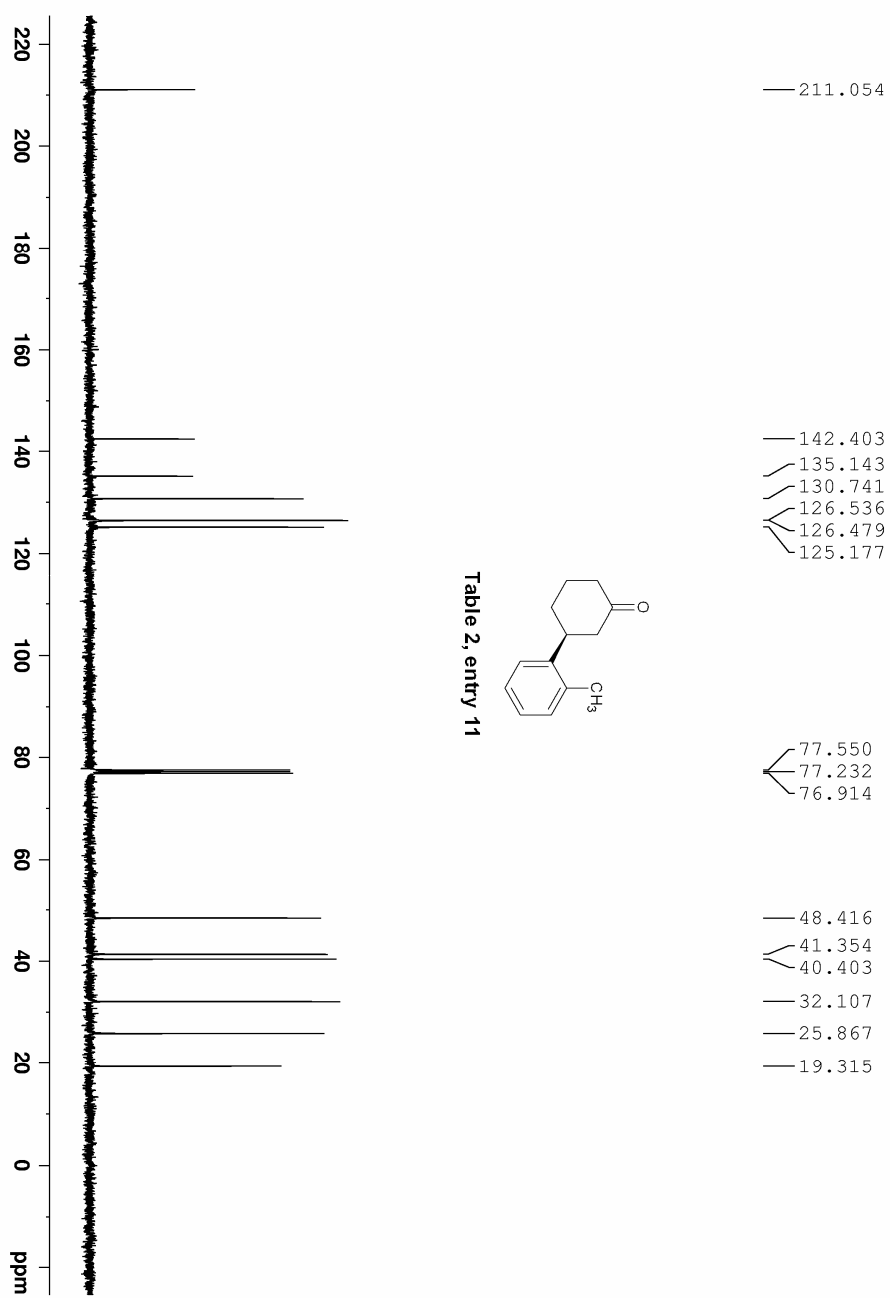

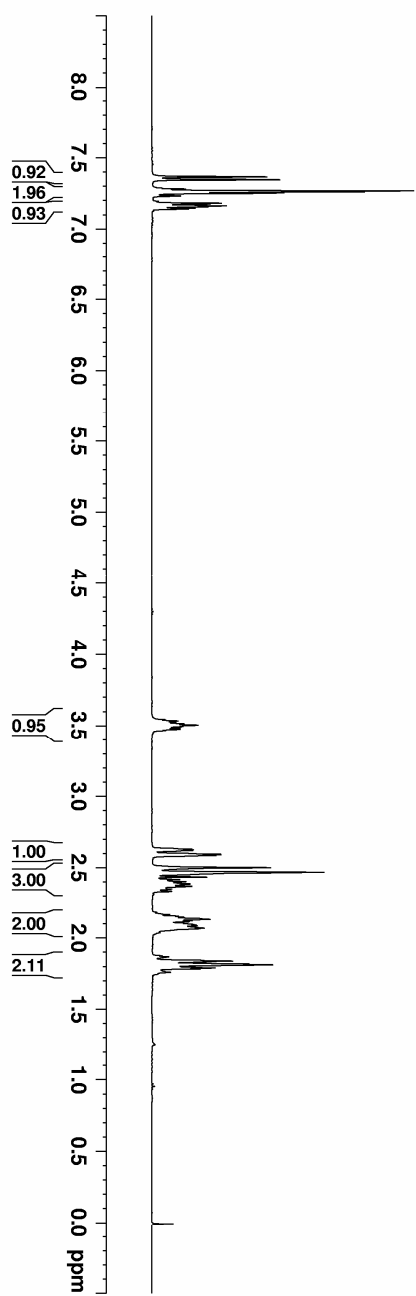

Table 2, entry 12

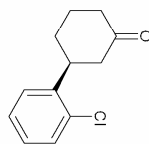

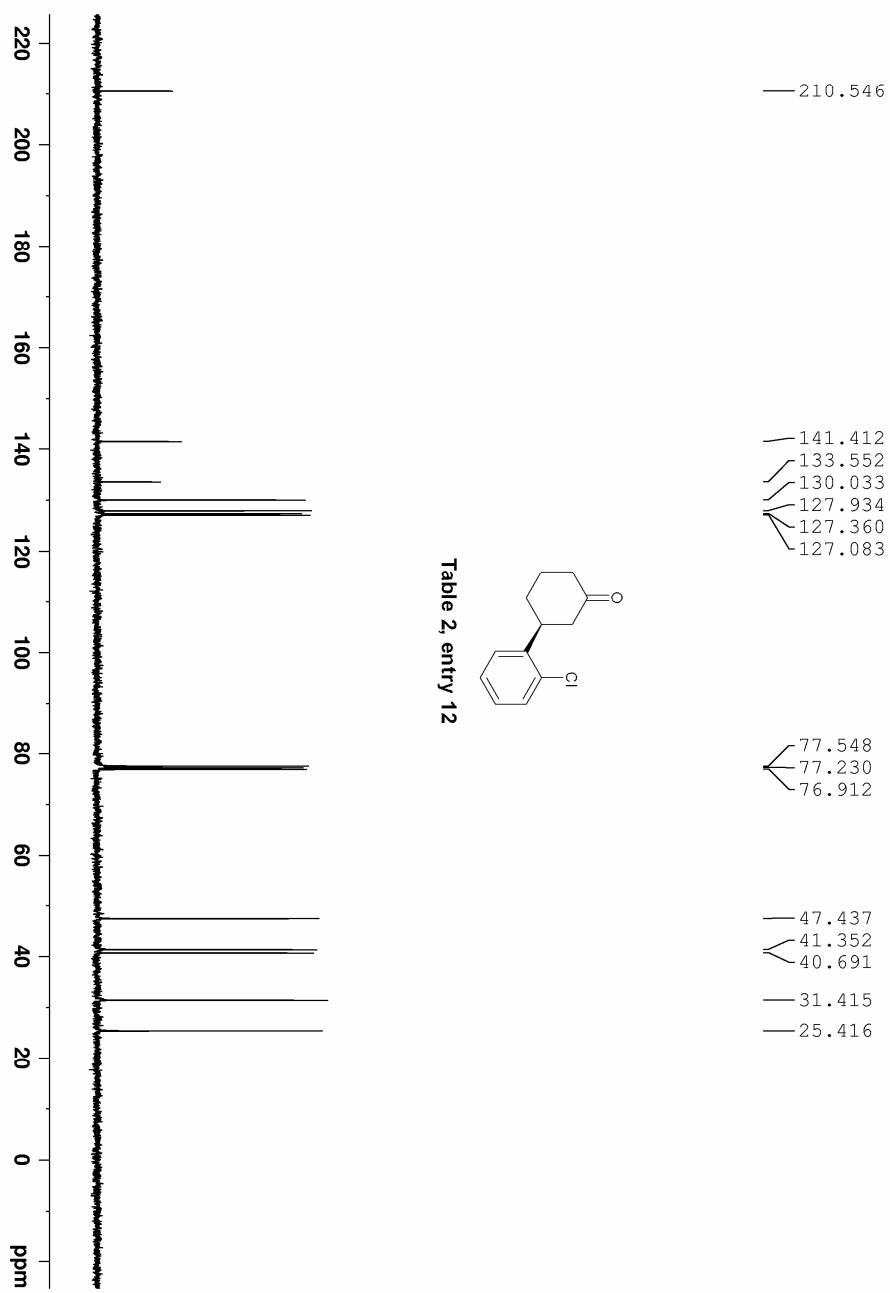

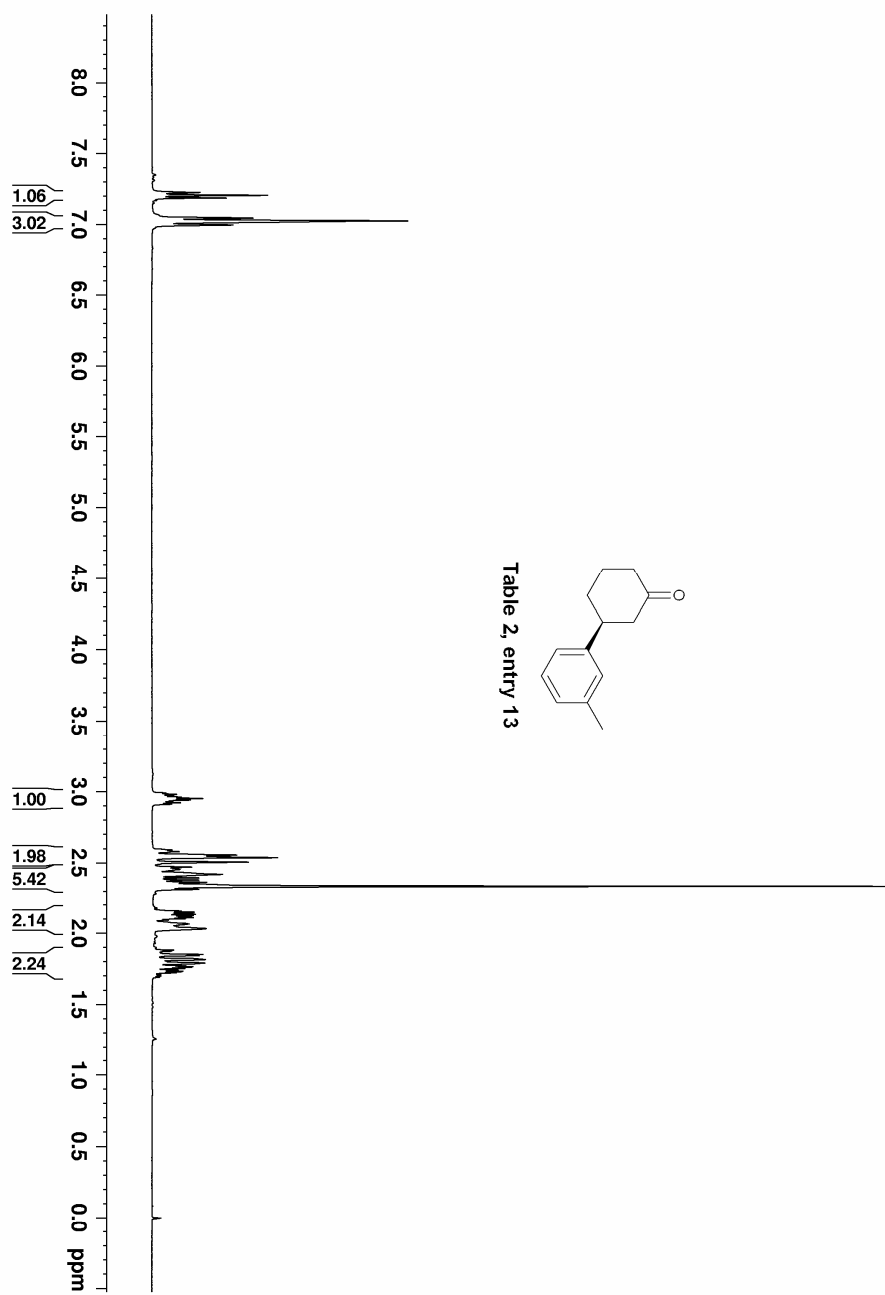

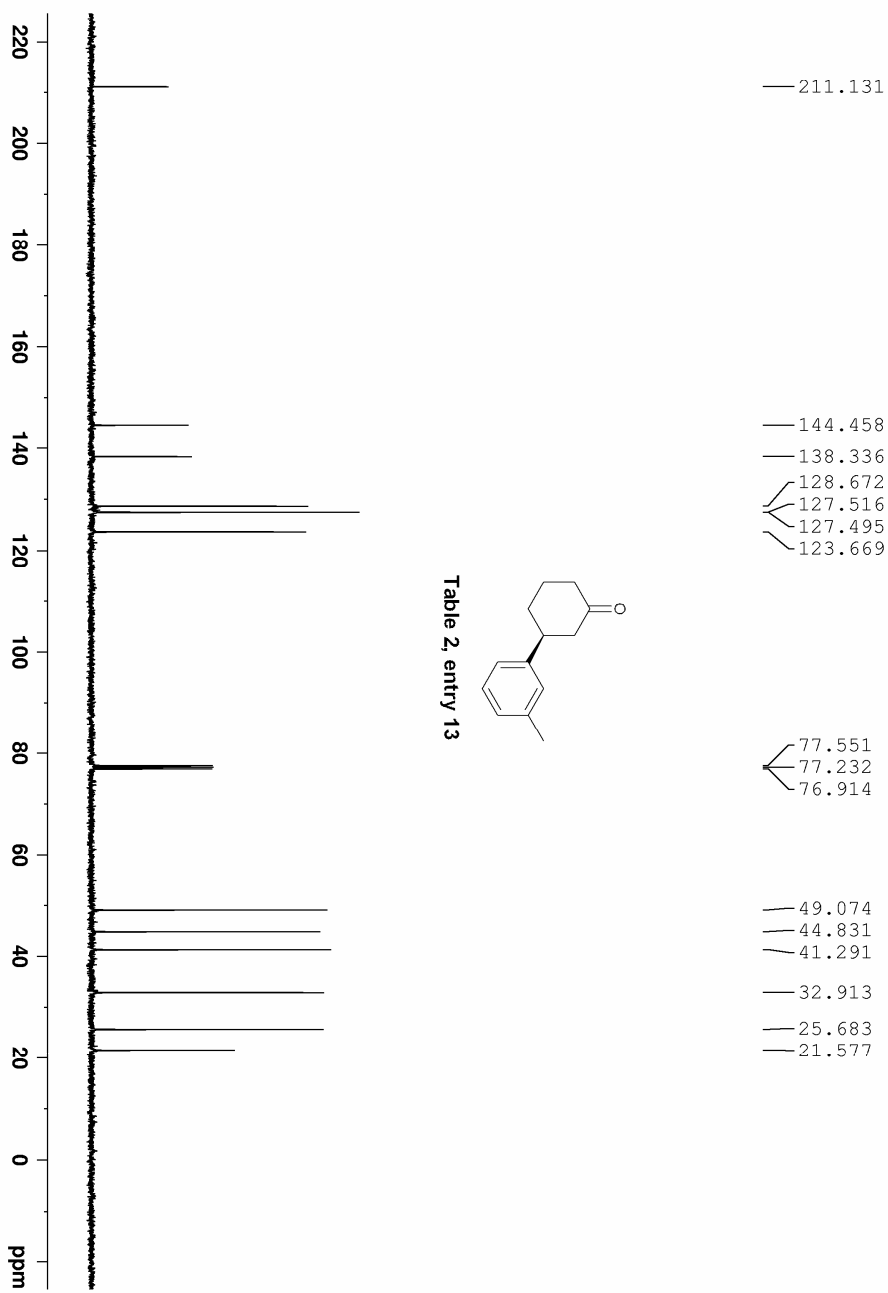

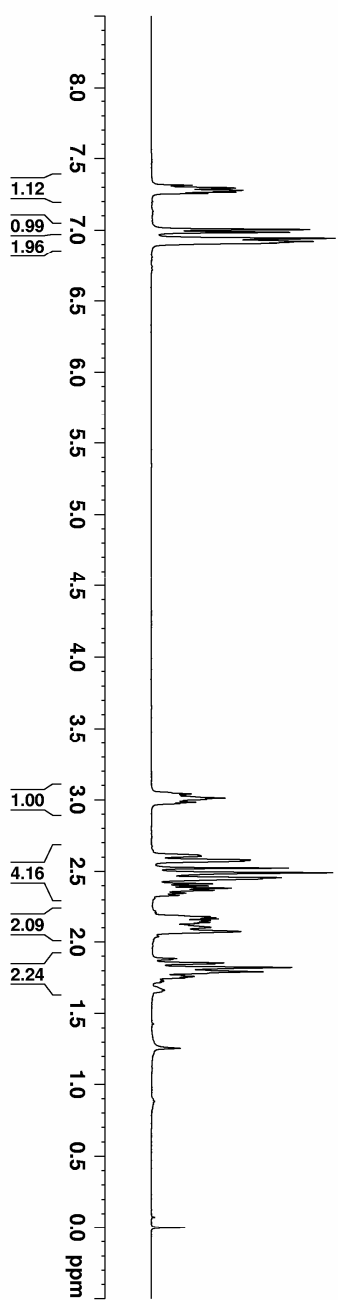

Table 2, entry 14

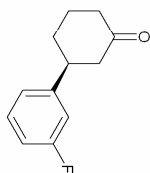

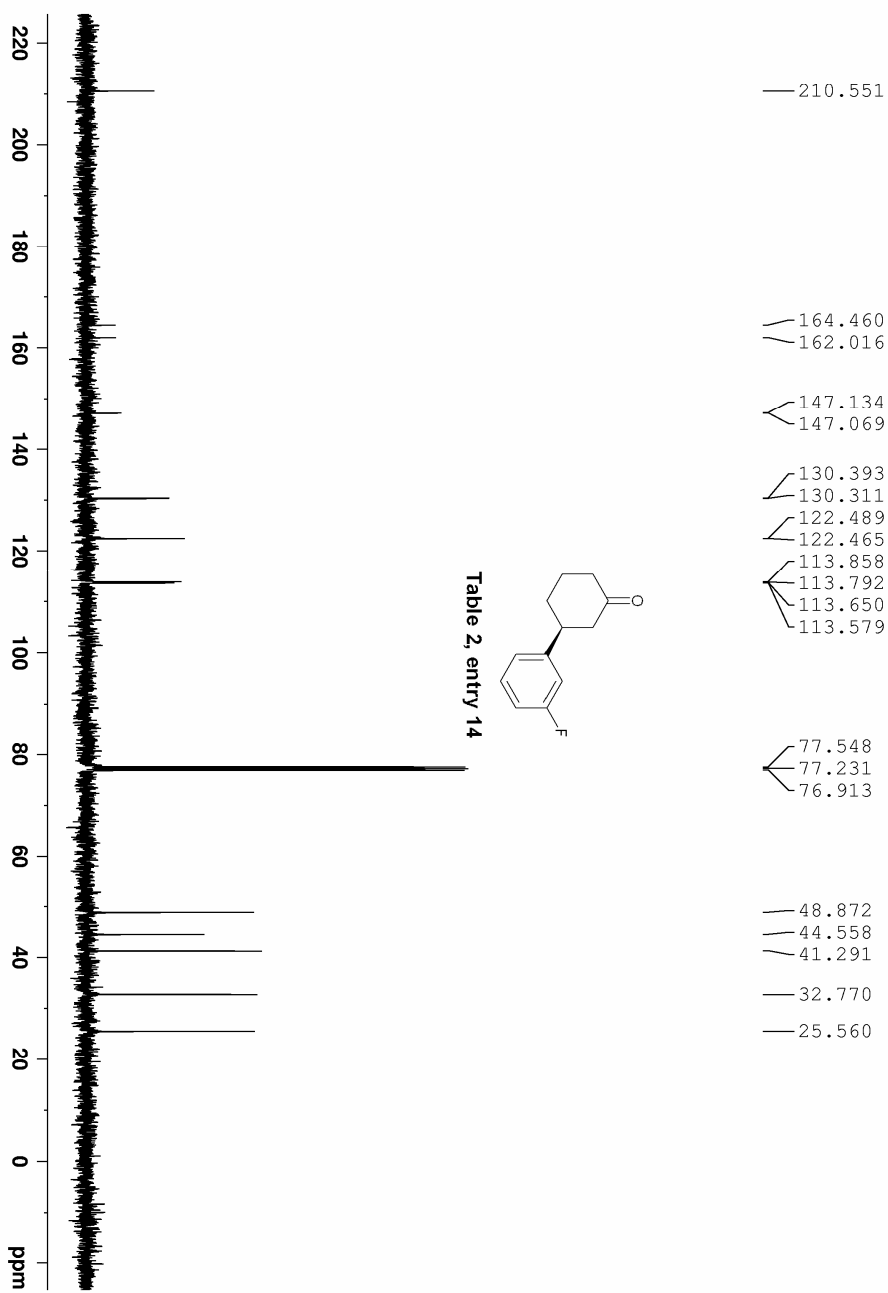

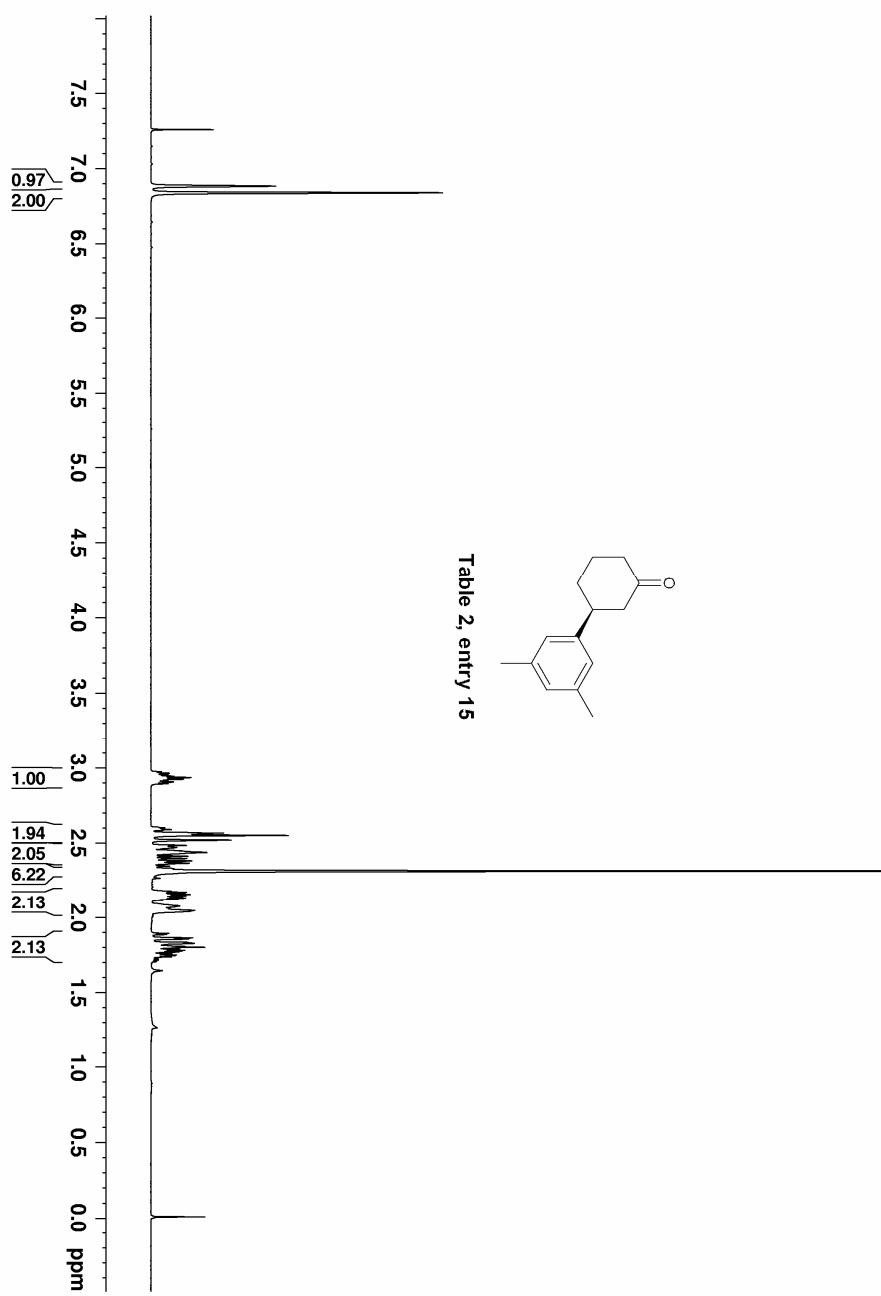



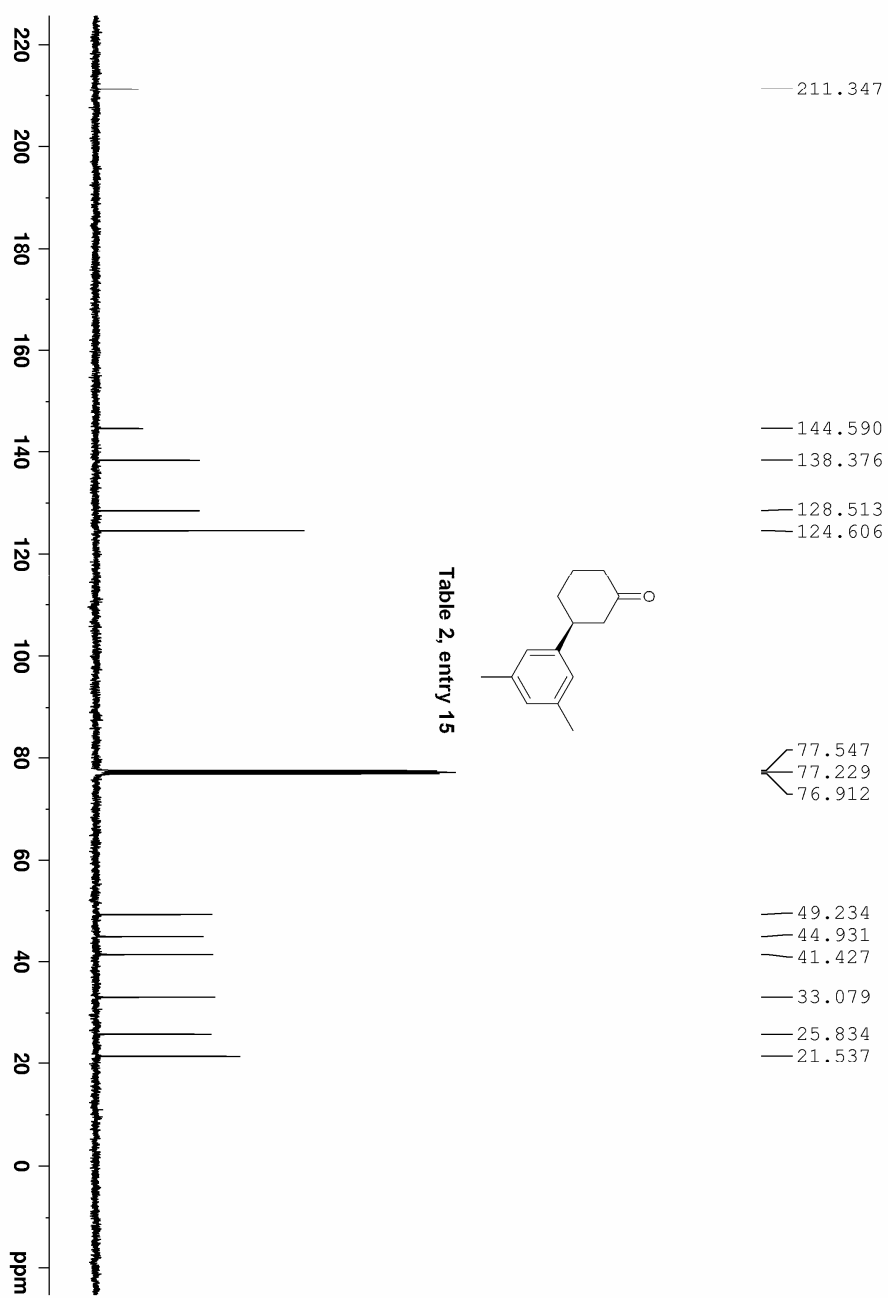

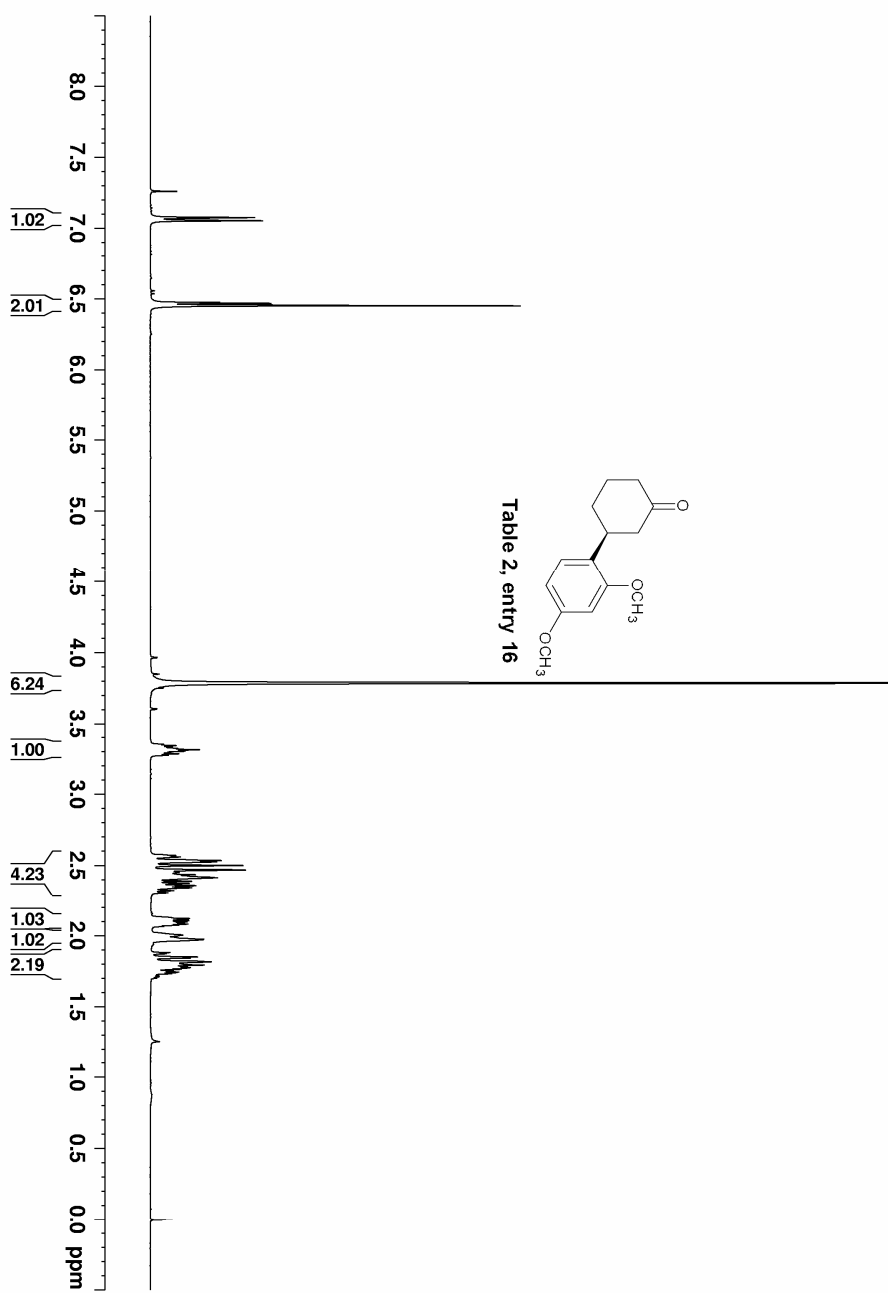

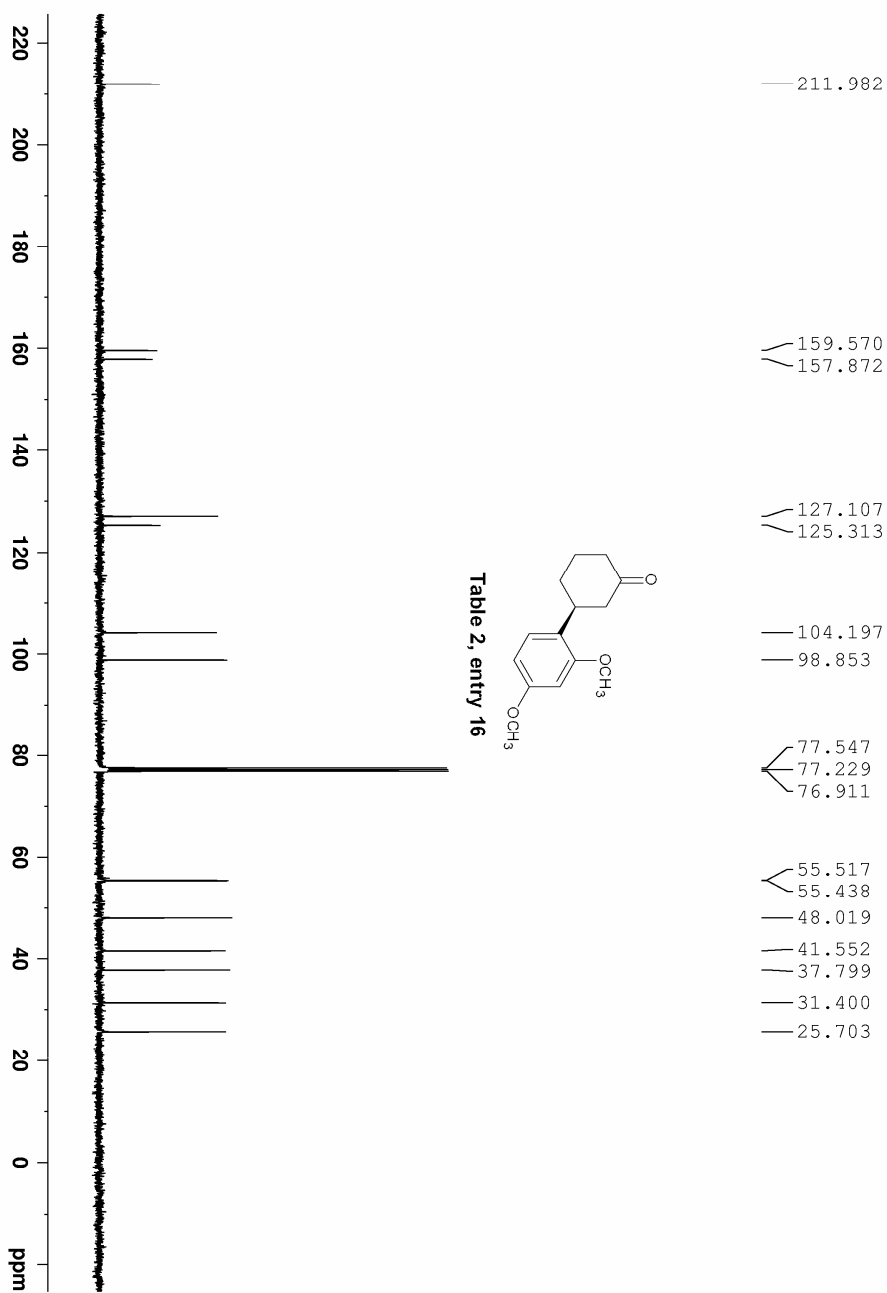

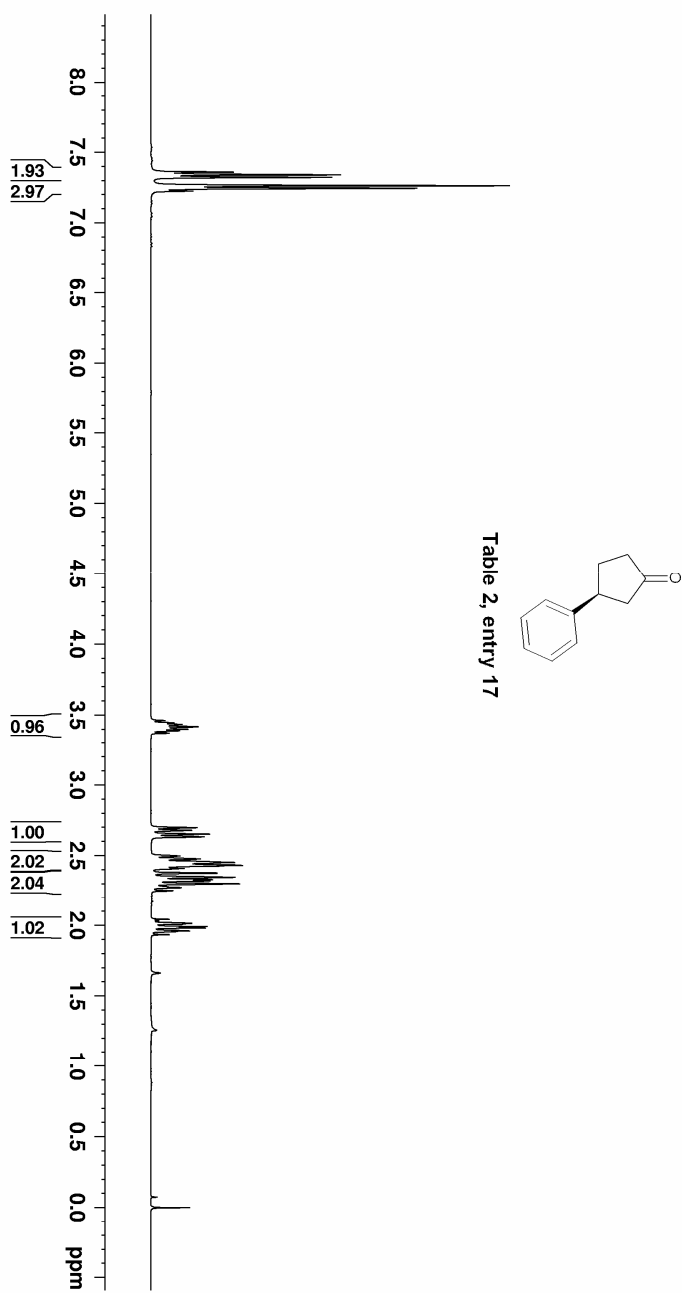

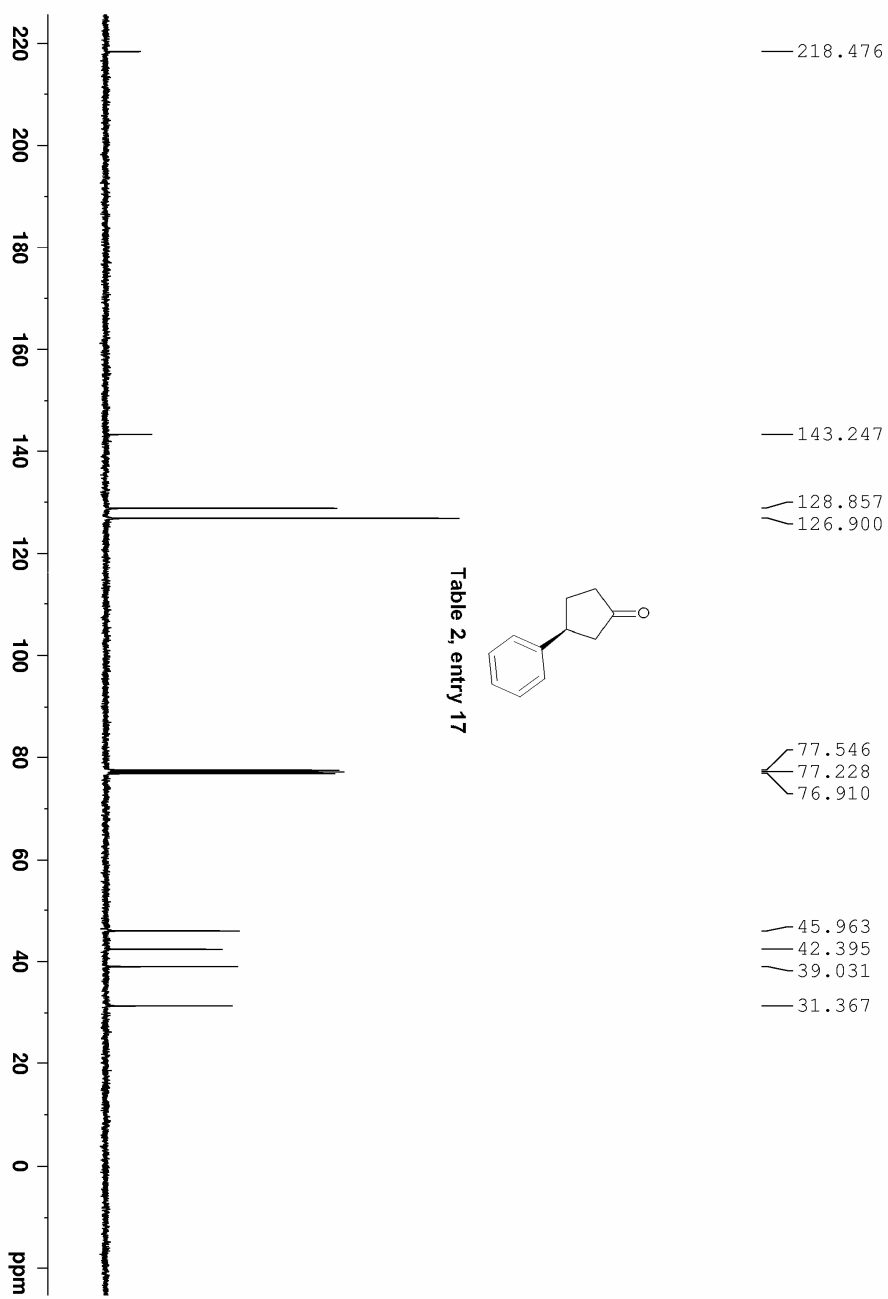

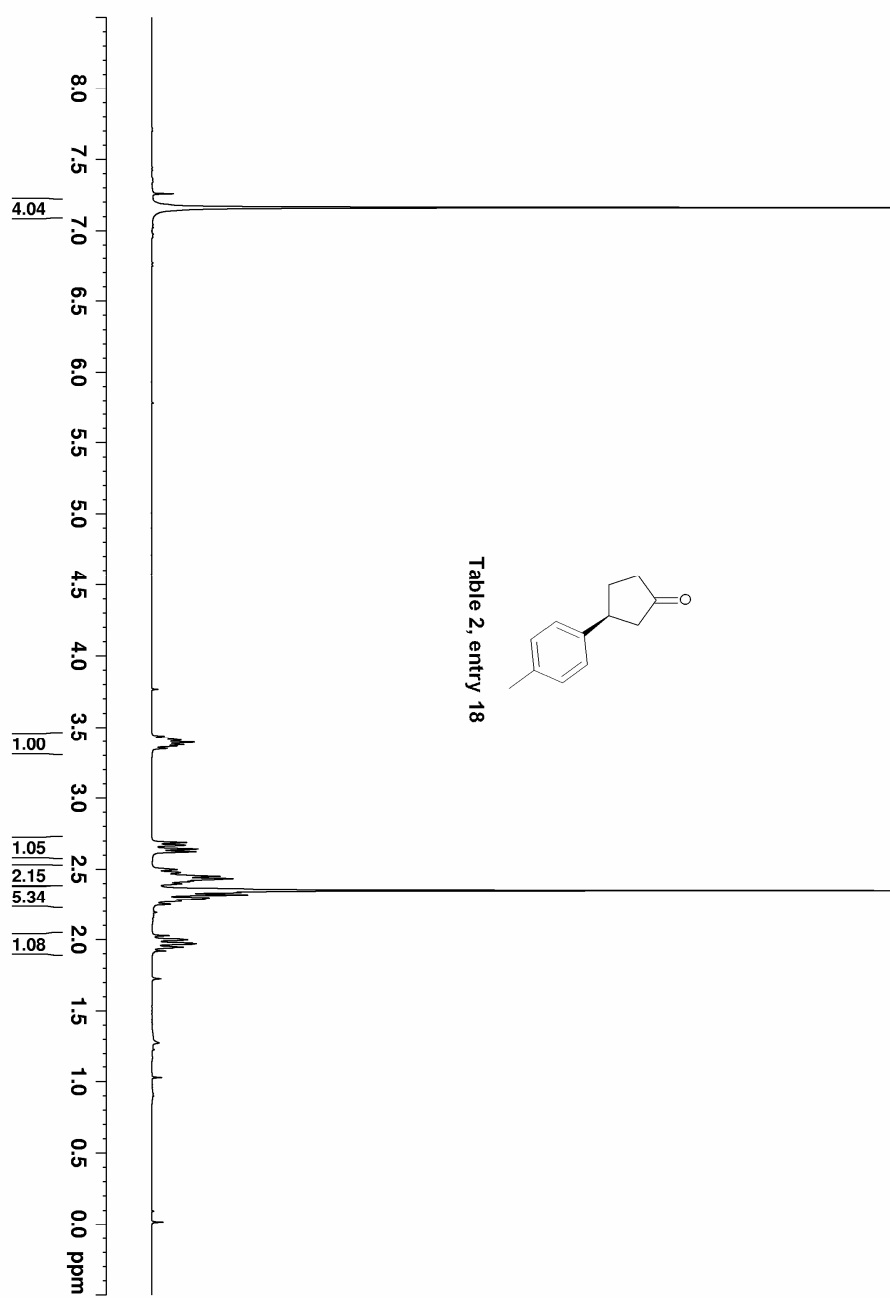

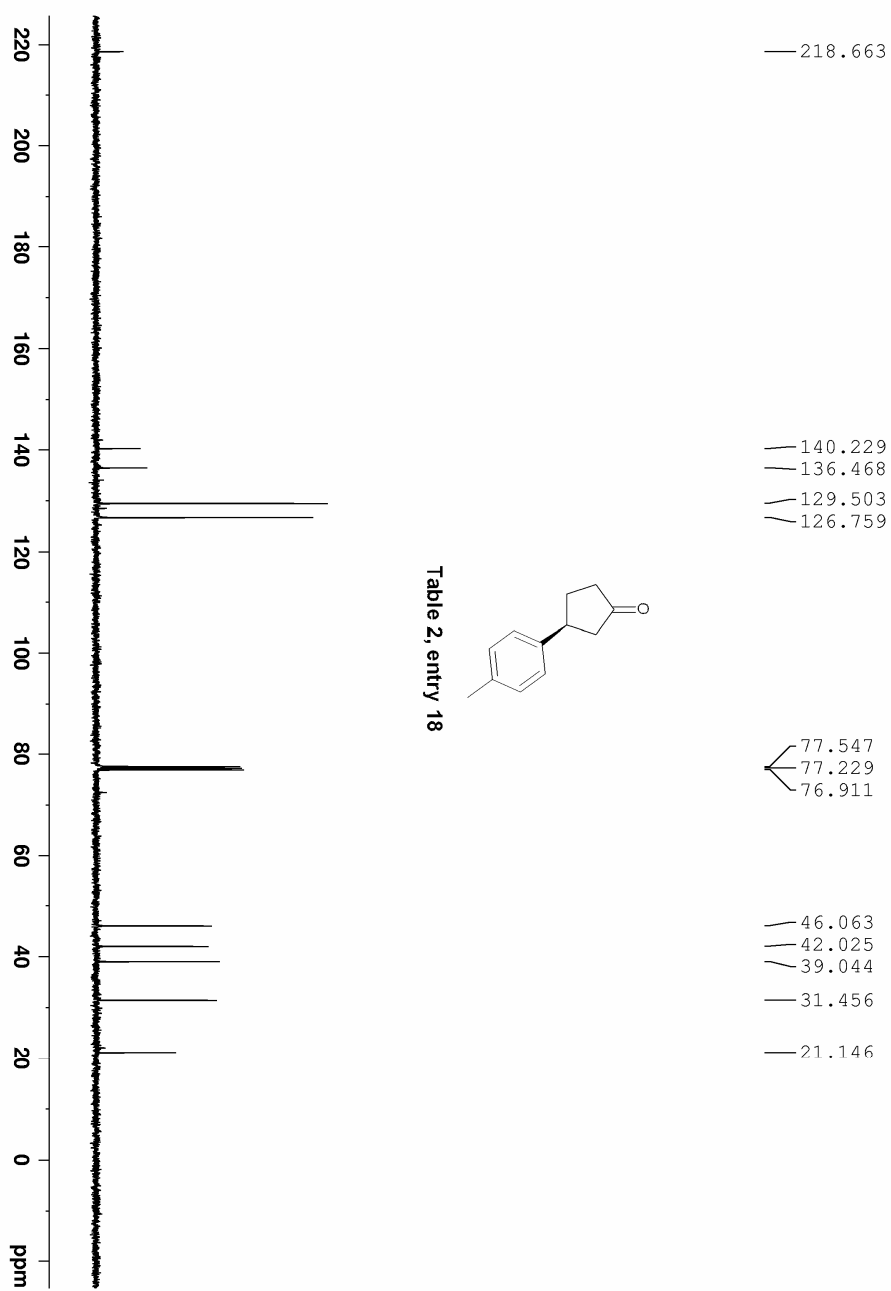

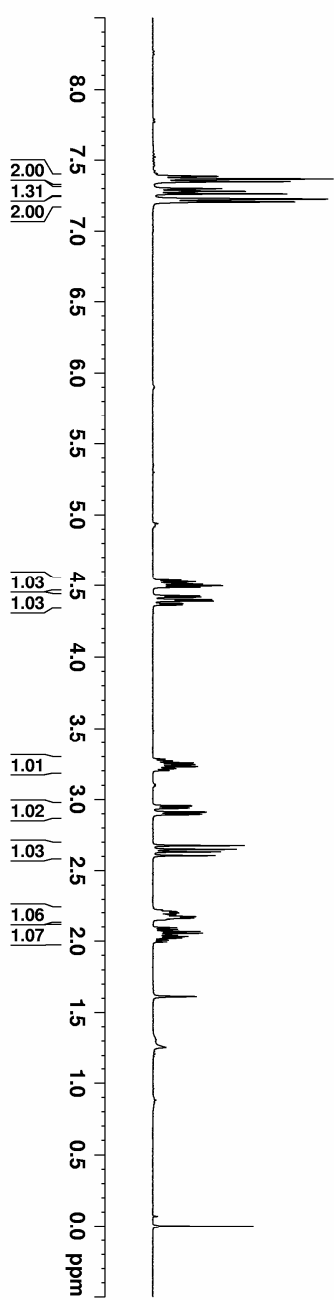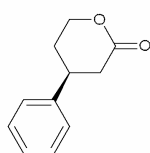

Table 2, entry 19



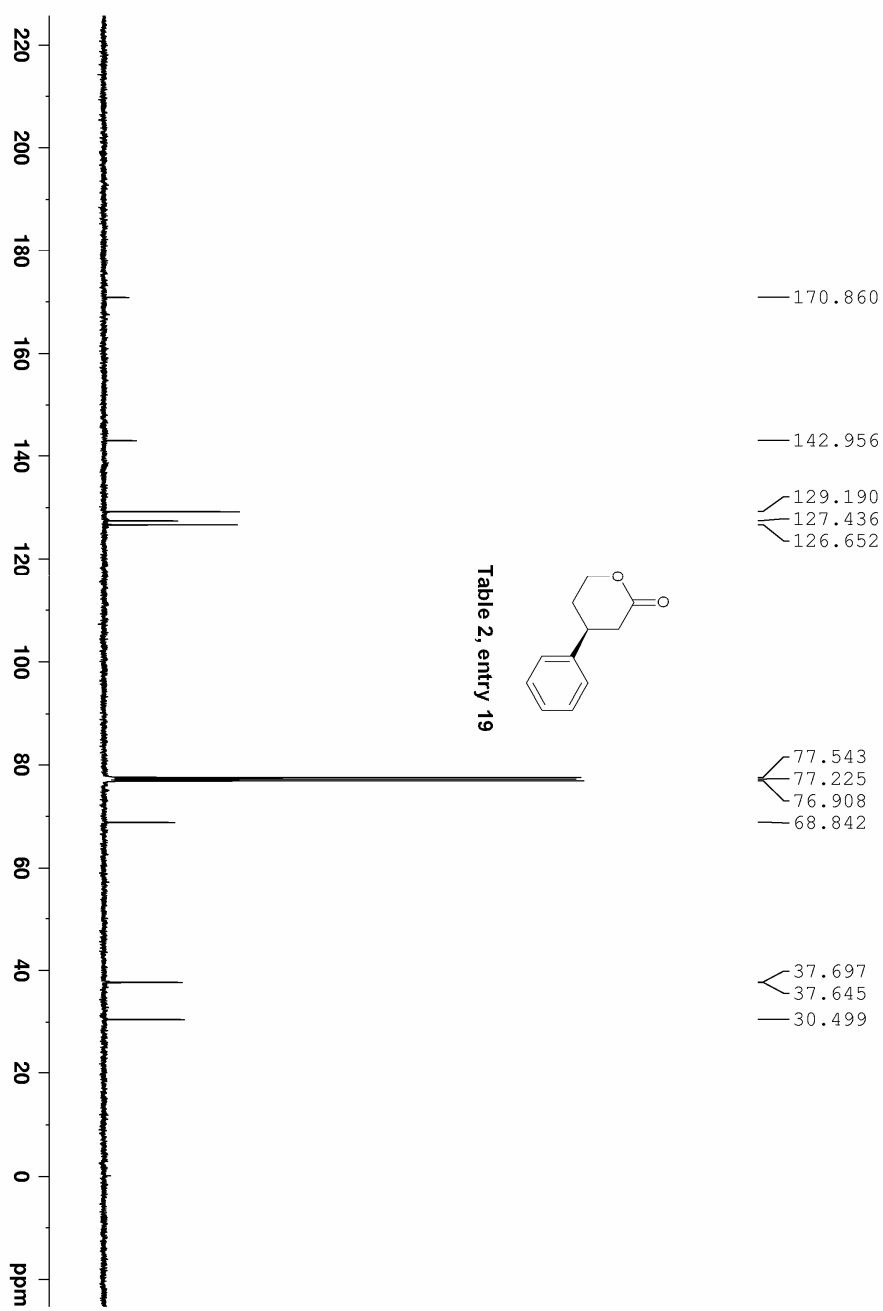

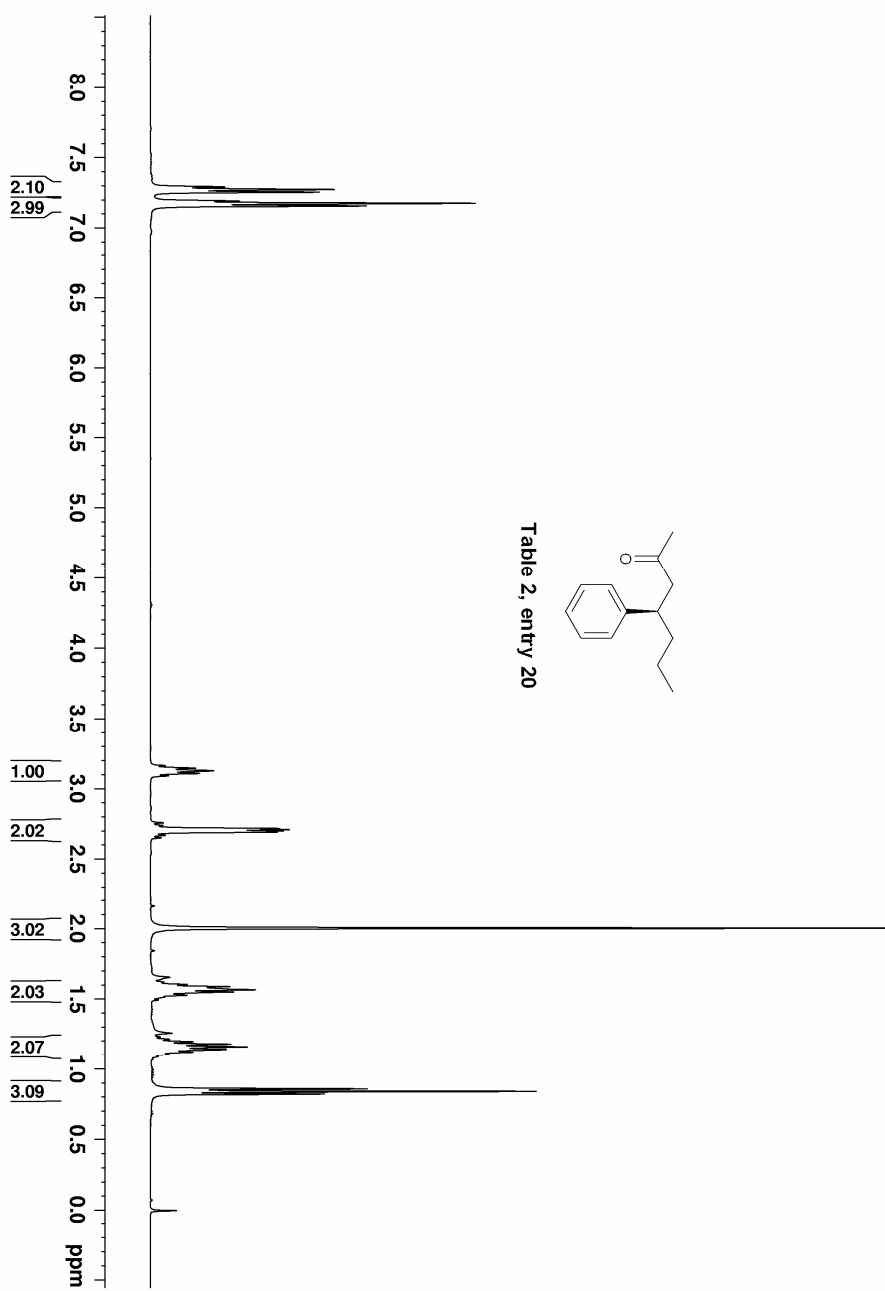

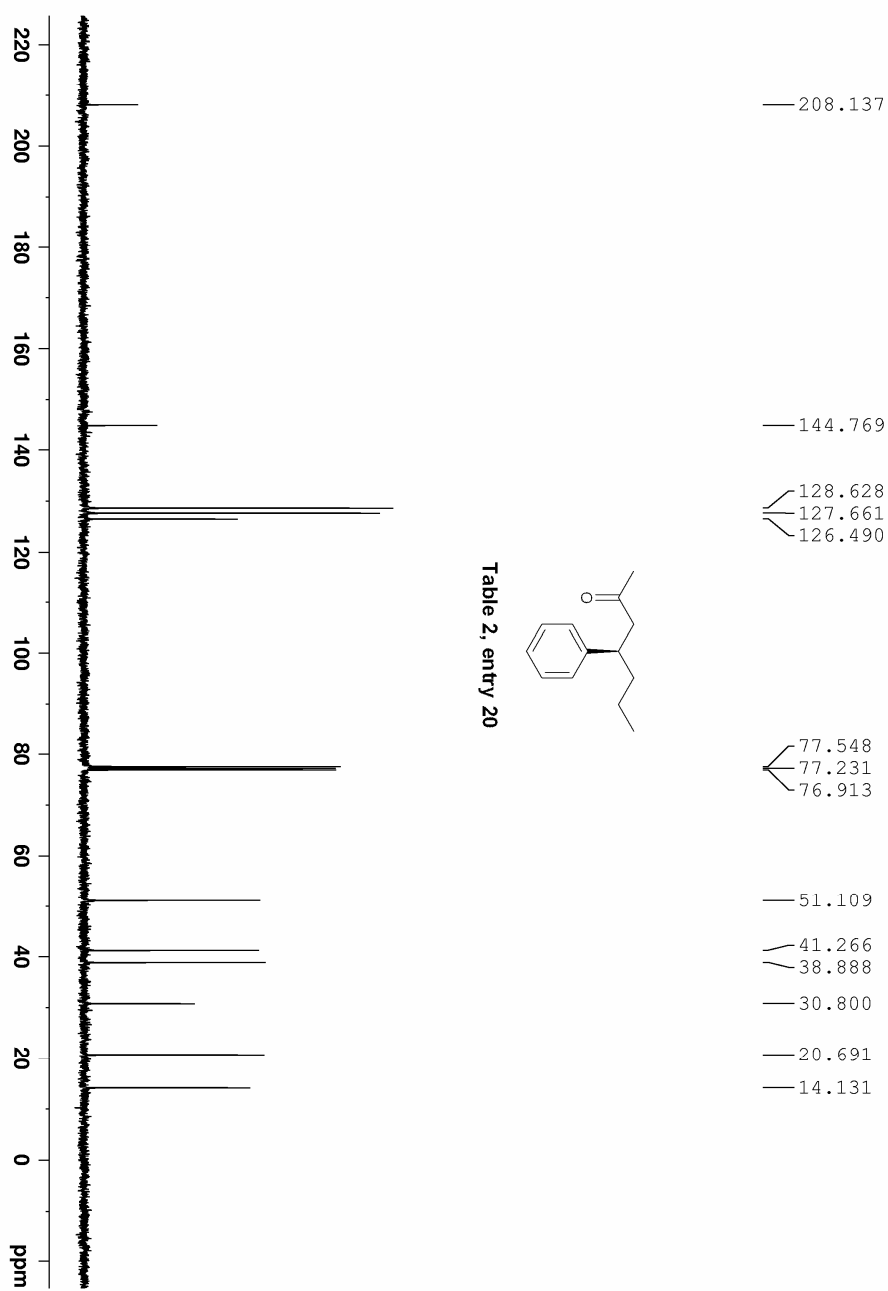

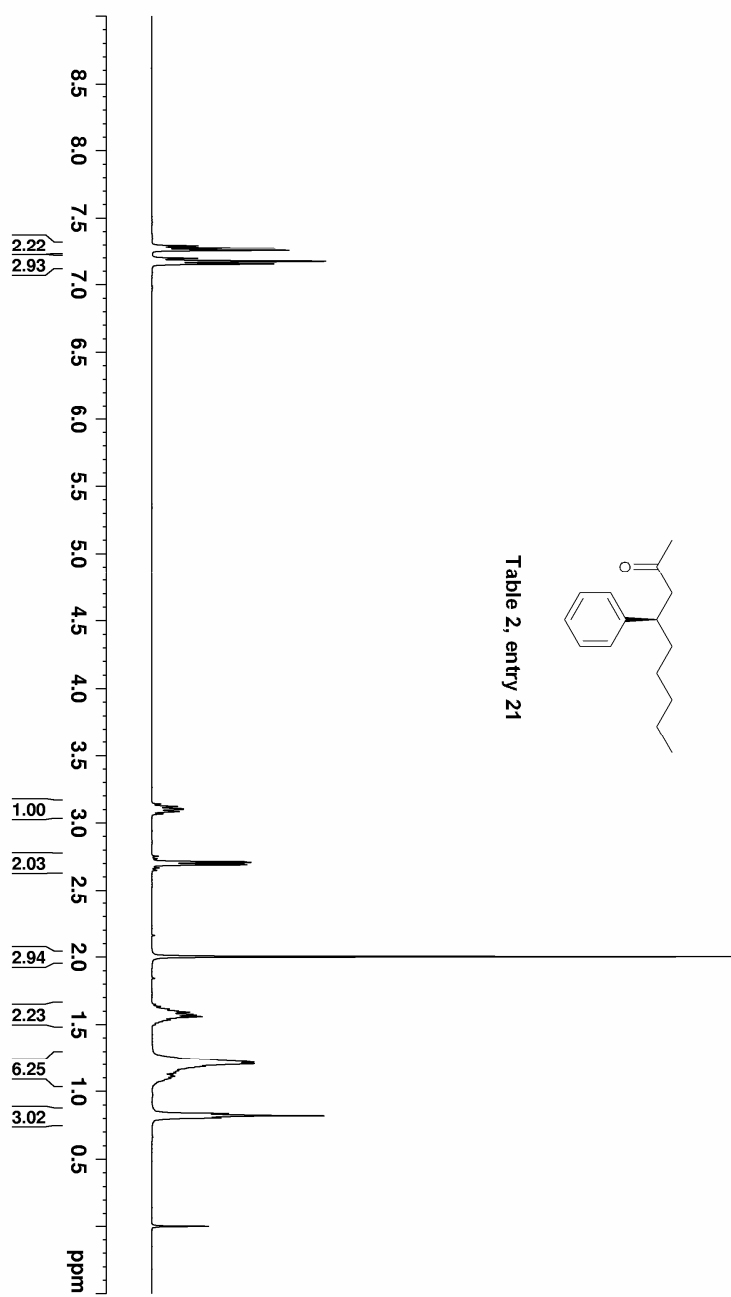

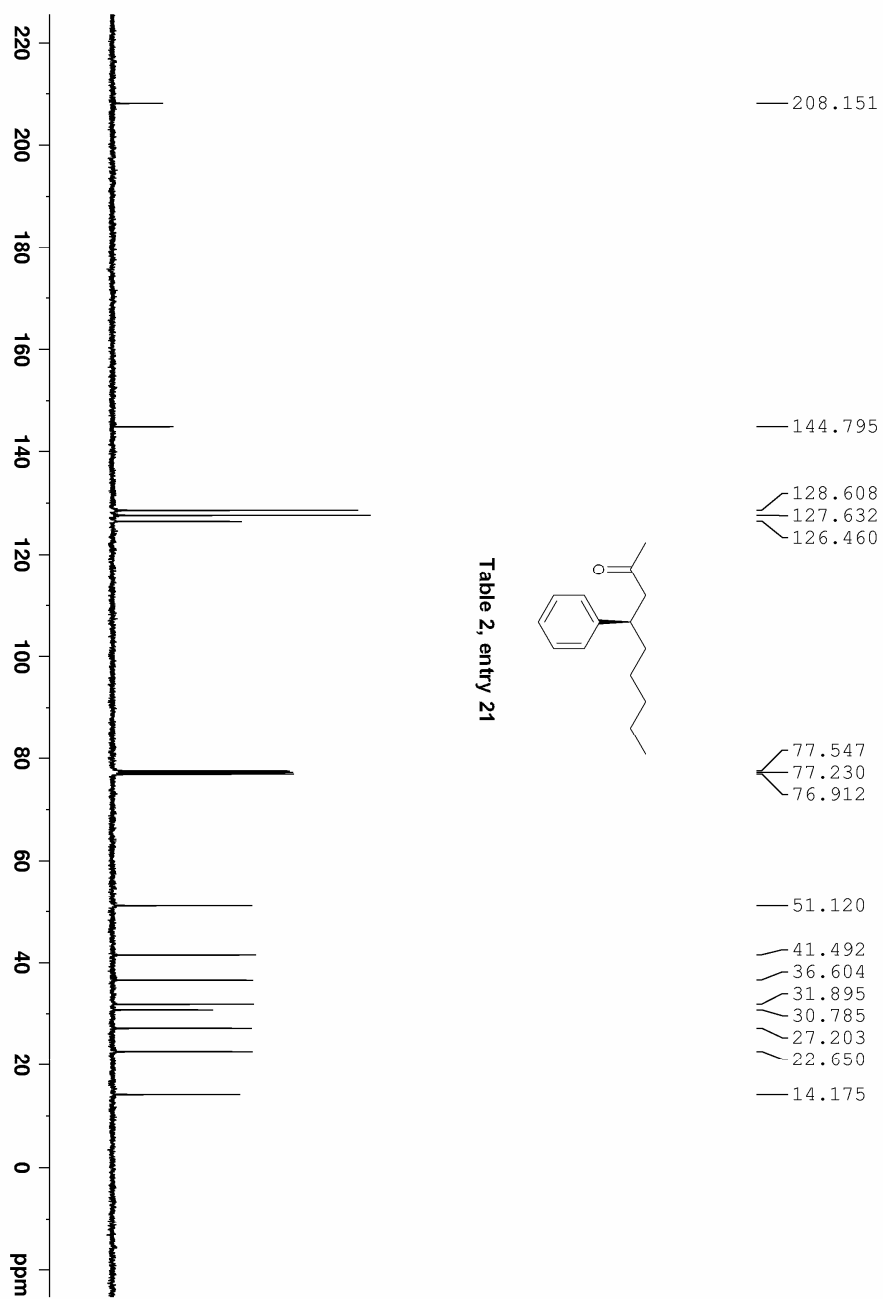

Supplement: c1ob05971h.pdf [file c1ob05971h.pdf]
